# Supplementary material for: Performance of GPT-4 and mainstream Chinese Large Language Models on the Chinese Postgraduate Examination dataset: Potential for AI-assisted Traditional Chinese Medicine
Source: Research Square preprint supplement (doi:10.21203/rs.3.rs-4392855/v1), 2024-05-23
Supplement: Supplementary file 1 [file 1c4e4aaf7d961ea64fd6fad9.xlsx]

## Sheet: Ernie Bot
Number	Type	Subject	Question	The chosen answer from response	Correct answer	LLM's response	Evaluation metrics				Reasons for incorrect response
							Accuracy(TRUE/FALSE)	Logical reasoning(YES/NO)	Ability to use internal information(YES/NO)	Ability to use external information(YES/NO)	Logical error	Information error
1	single-choice question	Basic Theory of TCM	The following is a single-choice question from the Chinese Comprehensive Ability of Clinical Medicine (TCM) Examination. Please choose the correct answer and provide a correct and reasonable answer analysis. The theoretical basis of "seek yang within yin" is ( ) A. Yang gets Yin and is not overly rebellious B. Yin is helped by Yang but not stagnant C. Yang is helped by Yin and biochemical is infi…	A	C	The correct answer is A. Yang is controlled by yin and not by hyperactivity or inversion. The theoretical basis of "seek yang within yin" is that yang is controlled by yin without being excessive or reversed. This sentence refers to in traditional Chinese medicine treatment, in order to achieve the goal of balancing yin and yang, while supplementing yang, it is also necessary to supplement yin. T…	FALSE	YES	YES	NO		YES
2	single-choice question	Basic Theory of TCM	The following is a single-choice question from the Chinese Comprehensive Ability of Clinical Medicine (TCM) Examination. Please choose the correct answer and provide a correct and reasonable answer analysis. According to mutual generation and control among the five elements, the principle of restraining the strong and supporting the weak is demonstrated by ( ) A.Warming the kidney and tonifying t…	A	D	The correct answer is A. Warm the kidney and fortify the spleen. In the law of the Five Elements generating restraint, restraint is the constraint. According to the law of the Five Elements generating restraint, the principle of restraining the strong and supporting the weak is reflected in warming the kidney and strengthening the spleen (A right). The Five phase theory is an important theoretica…	FALSE	YES	YES	YES		YES
3	single-choice question	Basic Theory of TCM	The following is a single-choice question from the Chinese Comprehensive Ability of Clinical Medicine (TCM) Examination. Please choose the correct answer and provide a correct and reasonable answer analysis. What is the expression of a man's "fifty eight" in "The Innocence of Ancient Times" A has strong muscles and bones B. has fallen teeth and withers C. has exhausted the body D. has a burnt face	A	B	The correct answer is: A has strong muscles and bones. In "The Innocence of the Old World", the expression of a man's "fifty eight" is characterized by a strong physique (A is correct), while the expression of a woman's "fifty seven" is followed by "burnt face, drooping hair, and withered teeth" (B is incorrect). "Heavenly Gui exhaustion, lack of essence, kidney failure, and extreme physical cond…	FALSE	YES	YES	YES		YES
4	single-choice question	Basic Theory of TCM	The following is a single-choice question from the Chinese Comprehensive Ability of Clinical Medicine (TCM) Examination. Please choose the correct answer and provide a correct and reasonable answer analysis. According to the Suwen, the Sanjiao is called () A The receiving and holding organ B. The conveyance organ C. The dredging and draining organ D. The reservoir organ	D	C	The correct answer is D. The reservoir organ. The Suwen states: "The Sanjiaos are the officials who will defile, and the water channel will flow out."; Dui, ditch. The official responsible for clearing waterways and maintaining normal discharge of waterways. Therefore, Sanjiao is known as the "The reservoir organ" (D right). "The receiving and holding organ" (A wrong) is the function of the small…	FALSE	YES	YES	YES	YES	YES
5	single-choice question	Basic Theory of TCM	The following is a single-choice question from the Chinese Comprehensive Ability of Clinical Medicine (TCM) Examination. Please choose the correct answer and provide a correct and reasonable answer analysis. The theoretical basis for the saying "Do not sweat in a family with bleeding" is () A Qi can generate fluid B. Fluid can carry gas C. Homogeny of essence and blood D. Homogeny of fluid and bl…	C	D	The correct answer is C. Homogeny of essence and blood. "Sweating is not allowed in patients with frequent bleeding and bleeding.". This is due to the homology of semen and blood, sweating can lead to semen depletion, thereby exacerbating bleeding symptoms. Therefore, choose option C Homogeny of essence and blood as the answer for analysis.	FALSE	YES	YES	NO		YES
6	single-choice question	Basic Theory of TCM	The following is a single-choice question from the Chinese Comprehensive Ability of Clinical Medicine (TCM) Examination. Please choose the correct answer and provide a correct and reasonable answer analysis. The smallest collateral is () A Tertiary collateral vessel B. Bie collateral vessel C. Superficial collateral vessel D. Blood collateral vessel	A	A	The correct answer is A Tertiary collateral vessel. The collateral vessel is a branch of the collateral, divided into the Bie collateral vessel, the superficial collateral vessel, and the tertiary collateral vessel. Among them, the tertiary collateral vessel is the smallest collateral, distributed throughout the body, like the branches of a tree, playing a role in transporting and infiltrating qi…	TRUE	YES	YES	YES
7	single-choice question	Basic Theory of TCM	The following is a single-choice question from the Chinese Comprehensive Ability of Clinical Medicine (TCM) Examination. Please choose the correct answer and provide a correct and reasonable answer analysis. What is the pathogenesis of external heat pathogen, characterized by thirst, liking to drink, shortness of breath, and fatigue A. Summer heat damages the heart and qi B. Summer heat Damage to…	A	D	The correct answer is A. Summer Summer Summer Summer heat damages the heart and qi. Exogenous Summer heat pathogen, also known as summer heat stroke, is an acute disease syndrome that mainly occurs in a hot and humid summer climate. Its main pathogenesis is the injury of yang, body fluids, fluid consumption, and diarrhea. Summer heat is a yang pathogenic factor that easily damages the body and co…	FALSE	YES	YES	YES	YES	YES
8	single-choice question	Basic Theory of TCM	The following is a single-choice question from the Chinese Comprehensive Ability of Clinical Medicine (TCM) Examination. Please choose the correct answer and provide a correct and reasonable answer analysis. "Excess manifesting with extreme deficiency" refers to () A. Excessive evil energy leads to the decline of positive energy, manifested as external "deficiency" B. Weak positive energy leads t…	C	C	The correct answer is C. Qi deficiency and weakness of the organs, which is manifested as external "excess". "Excess manifesting with extreme deficiency" is a pathological state, which refers to the appearance of false phenomena when the qi deficiency of the organs weakens to a certain extent, showing external empirical manifestations, such as strong pulse and red tongue, but in reality, it is an…	TRUE	YES	YES	NO
9	single-choice question	Basic Theory of TCM	The following is a single-choice question from the Chinese Comprehensive Ability of Clinical Medicine (TCM) Examination. Please choose the correct answer and provide a correct and reasonable answer analysis. For those with bleeding from metrorrhagia and a dark purple color mixed with blood clots, the appropriate treatment is () A. Convergence and hemostasis B. Boost qi to contain blood C. Warming…	D	D	The correct answer is D. to dissipate blood stasis and stop bleeding. If there is blood leakage and a dark purple color with blood clots, it indicates that the bleeding is obstructed by stasis. Treatment should be carried out to alleviate stasis and stop bleeding (D right). Convergent hemostasis (A wrong) is suitable for bleeding that is small but persistent. Boost qi to contain blood (B wrong) i…	TRUE	YES	YES	YES
10	single-choice question	Diagnostics of TCM	The following is a single-choice question from the Chinese Comprehensive Ability of Clinical Medicine (TCM) Examination. Please choose the correct answer and provide a correct and reasonable answer analysis. What is not a common indication of bluish and black facial complexion? A. Blood stasis pattern, Pain B. Blood stasis pattern, Infantile convulsions C. Cold pattern, Pain D. Cold pattern, Bloo…	B	B	The correct answer is B. Blood stasis, infantile convulsion. The common main symptoms of cyan and black complexion are blood stasis and pain (ACD), because cyan is the main symptom of pain, cold syndrome and blood stasis, black is the main symptom of pain, deficiency syndrome, cold syndrome or kidney essence exhaustion. Convulsive wind is a common acute and severe illness in childhood, characteri…	TRUE	YES	YES	YES
11	single-choice question	Diagnostics of TCM	The following is a single-choice question from the Chinese Comprehensive Ability of Clinical Medicine (TCM) Examination. Please choose the correct answer and provide a correct and reasonable answer analysis. Which of the following symptoms can be seen as tenesmus A. Dampness-heat in the spleen B. Cold-dampness encumbering the spleen C. Intestinal heat and bowel excess D. Large intestinal dampness…	C	D	The correct answer is C. Intestinal heat and bowel excess. It is one of the common clinical symptoms, which is mostly seen in acute bacterial dysentery, amoebic dysentery and other intestinal infectious diseases, as well as in non infectious diseases such as ulcerative colitis. Dampness-heat in the spleen (BD wrong) is mainly manifested as abdominal distension, dizziness, nausea and vomiting, sti…	FALSE	YES	YES	YES	YES
12	single-choice question	Diagnostics of TCM	The following is a single-choice question from the Chinese Comprehensive Ability of Clinical Medicine (TCM) Examination. Please choose the correct answer and provide a correct and reasonable answer analysis. Which of the following options does not belong to the main disease of dry fur A. Excessive heat and evil B. Deficiency of yin fluid C. Internal accumulation of dampness and evil D. Qi not tra…	C	C	The correct answer is C. The internal accumulation of dampness and evil. The main diseases of dry fur include excessive heat pathogen (A right), deficiency of yin fluid (B right), and inability to transform qi into fluid (D right). This is due to the internal heat pathogen, deficiency of yin fluid, and inability to transform qi into fluid, resulting in a decrease in body fluid in the mouth, dry t…	TRUE	YES	YES	YES
13	single-choice question	Diagnostics of TCM	The following is a single-choice question from the Chinese Comprehensive Ability of Clinical Medicine (TCM) Examination. Please choose the correct answer and provide a correct and reasonable answer analysis. Which of the following options belongs to the same manifestation of heat and heat syndrome A. Aversion to cold with fever, sore throat B. Fever and sweating, thirst and yellow urine C. Fever …	C	B	The correct answer is C. Fever, aversion to heat, shortness of breath, and fatigue. Both pathogenic summer heat pattern and pathogenic fire pattern are characterized by fever, and pathogenic fire pattern can lead to malignant heat. Both pathogenic summer heat pattern and pathogenic fire pattern damage the body and consume qi, resulting in symptoms such as thirst, yellow urine, shortness of breath…	FALSE	YES	YES	YES	YES
14	single-choice question	Diagnostics of TCM	The following is a single-choice question from the Chinese Comprehensive Ability of Clinical Medicine (TCM) Examination. Please choose the correct answer and provide a correct and reasonable answer analysis. Which of the following options does not belong to the clinical manifestations of Water-ffuid retention pattern A. Spit water B. Chest tightness and palpitations D. Excessive vaginal discharge	D	D	The correct answer is D. Take a larger amount. The clinical manifestations of water-ffuid retention pattern include abdominal distension, vomiting of clear water (pair A), dizziness and dizziness (pair B), chest tightness and palpitations (pair C), and slippery fur. However, excessive vaginal discharge (D is incorrect, which is the correct answer to this question) is a manifestation of vaginal di…	TRUE	YES	YES	YES
15	single-choice question	Diagnostics of TCM	The following is a single-choice question from the Chinese Comprehensive Ability of Clinical Medicine (TCM) Examination. Please choose the correct answer and provide a correct and reasonable answer analysis. Which of the following options does not belong to the clinical manifestations of blood heat pattern A. Spotted purple black color B. Repeated bleeding with blood clots C. Fresh red and sticky…	D	B	The correct answer is D. Excessive amount of early menstrual period. Blood heat pattern refers to the burning heat that invades the blood vessels, resulting in bleeding symptoms such as vomiting blood, bleeding, excessive menstruation in women, and collapse and leakage, accompanied by symptoms of body heat, thirst, irritability, red and purple tongue, and yellow fur. Spotted purple black (pair A)…	FALSE	YES	YES	YES		YES
16	single-choice question	Diagnostics of TCM	The following is a single-choice question from the Chinese Comprehensive Ability of Clinical Medicine (TCM) Examination. Please choose the correct answer and provide a correct and reasonable answer analysis. Symptoms include palpitations and restlessness, insomnia and frequent dreaming, hot flashes and night sweats, redness in the cheekbones, redness in the tongue and lack of fluids, and thin pul…	A	A	The correct answer is A. Heart Yin deficiency. Symptoms include palpitations, restlessness, insomnia, excessive dreaming, hot flashes and night sweats, redness in the cheekbones, redness in the tongue, and weak pulse count. Based on the symptoms, this syndrome belongs to Heart Yin Deficiency (A right). Heart fire hyperactivity (B wrong) is characterized by restlessness, insomnia, sore tongue, vom…	TRUE	YES	YES	YES
17	single-choice question	Diagnostics of TCM	The following is a single-choice question from the Chinese Comprehensive Ability of Clinical Medicine (TCM) Examination. Please choose the correct answer and provide a correct and reasonable answer analysis. According to the "Shang Han Lun" Treatise on Cold Damage, those who suffer from both Taiyang pattern and Shaoyang pattern simultaneously belong to () A. Combined disorder B. Concurrent collat…	B	B	The correct answer is B. Concurrent collateral pattern. According to the "Shang Han Lun", the simultaneous occurrence of Taiyang pattern and Shaoyang pattern belongs to the category of Taishao combined disease, also known as concurrent collateral pattern (B right). "Combined disorder" refers to the appearance of a syndrome in another collateral at the same time as a disease in one collateral, rat…	TRUE	YES	YES	YES
18	single-choice question	Diagnostics of TCM	The following is a single-choice question from the Chinese Comprehensive Ability of Clinical Medicine (TCM) Examination. Please choose the correct answer and provide a correct and reasonable answer analysis. Which of the following options is visible in the Damp heat in the liver and gallbladder pattern but not in the Damp heat accumulating in the spleen pattern A. Yellow body and eyes B. Yellow a…	A	D	The correct answer is A. Yellow body and eyes. Both the Damp heat in the liver and gallbladder pattern and the Damp heat accumulating in the spleen pattern can show a combination of heavy dampness and mild heat, or a combination of dampness and heat, resulting in symptoms such as limb fatigue, head and body fatigue, chest and epigastric fullness, dizziness, nausea and vomiting, abdominal distensi…	FALSE	YES	YES	YES		YES
19	single-choice question	Pharmacology of TCM	The following is a single-choice question from the Chinese Comprehensive Ability of Clinical Medicine (TCM) Examination. Please choose the correct answer and provide a correct and reasonable answer analysis. According to the theory of medicinal properties, most of the drugs used to treat edema and inhibited urination have the flavor of ( ) A. Astringent flavor B. Bland flavor C. Salty flavor D. B…	B	B	The correct answer is B. Bland flavour. In the theory of medicinal properties, the five flavours refer to the five different medicinal flavours of a drug: sour, bitter, sweet, spicy, and salty, which reflect the yin and yang properties of the drug's action. Among them, bland flavour is often used together with sweet flavour, which has the effect of permeability and diuresis, and can be used to tr…	TRUE	YES	YES	YES
20	single-choice question	Pharmacology of TCM	The following is a single-choice question from the Chinese Comprehensive Ability of Clinical Medicine (TCM) Examination. Please choose the correct answer and provide a correct and reasonable answer analysis. Which of the following options is the most suitable medication for treating solid heat stagnation and dry stool A. Cassiae Semen B. Sennae Folium C. Polygoni Cuspidati Rhizoma Et Radix D. Nat…	D	D	The correct answer is D. Natrii Sulfas. Natrii Sulfas is a strong laxative that can stimulate intestinal peristalsis and facilitate the smooth discharge of feces, especially suitable for patients with solid heat accumulation and dry stools. Although Cassiae Semen, Sennae Folium, and Polygoni Cuspidati Rhizoma Et Radix also have a laxative effect, their effect is not as strong as that of Natrii Su…	TRUE	YES	YES	YES
21	single-choice question	Pharmacology of TCM	The following is a single-choice question from the Chinese Comprehensive Ability of Clinical Medicine (TCM) Examination. Please choose the correct answer and provide a correct and reasonable answer analysis. What are the common effects of Aconiti Lateralis Radix Praeparata and Cinnamomi Cortex A. Restore yang to save from collapse,warm the middle to check vomiting B. Inducing fire to return to th…	C	C	The correct answer is C. Tonify fire and assist yang, dissipate cold and alleviate pain. Aconiti Lateralis Radix Praeparata and Cinnamomi Cortex are both medicines that warm yang and dispel cold, with the effects of Tonify fire and assist yang, dissipate cold and alleviate pain. The difference between them lies in the fact that Aconite has the effects of restoring yang and relieving stress, warmi…	TRUE	YES	YES	YES
22	single-choice question	Pharmacology of TCM	The following is a single-choice question from the Chinese Comprehensive Ability of Clinical Medicine (TCM) Examination. Please choose the correct answer and provide a correct and reasonable answer analysis. Which of the following Parasite-expelling medicines has a bitter, spicy, and warm nature, and belongs to the stomach and large intestine A. Nan Gua Zi B. He Cao Ya C. Arecae Semen D. Torreyae…	C	C	The correct answer is C. Arecae Semen. Arecae Semen has a bitter, spicy, and warm flavour, which belongs to the stomach and large intestine. It is a commonly used deworming medicine with the effects of killing insects, reducing accumulation, promoting qi, promoting diuresis, and intercepting malaria. It can be used to treat symptoms such as insect accumulation, abdominal pain, diarrhea, abdominal…	TRUE	YES	YES	YES
23	single-choice question	Pharmacology of TCM	The following is a single-choice question from the Chinese Comprehensive Ability of Clinical Medicine (TCM) Examination. Please choose the correct answer and provide a correct and reasonable answer analysis. What is the daily dosage of Cinnabarisis commonly taken as a powder A. 0.015-0.03g B.0.1-0.5g C.1-2g D.3-5g	B	B	The correct answer is B.0.1-0.5g. The main component of Cinnabaris is mercury sulfide (HgS), which has high purity, strong covering power, and strong ability to absorb ultraviolet rays. Mercury is a toxic medicinal herb in traditional Chinese medicine, and the main component of Cinnabaris, mercury sulfide, is easily decomposed into mercury ions during the boiling process. Therefore, Cinnabaris sh…	TRUE	YES	YES	YES
24	single-choice question	Pharmacology of TCM	The following is a single-choice question from the Chinese Comprehensive Ability of Clinical Medicine (TCM) Examination. Please choose the correct answer and provide a correct and reasonable answer analysis. What is the best medicine for astringe the intestine and stop diarrhoea that should be simmered, for regulating the lungs, clearing heat, promoting swallowing and opening sounds, and for prom…	A	A	The correct answer is A. Chenulae Fructus. The best medicine for astringe the intestine and stop diarrhoea is to simmer it, regulate the lungs and clear heat, promote swallowing and sound opening, and it is suitable for daily use. Simmering Chenulae Fructus can enhance itsastringe the intestine and stop diarrhoea effects, and is commonly used for chronic diarrhea and dysentery; ShengChenulae Fruc…	TRUE	YES	YES	NO
25	single-choice question	Pharmacology of TCM	The following is a single-choice question from the Chinese Comprehensive Ability of Clinical Medicine (TCM) Examination. Please choose the correct answer and provide a correct and reasonable answer analysis. What is the effect of Cimicifugae Rhizomae A. Promote skin eruption B. Ascending yang to stop diarrhea C. Soothe the liver and regulate qi D. Promote fluid production to quench thirst	B	A	The correct answer is B. Promoting yang and stopping diarrhea. The efficacy of Cimicifugae Rhizomae is to elevate yang, relieve rash, detoxify, and stop diarrhea. Its yang enhancing effect is mainly manifested in enhancing the yang qi of the Yangming collateral, so it can be used to treat diseases such as spleen deficiency and qi depression or organ prolapse. In addition, Cimicifugae Rhizoma can …	FALSE	YES	YES	YES	YES	YES
26	single-choice question	Pharmacology of TCM	The following is a single-choice question from the Chinese Comprehensive Ability of Clinical Medicine (TCM) Examination. Please choose the correct answer and provide a correct and reasonable answer analysis. What is the medication that has the effects of warming the lungs, clearing phlegm, promoting qi, dispersing nodules, unblocking collaterals, and relieving pain A.Cynanchi Stauntonii Rhizoma E…	C	C	The correct answer is C. White Mustard Seed. White mustard seeds have the effects of warming the lungs, clearing phlegm, promoting qi circulation, dispersing nodules, unblocking collaterals, and relieving pain. Its main effects include warming the lungs and removing phlegm, promoting qi and dispersing nodules, and dispersing cold and relieving pain. Among them, warming the lungs and expelling phl…	TRUE	YES	YES	YES
27	single-choice question	Pharmacology of TCM	The following is a single-choice question from the Chinese Comprehensive Ability of Clinical Medicine (TCM) Examination. Please choose the correct answer and provide a correct and reasonable answer analysis. Medications that can not only soothe the liver, promote qi circulation, relieve depression, but also stimulate the stomach, digest food, and strengthen the spleen A. Rose B. Bergamot C. Malt …	B	C	The correct answer is B. Buddha's hand. The title mentions that drugs need to have the effects of soothing the liver, promoting qi circulation, relieving depression, appetizing digestion, and strengthening the spleen. However, bergamot has a spicy, bitter, sour, and warm taste, and has the effects of soothing the liver, relieving depression, eliminating dampness and phlegm, regulating qi and stom…	FALSE	YES	YES	YES	YES	YES
28	single-choice question	Formulas of TCM	The following is a single-choice question from the Chinese Comprehensive Ability of Clinical Medicine (TCM) Examination. Please choose the correct answer and provide a correct and reasonable answer analysis. What are the drugs in both Qianghuo Shengshi Decoction and Daqin Jiao Decoction A. Atractylodis Rhizoma and Angelicae Pubescentis Radix B. Chuanxiong Rhizoma and Saposhnikoviae Radix C.Ligust…	B	B	The correct answer is B. Chuanxiong Rhizoma and Saposhnikoviae Radix ﻿ The drugs contained in both Qianghuo Shengshi Decoction and Daqin Jiao Decoction are Chuanxiong Rhizoma and Saposhnikoviae Radix (B right). The medicinal components of Qianghuo Shengshi Decoction include Notopterygii Rhizoma Et Radix、Angelicae Pubescentis Radix、Ligustici Rhizoma Et Radix、Saposhnikoviae Radix、Glycyrrhizae Radix…	TRUE	YES	YES	NO
29	single-choice question	Formulas of TCM	The following is a single-choice question from the Chinese Comprehensive Ability of Clinical Medicine (TCM) Examination. Please choose the correct answer and provide a correct and reasonable answer analysis. What is the medication that is contained in the Bixie Fenqing drink in "Yang Shi Jia Cang Fang", but not in the Bixie Fenqing drink in "Yi Xue Xin Xu" A. Linderae Radix, Yizhiren B. Atractylo…	A	A	The correct answer is A. Linderae Radix, Yizhiren ﻿ The drugs included in the Bixie Fenqing drink in "Yang Shi Jia Cang Fang" and not included in the Bixie Fenqing drink in "Yi Xue Xin Xu" are Linderae Radix, Yizhiren (A right). The drugs that are present in both formulas are Phellodendri Chinensis Cortex, Yizhiren, Poria cocos, Acorus calamus, and Atractylodes macrocephala.	TRUE	YES	YES	YES
30	single-choice question	Formulas of TCM	The following is a single-choice question from the Chinese Comprehensive Ability of Clinical Medicine (TCM) Examination. Please choose the correct answer and provide a correct and reasonable answer analysis. What is the efficacy of Wu Zhu Yu Decoction A. Warm in the middle to dispel cold, slow and urgent to relieve pain B. Warm in the middle to supplement deficiency, lower adverse reactions and s…	B	B	The correct answer is B. Warm the middle and tonify the deficiency, lower the inversion and stop vomiting. ﻿ The efficacy of Wu Zhu Yu Decoction is to warm the middle and tonify deficiency, lower adverse reactions and stop vomiting (B right). Its function is to treat stomach pain or vomiting caused by liver and stomach deficiency cold and turbidity yin inversion. Euodiae Fructus in the formula ha…	TRUE	YES	YES	YES
31	single-choice question	Formulas of TCM	The following is a single-choice question from the Chinese Comprehensive Ability of Clinical Medicine (TCM) Examination. Please choose the correct answer and provide a correct and reasonable answer analysis What are the benefits of both Zi Jin Ding and Xian Fang Huo Ming Yin A. Clearing heat and detoxifying B. Reducing swelling and pain C. Removing decay and promoting muscle growth D. Softening a…	B	B	The correct answer is B. Reduce swelling and relieve pain. Both Zi Jin Ding and Xian Fang Huo Ming Yin have the effect of reducing swelling and relieving pain (B right). Among them, Zi Jin Ding has the effects of opening and closing the orifices, clearing dirt and turbidity, detoxifying and relieving pain. It can be used to treat diseases such as heatstroke, abdominal distension, vomiting and dia…	TRUE	YES	YES	NO
32	single-choice question	Formulas of TCM	The following is a single-choice question from the Chinese Comprehensive Ability of Clinical Medicine (TCM) Examination. Please choose the correct answer and provide a correct and reasonable answer analysis What is the prescription theory that emphasizes the dual nourishment of Qi and blood, with a focus on supplementing Qi and promoting the self generation of Qi and blood to nourish blood and ca…	A	A	The correct answer is A. Gui Pi Decoction. ﻿ Gui Pi Decoction (A right) is mainly used to tonify qi, combined with blood tonifying drugs to promote qi and blood production, achieving the goal of tonifying qi and generating blood. Astragali Radixin the formula is sweet and warm, tonifying the spleen, tonifying qi, and promoting yang. It is the main medicine; Ginseng Radix Et Rhizoma is sweet and w…	TRUE	YES	YES	YES
33	single-choice question	Formulas of TCM	The following is a single-choice question from the Chinese Comprehensive Ability of Clinical Medicine (TCM) Examination. Please choose the correct answer and provide a correct and reasonable answer analysis. What is the formula for clearing up heat and purging heat A. Da Cheng Qi Decoction B.Huang Lian Jie Du Decoction C. Liang Ge San D.Ge Gen Qin Lian Decoction	C	C	The correct answer is C. Liang Ge San . ﻿ Liang Ge San (C right) has both laxative and clear upper medicine in parallel, but laxative is to clear and relieve stagnation heat, that is, "formulas that purge the interior heat", rather than mainly using laxative. Da Cheng Qi Decoction (A wrong) has a strong laxative effect, which is designed to relieve excessive heat in the lower part of the body. Th…	TRUE	YES	YES	YES
34	single-choice question	Formulas of TCM	The following is a single-choice question from the Chinese Comprehensive Ability of Clinical Medicine (TCM) Examination. Please choose the correct answer and provide a correct and reasonable answer analysis Indicating frequent urination, it can also be used to treat enuresis. The formula for enuresis is () A. Jin Suo Gu Jing Wan B. Sang Piao Xiao San C. Shen Qi Wan D. You Gui Wan	B	B	The correct answer is B. Sang Piao Xiao San. ﻿ Sang Piao Xiao San (B right) has the effects of regulating and tonifying the heart and kidneys, astringent essence, and stopping nocturnal emissions, mainly treating frequent urination, enuresis, and nocturnal emissions. Jin Suo Gu Jing Wan (A Co) has the effect of strengthening the kidney and astringent essence, and is mainly used to treat kidney de…	TRUE	YES	YES	YES
35	single-choice question	Formulas of TCM	The following is a single-choice question from the Chinese Comprehensive Ability of Clinical Medicine (TCM) Examination. Please choose the correct answer and provide a correct and reasonable answer analysis What is the formula for treating women who suffer from various symptomatic diseases and have persistent leakage? It can also be used to treat amenorrhea or postpartum lochia and abdominal pain…	D	D	The correct answer is D. Gui Zhi Fu Ling Wan. Gui Zhi Fu Ling Wan (D right) has the effects of promoting blood circulation, removing blood stasis, and relieving symptoms. It is mainly used to treat women with various symptomatic diseases and persistent leakage. It can also be used to treat amenorrhea or postpartum lochia and abdominal pain. Sheng Hua Decoction (A wrong) has the effects of nourish…	TRUE	YES	YES	YES
36	single-choice question	Formulas of TCM	The following is a single-choice question from the Chinese Comprehensive Ability of Clinical Medicine (TCM) Examination. Please choose the correct answer and provide a correct and reasonable answer analysis The application of Si Ni Decoction is recommended for patients with symptoms such as limb syncope, chills, and curling up. The pulse may be weak and the pulse may recur from below, but the rem…	A	B	The correct answer is A. Scallion white. ﻿ The application of Si Ni Decoction should be used to treat patients with limb syncope, cold aversion, and slight and self descending meridians. Although the benefits have stopped, the remaining symptoms are still present. Scallion White (A right) should be added to enhance the efficacy of clearing yang, dispersing cold, and restoring yang to save symptom…	FALSE	YES	YES	YES		YES
37	single-choice question	Internal Medicine of TCM	The following is a single-choice question from the Chinese Comprehensive Ability of Clinical Medicine (TCM) Examination. Please choose the correct answer and provide a correct and reasonable answer analysis Female, 49 years old. Insomnia for 4 months, restlessness and difficulty falling asleep, palpitations and frequent dreams accompanied by dizziness and tinnitus, soreness and weakness in the wa…	B	C	The correct answer is: B. Zhi Bai Di Huang Wan. ﻿ The patient is a middle-aged female who suffers from insomnia, restlessness, difficulty falling asleep, palpitations and dreams accompanied by dizziness and tinnitus, soreness and weakness in the waist and knees, hot flashes and night sweats,feverish sensations in palms, soles and chest, dryness and lack of saliva in the throat, red coating on the…	FALSE	YES	YES	YES	YES	YES
38	single-choice question	Internal Medicine of TCM	The following is a single-choice question from the Chinese Comprehensive Ability of Clinical Medicine (TCM) Examination. Please choose the correct answer and provide a correct and reasonable answer analysis Female, 34 years old, coughing for 3 months, chest X-ray shows increased texture in both lower lungs. Coughing and thrusting, chest and flank swelling and pain, dry throat and bitter mouth, le…	C	C	The correct answer is C. Liver ffre affecting the lung pattern. The patient is a 34 year old female who coughed for 3 months. Chest X-ray shows an increase in texture in both lower lungs (prolonged cough, prolonged condition, lack of clarity and clarity in the lungs, loss of lung fluid, insufficient lung yin, endogenous deficiency heat, heat evaporation in the lungs, phlegm and heat accumulation,…	TRUE	YES	YES	YES
39	single-choice question	Internal Medicine of TCM	The following is a single-choice question from the Chinese Comprehensive Ability of Clinical Medicine (TCM) Examination. Please choose the correct answer and provide a correct and reasonable answer analysis. Female, 28 years old, experienced external symptoms a week ago, with aversion to cold and fever, and head and body pain. Symptoms include: cough, yellow phlegm, wheezing in the throat, shortn…	B	B	The correct answer is: B. Ding Chuan Decoction. After experiencing external symptoms, the patient may experience coughing and yellow phlegm, wheezing in the throat, shortness of breath, dry and thirsty mouth, red and greasy tongue coating, and smooth pulse. Based on the patient's symptoms and tongue pulse, it can be diagnosed as phlegm heat obstructing lung type asthma. At this time, Ding Chuan T…	TRUE	YES	YES	YES
40	single-choice question	Internal Medicine of TCM	Male, 55 years old. I usually have a headache, dizziness, and sudden left hemiplegia. My tongue is strong and silent, and my consciousness is not clear. I have a lot of phlegm and constipation, and my tongue is dark red. The coating is yellow and greasy, and my pulse is smooth. The diagnosis is () A. Wind Yang Upward Disturbance Syndrome of Stroke B. Phlegm Heat and Fu Syndrome of Stroke C. Phleg…	B	B	The correct answer is: B. Stroke with phlegm heat and viscera syndrome. The patient is an elderly male (a high-risk group for stroke) who usually has a headache and dizziness. Suddenly, the left hemiplegia occurs, with a strong tongue and unclear consciousness, frequent phlegm and constipation. The tongue is dark red, the coating is yellow and greasy, and the pulse is smooth. The diagnosis is of …	TRUE	YES	YES	YES
41	single-choice question	Internal Medicine of TCM	The following is a single-choice question from the Chinese Comprehensive Ability of Clinical Medicine (TCM) Examination. Please choose the correct answer and provide a correct and reasonable answer analysis Female, 75 years old. Long term illness, incurable for a long time, with symptoms such as dizziness and tinnitus, dry eyes and photophobia, numbness in limbs, impatience and irritability, red …	D	C	The correct answer is: D. Zuo Guiyin. The patient is an elderly female who has been ill for a long time and presents with symptoms such as dizziness, tinnitus, dry eyes, photophobia, numbness in limbs, impatience and irritability, less red tongue coating, and thin pulse. It belongs to the syndrome of kidney yin deficiency, water not containing wood, and liver yang disturbance. The treatment shoul…	FALSE	YES	YES	YES		YES
42	single-choice question	Internal Medicine of TCM	The following is a single-choice question from the Chinese Comprehensive Ability of Clinical Medicine (TCM) Examination. Please choose the correct answer and provide a correct and reasonable answer analysis Male, 67 years old. A history of chronic bronchitis for 19 years. Symptoms include shallow breathing, opening mouth and lifting shoulders, inability to lie flat, chest tightness and palpitatio…	B	B	The correct answer is: B. Lung distension, deficiency of lung and kidney qi syndrome. The patient is an elderly male with a 19 year history of chronic bronchitis, indicating a long-term history of chronic lung disease and gradual decline in lung function. Symptoms include shallow breathing, opening mouth and lifting shoulders, inability to lie flat, chest tightness and palpitations, cold and swea…	TRUE	YES	YES	YES
43	single-choice question	Internal Medicine of TCM	The following is a single-choice question from the Chinese Comprehensive Ability of Clinical Medicine (TCM) Examination. Please choose the correct answer and provide a correct and reasonable answer analysis Male, 74 years old. A history of benign prostatic hyperplasia for 10 years. For the past month, I have had difficulty urinating, dribbling down, feeling tired and fatigued, feeling chilly and …	D	D	The correct answer is: D. Warm and tonify kidney yang, transform qi and promote diuresis. An elderly male patient with a history of prostate hyperplasia for 10 years, recent difficulty urinating, dribbling (typical manifestation of prostate hyperplasia), fatigue and fatigue, fear of cold limbs, cold pain in the lower back and knees, light and fat tongue, thin and white coating, and deep and thin …	TRUE	YES	YES	NO
44	single-choice question	Internal Medicine of TCM	The following is a single-choice question from the Chinese Comprehensive Ability of Clinical Medicine (TCM) Examination. Please choose the correct answer and provide a correct and reasonable answer analysis Female, 63 years old. Yesterday, I suddenly had a cold and fever, headache, strong and urgent neck and back, severe limb soreness, convulsions, thin and white coating, and tight pulse. Its dia…	D	D	The correct answer is: D. Spasm syndrome, evil obstructing meridian syndrome. Elderly female patients with aversion to cold, fever, headache, strong and urgent neck and back, limb soreness, limb convulsions (indicating symptoms of limb fascial spasm), thin and white coating, and loose pulse (belonging to wind cold and evil qi obstruction of meridians). Based on the patient's medical history, symp…	TRUE	YES	YES	YES
45	single-choice question	Internal Medicine of TCM	The following is a single-choice question from the Chinese Comprehensive Ability of Clinical Medicine (TCM) Examination. Please choose the correct answer and provide a correct and reasonable answer analysis The main principles for treating Phlegm-ffuid retention are () A. Attack and chase B. Infiltrate and benefit C. Warm and transform D. Spread and disperse	C	C	The correct answer is: C. Warm and transform. ﻿ The main principle of treating phlegm-ffuid retention is to warm up (C right), that is, by warming yang and transforming qi, promoting the flow of qi and gradually drinking, in order to eliminate water retention. Attacking and expelling (A wrong), infiltrating and benefiting (B wrong), and dispersing (D wrong) are not the main principles for treatin…	TRUE	YES	YES	NO
46	single-choice question	Internal Medicine of TCM	The following is a single-choice question from the Chinese Comprehensive Ability of Clinical Medicine (TCM) Examination. Please choose the correct answer and provide a correct and reasonable answer analysis Male, 32 years old, enjoys spicy food. Yesterday, after a gathering, he vomited blood and red, mixed with food residue. He had bloating and stuffiness in the epigastric cavity, bad breath and …	A	B	The correct answer is: A. Xie Xin Decoction and Qing Wei San. The patient vomited blood with a red color, mixed with food residue, bloating and stuffiness in the epigastric cavity, bad breath and constipation, black stools, red tongue and yellow fur, and slippery pulse count. The syndrome belongs to the invasion of pathogenic heat, which leads to heat accumulation in the stomach, heat and blood p…	FALSE	YES	YES	YES		YES
47	single-choice question	Internal Medicine of TCM	The following is a single-choice question from the Chinese Comprehensive Ability of Clinical Medicine (TCM) Examination. Please choose the correct answer and provide a correct and reasonable answer analysis Female, 86 years old, with 26 years history of hypertension and 21 years history of diabetes, taking losartan potassium, acarbose and aspirin for a long time. Symptoms include chest tightness …	D	D	The correct answer is: D. Warm and replenish yang qi, and invigorate the heart yang. The patient is an elderly female with 26 years of hypertension history and 21 years of diabetes history. She has taken losartan potassium, acarbose, and aspirin for a long time. She has chest tightness and shortness of breath, palpitations and pain, and even more movement (insufficient heart qi and blood vessels)…	TRUE	YES	YES	YES
48	single-choice question	Internal Medicine of TCM	The following is a single-choice question from the Chinese Comprehensive Ability of Clinical Medicine (TCM) Examination. Please choose the correct answer and provide a correct and reasonable answer analysis Female, 28 years old. After 4 months of delivery, there is heaviness in the limbs, muscle and joint soreness, poor mobility, inability to descend to the ground, worsening after activity, pale …	D	D	The correct answer is: D. Yi Yi Ren Decoction. A female patient, 4 months after giving birth (postpartum), presents with heavy limbs, muscle and joint pain, poor mobility, inability to go down to the ground (joint weakness), worsening after activity, pale and greasy tongue coating, and pulse moistening (dampness trapped spleen, muscle and joint pain). Based on the patient's medical history, sympt…	TRUE	YES	YES	YES
49	single-choice question	Internal Medicine of TCM	The following is a single-choice question from the Chinese Comprehensive Ability of Clinical Medicine (TCM) Examination. Please choose the correct answer and provide a correct and reasonable answer analysis Female, 30 years old. For the past three months, there have been loose and lax stools, which persist and recur. After eating, there is stuffiness and discomfort. If there is a slight intake of…	C	C	The correct answer is: C. Strengthening the spleen and tonifying qi, dispelling dampness and stopping diarrhea. The patient has loose and intermittent diarrhea during bowel movements, which can persist and recur. If there is a slight intake of greasy food, the frequency of bowel movements will increase. The patient will feel stuffy and uncomfortable, with a pale complexion, fatigue and weakness. …	TRUE	YES	YES	NO
50	single-choice question	Internal Medicine of TCM	The following is a single-choice question from the Chinese Comprehensive Ability of Clinical Medicine (TCM) Examination. Please choose the correct answer and provide a correct and reasonable answer analysis Female, 32 years old, usually experiences loss of appetite and discomfort in the stomach after eating. I have been experiencing nausea and vomiting for the past week, feeling tired and fatigue…	B	B	The correct answer is: B. Xiang Sha Liu Jun Zi Decoction with modifications. The patient usually experiences loss of appetite, discomfort in the stomach after eating, nausea and vomiting for the past week, fatigue and fatigue, stuffiness in the epigastric region, difficulty in bowel movements, white and smooth tongue coating, and weak pulse. Based on symptoms and tongue pulse, it is diagnosed as …	TRUE	YES	YES	YES
51	single-choice question	Internal Medicine of TCM	The following is a single-choice question from the Chinese Comprehensive Ability of Clinical Medicine (TCM) Examination. Please choose the correct answer and provide a correct and reasonable answer analysis.Female, 43 years old, edema for many years, sometimes mild and sometimes severe, aggravated before menstruation, edema continued for 3 months, swollen face, stinging in the waist, purple and d…	B	C	The correct answer is: B. Shipi San and Fangji HUangqi Decoction. The patient's edema for many years, sometimes mild and sometimes severe, aggravated before menstruation, edema continued for 3 months, the face was swollen, the waist was tingling, the tongue was purple and white, and the pulse was thin, and the diagnosis was menstrual edema.	FALSE	YES	YES	NO		YES
52	single-choice question	Acupuncture and Moxibustion	The following is a single-choice question from the Chinese Comprehensive Ability of Clinical Medicine (TCM) Examination. Please choose the correct answer and provide a correct and reasonable answer analysis. Located 7 inches below the cubital crease is ( ) A.LU6 B.LI6 C.PC4 D.SJ6	B	C	The correct answer is B. LI6. 7 inches below the the cubital crease is the LI6.	FALSE	NO	NO	NO		YES
53	single-choice question	Acupuncture and Moxibustion	The following is a single-choice question from the Chinese Comprehensive Ability of Clinical Medicine (TCM) Examination. Please choose the correct answer and provide a correct and reasonable answer analysis. The main treatment of the branch ditch and the non-main treatment of the external guan are () A.Tinnitus B.Eyes are swollen and painful C.diarrhea D.constipation	D	D	The correct answer is D. constipation. The Zhigou acupoint mainly treats constipation, while the SJ5 acupoint has no effect on the treatment of constipation, so the main symptom of the Zhigou and not the SJ5 is constipation (D right). In addition, the Zhigou acupoint can also treat flank pain, vomiting, diarrhea, headache, deafness, tinnitus, eye redness and pain, mouth silence and other diseases…	TRUE	YES	YES	YES
54	single-choice question	Acupuncture and Moxibustion	The following is a single-choice question from the Chinese Comprehensive Ability of Clinical Medicine (TCM) Examination. Please choose the correct answer and provide a correct and reasonable answer analysis. Among the following acupoints, acupuncture is not suitable for moxibustion () A. Eyesight B. Qi Sea C. Dazhu D. Baihui	A	A	The correct answer is A.qing ming. The acupuncture point that should be acupuncture and moxibustion is the qing ming acupoint (A right), because the qing ming acupoint is the optic nerve, and the ophthalmic nerve is very delicate, once the acupuncture touches the optic nerve, the patient will immediately have unbearable soreness, swelling, heaviness, numbness and other sensations, and the vision …	TRUE	YES	YES	YES
55	single-choice question	Acupuncture and Moxibustion	The following is a single-choice question from the Chinese Comprehensive Ability of Clinical Medicine (TCM) Examination. Please choose the correct answer and provide a correct and reasonable answer analysis. Among the following Shu Xue, all of them can be used to treat urticaria and eczema: A. ST35, KI3 B. GB34,LU5 C. LU5,SP10 D. LU4 ,SP10	C	C	The correct answer is C. LU5,SP10。 The LU5 acupoint is located at the lateral end of the elbow striation, flexing the elbow, when the ruler Ze and the lateral epicondyle of the humerus connect to the midpoint, it is the meridian acupoint of the hand, which has the effect of dispelling wind and relieving the surface, clearing heat and dampness, harmonizing qi and blood, and activating the meridian…	TRUE	YES	YES	YES
56	single-choice question	Internal Medicine of TCM	The following is a single-choice question from the Chinese Comprehensive Ability of Clinical Medicine (TCM) Examination. Please choose the correct answer and provide a correct and reasonable answer analysis. Male, 73 years old, with a history of hypertension for 10 years and coronary heart disease for 8 years. 3 weeks ago, I had palpitations due to fright, I didn't sleep a lot, I ate a lot, I did…	B	C	The correct answer is: B.Baizi Yangxin Wan. The patient is an elderly male with a history of long-term hypertension and coronary heart disease, palpitations after being frightened, sleepless dreams, lack of food and sluggishness, pale tongue, and thin pulse. Based on the patient's medical history, symptoms, and pulse, the diagnosis is palpitations (arrhythmia-ventricular premature contractions), …	FALSE	YES	YES	YES	YES
57	single-choice question	Internal Medicine of TCM	The following is a single-choice question from the Chinese Comprehensive Ability of Clinical Medicine (TCM) Examination. Please choose the correct answer and provide a correct and reasonable answer analysis. Male, 73 years old, with a history of hypertension for 10 years and coronary heart disease for 8 years. 3 weeks ago, I had palpitations due to fright, I didn't sleep a lot, I ate a lot, I did…	C	D	The correct answer is: C. Chest paralysis cold condensation heart pulse pattern. The patient is an elderly male with a history of long-term hypertension and coronary heart disease, restless palpitations after being frightened (history of palpitations), sleepless dreams, lack of food, pale tongue, and thin pulse (heart and gallbladder qi deficiency syndrome); Because of chest tightness and chest p…	FALSE	YES	YES	YES		YES
58	single-choice question	Internal Medicine of TCM	The following is a single-choice question from the Chinese Comprehensive Ability of Clinical Medicine (TCM) Examination. Please choose the correct answer and provide a correct and reasonable answer analysis. Male, 73 years old, with a history of hypertension for 10 years and coronary heart disease for 8 years. 3 weeks ago, I had palpitations due to fright, I didn't sleep a lot, I ate a lot, I did…	B	D	The correct answer is: B.Shenfu Decoction and Guizhi Gancao Longgu Muli Decoction The patient is an elderly male with a history of long-term hypertension and coronary heart disease, restless palpitations after being frightened (history of palpitations), sleepless dreams, lack of food, pale tongue, and thin pulse (heart and gallbladder qi deficiency syndrome); Chest tightness and chest pain, short…	FALSE	YES	YES	NO		YES
59	single-choice question	Internal Medicine of TCM	The following is a single-choice question from the Chinese Comprehensive Ability of Clinical Medicine (TCM) Examination. Please choose the correct answer and provide a correct and reasonable answer analysis. Male, 22 years old. Fever for a week, the initial body temperature is about 38 °C, gradually rising to 39.8 °C, chills, strong fever does not go away, cough and shortness of breath, severe pa…	B	B	The correct answer is: B. Pulmonary carbuncle stage. The patient was a young male, with a fever of about 38 °C at the beginning, gradually rising to 39.8 °C, chills, strong fever that did not subside (suggesting that the evil heat is flourishing, and the evil is flourishing), coughing and shortness of breath, severe pain in the left chest (suggesting that the disease is located in the lungs), vom…	TRUE	YES	YES	YES
60	single-choice question	Internal Medicine of TCM	The following is a single-choice question from the Chinese Comprehensive Ability of Clinical Medicine (TCM) Examination. Please choose the correct answer and provide a correct and reasonable answer analysis. Male, 22 years old. Fever for a week, the initial body temperature is about 38 °C, gradually rising to 39.8 °C, chills, strong fever does not go away, cough and shortness of breath, severe pa…	C	C	The correct answer is C. Clear the lungs and detoxify, dissolve blood stasis and eliminate carbuncles. The patient's fever, cough, shortness of breath, severe pain in the left chest, vomiting a large amount of yellow-green sputum, red tongue, yellow greasy, and pulse number suggest pulmonary carbuncle caused by heat poison and blood stasis. Therefore, it is advisable to use the treatment method o…	TRUE	YES	YES	YES
61	single-choice question	Internal Medicine of TCM	The following is a single-choice question from the Chinese Comprehensive Ability of Clinical Medicine (TCM) Examination. Please choose the correct answer and provide a correct and reasonable answer analysis. Male, 22 years old. Fever for a week, the initial body temperature is about 38 °C, gradually rising to 39.8 °C, chills, strong fever does not go away, cough and shortness of breath, severe pa…	A	A	The correct answer is A.Shashen Qingfei Decoction. The patient's body heat gradually recedes, coughing up pus and blood decreases, the amount of phlegm decreases, the amount of food intake increases, self-sweating, shortness of breath, the tongue is red and white, and the pulse is thin (the physical strength has not been fully recovered, and the residual evil is not exhausted). Shashen Qingfei De…	TRUE	YES	YES	YES
62	single-choice question	Internal Medicine of TCM	The following is a single-choice question from the Chinese Comprehensive Ability of Clinical Medicine (TCM) Examination. Please choose the correct answer and provide a correct and reasonable answer analysis. Female, 42 years old. 5 days ago, he had pain in the right flank, traction on the shoulder and back, nausea and vomiting from time to time, and the pain was reduced after taking Chinese and W…	A	A	The correct answer is: A. Hypochondria. Female, 42 years old. 5 days ago, he had pain in the right flank, traction on the shoulder and back, nausea and vomiting from time to time, and the pain was reduced after taking Chinese and Western medicine. 1 day ago, the pain worsened, this morning there was body heat and chills, vomiting 1 time, specially came to the doctor (the hypochondria pain is most…	TRUE	YES	YES	YES
63	single-choice question	Internal Medicine of TCM	The following is a single-choice question from the Chinese Comprehensive Ability of Clinical Medicine (TCM) Examination. Please choose the correct answer and provide a correct and reasonable answer analysis. Female, 42 years old. 5 days ago, he had pain in the right flank, traction on the shoulder and back, nausea and vomiting from time to time, and the pain was reduced after taking Chinese and W…	C	C	The correct answer is C. Dampness and heat of the liver and gallbladder. Female, 42 years old. 5 days ago, he had pain in the right flank, traction on the shoulder and back, nausea and vomiting from time to time, and the pain was reduced after taking Chinese and Western medicine. The pain worsened 1 day ago, and this morning I had a hot and chilly body, vomiting 1 time, and I came to see a doctor…	TRUE	YES	YES	YES
64	single-choice question	Internal Medicine of TCM	The following is a single-choice question from the Chinese Comprehensive Ability of Clinical Medicine (TCM) Examination. Please choose the correct answer and provide a correct and reasonable answer analysis. Female, 42 years old. 5 days ago, he had pain in the right flank, traction on the shoulder and back, nausea and vomiting from time to time, and the pain was reduced after taking Chinese and W…	B	B	The correct answer is B. Longdan Xiegan Decoction plus or minus. Female, 42 years old. 5 days ago, he had pain in the right flank, traction on the shoulder and back, nausea and vomiting from time to time, and the pain was reduced after taking Chinese and Western medicine. The pain worsened 1 day ago, and this morning I had a hot and chilly body, vomiting 1 time, and I came to see a doctor. At the…	TRUE	YES	YES	YES
65	single-choice question	Internal Medicine of TCM	The following is a single-choice question from the Chinese Comprehensive Ability of Clinical Medicine (TCM) Examination. Please choose the correct answer and provide a correct and reasonable answer analysis. Female, 30 years old. Recently overworked, jaundice appeared 1 week ago. Symptoms include: yellow staining of the body and eyes, bright yellow, poor appetite, fatigue, dry mouth and bitter mo…	A	A	The correct answer is A. Damp heat fumigation, trapping the spleen and stomach, stagnation of the liver and gallbladder, and bile overflow. The patient has recently been overworked, with jaundice, bright yellow (a manifestation of jaundice), poor appetite, fatigue, dry mouth and bitter mouth, abdominal distention, constipation, short and yellow urine, poor sleep at night, red tongue, greasy yello…	TRUE	YES	YES	YES
66	single-choice question	Internal Medicine of TCM	The following is a single-choice question from the Chinese Comprehensive Ability of Clinical Medicine (TCM) Examination. Please choose the correct answer and provide a correct and reasonable answer analysis. Female, 30 years old. Recently overworked, jaundice appeared 1 week ago. Symptoms include: yellow staining of the body and eyes, bright yellow, poor appetite, fatigue, dry mouth and bitter mo…	C	D	The correct answer is C. Transporting the spleen and dissolving turbidity, clearing away heat and dampness. The patient is a 30-year-old female. Recently overworked, jaundice appeared 1 week ago. Symptoms include: yellow staining of the body and eyes, bright yellow, poor appetite, fatigue, dry mouth and bitter mouth, abdominal distention, constipation, short urine and yellow redness, poor night s…	FALSE	YES	YES	YES		YES
67	single-choice question	Internal Medicine of TCM	The following is a single-choice question from the Chinese Comprehensive Ability of Clinical Medicine (TCM) Examination. Please choose the correct answer and provide a correct and reasonable answer analysis. Female, 30 years old. Recently overworked, jaundice appeared 1 week ago. Symptoms include: yellow staining of the body and eyes, bright yellow, poor appetite, fatigue, dry mouth and bitter mo…	C	C	The correct answer is C.Yinchenhao Decoction. Female, 30 years old. Recently overworked, jaundice appeared 1 week ago. Symptoms include: yellow staining of the body and eyes, bright yellow, poor appetite, fatigue, dry mouth and bitter mouth, abdominal distention, constipation, short urine and yellow redness, poor night sleep, red tongue, greasy yellowishness, and slippery pulse. After a comprehen…	TRUE	YES	YES	YES
68	single-choice question	Acupuncture and Moxibustion	The following is a single-choice question from the Chinese Comprehensive Ability of Clinical Medicine (TCM) Examination. Please choose the correct answer and provide a correct and reasonable answer analysis. Female, 40 years old. Half a year ago, due to nervousness and tiredness, stomach discomfort, vomiting, and then vomiting and heating due to poor mood, vomiting and vomiting in recent days, sw…	D	A	The correct answer is: D. Foot Yin, Foot Taiyin meridian acupoint. The patient has stomach discomfort due to nervousness and fatigue, vomiting from time to time, and then vomiting and heating due to poor mood, vomiting and vomiting, swallowing acid and bitter mouth, pale red tongue, thin and white, and pulse. Based on its symptoms, the diagnosis is gastric pain. The etiology and pathogenesis of p…	FALSE	YES	YES	NO		YES
69	single-choice question	Acupuncture and Moxibustion	The following is a single-choice question from the Chinese Comprehensive Ability of Clinical Medicine (TCM) Examination. Please choose the correct answer and provide a correct and reasonable answer analysis. Female, 40 years old. Half a year ago, due to nervousness and tiredness, stomach discomfort, vomiting, and then vomiting and heating due to poor mood, vomiting and vomiting in recent days, sw…	B	B	The correct answer is B.CV6, PC6, ST36. Based on the patient's symptoms and signs, the diagnosis of gastric pain should be made. In acupuncture treatment, the main points that should be selected are CV6, PC6, ST36 (B right). CV6 is the recruitment acupoint of the stomach, PC6 is the acupoint of the Yin meridian of the hand, and ST36 is the meridian acupoint of Zuyangming, the combination of the t…	TRUE	YES	YES	YES
70	single-choice question	Acupuncture and Moxibustion	The following is a single-choice question from the Chinese Comprehensive Ability of Clinical Medicine (TCM) Examination. Please choose the correct answer and provide a correct and reasonable answer analysis. Female, 40 years old. Half a year ago, due to nervousness and tiredness, stomach discomfort, vomiting, and then vomiting and heating due to poor mood, vomiting and vomiting in recent days, sw…	D	D	The correct answer is D.CV11, SP9. For the symptoms of acid swallowing mentioned in the title, the main points that should be selected are CV11 and SP9. The CV11 acupoint is located on the anterior midline of the lower abdomen, which belongs to the Ren vein, and the SP9 acupoint is located on the medial edge of the foot, which belongs to the Zutai Yin and Spleen meridians. ST25, GB24RM17, SP7, ST…	TRUE	YES	YES	YES
71	single-choice question	Acupuncture and Moxibustion	The following is a single-choice question from the Chinese Comprehensive Ability of Clinical Medicine (TCM) Examination. Please choose the correct answer and provide a correct and reasonable answer analysis. Female, 48 years old. He came to the clinic for more than a month because of pain in his right shoulder. Onset is slow, with gradual worsening pain. The pain on the lateral side of the should…	A	B	The correct answer is A. Hand Yang Ming Sutra. The patient's right shoulder pain lasted for more than a month, with a slow onset and gradual worsening of the pain, mainly on the lateral side of the shoulder, obvious soreness, difficulty in abduction of the shoulder joint, and aggravation of exertion (the route of the Hand Yang Ming Sutra is the shoulder acupoint in the shoulder, and its soreness,…	FALSE	YES	YES	YES		YES
72	single-choice question	Acupuncture and Moxibustion	The following is a single-choice question from the Chinese Comprehensive Ability of Clinical Medicine (TCM) Examination. Please choose the correct answer and provide a correct and reasonable answer analysis. Female, 48 years old. He came to the clinic for more than a month because of pain in his right shoulder. Onset is slow, with gradual worsening pain. The pain on the lateral side of the should…	B	C	The correct answer is B.GB34. According to the patient's right shoulder pain for more than a month, the onset is slow, and the pain gradually worsens, mainly on the lateral side of the shoulder, with obvious soreness, difficulty in abduction of the shoulder joint, aggravation of fatigue (stagnation and blood stasis type shoulder paralysis), pale red tongue, thin white moss, and thin pulse (should…	FALSE	YES	YES	YES		YES
73	single-choice question	Acupuncture and Moxibustion	The following is a single-choice question from the Chinese Comprehensive Ability of Clinical Medicine (TCM) Examination. Please choose the correct answer and provide a correct and reasonable answer analysis. Female, 48 years old. He came to the clinic for more than a month because of pain in his right shoulder. Onset is slow, with gradual worsening pain. The pain on the lateral side of the should…	A	D	The correct answer is A.LI4, BL11. Female, 48 years old. He came to the clinic for more than a month because of pain in his right shoulder. Onset is slow, with gradual worsening pain. The pain on the outside of the shoulder is mainly present, the soreness is obvious, the shoulder joint is difficult to abduct, the exertion is aggravated (qi stagnation and blood stasis type shoulder paralysis), the…	FALSE	YES	YES	YES		YES
74	single-choice question	Humanistic Spirit of Medicine	The following is a single-choice question from the Chinese Comprehensive Ability of Clinical Medicine (TCM) Examination. Please choose the correct answer and provide a correct and reasonable answer analysis. The medical profession is a medical community that is accountable to the commitment expected of the public, and the following statements are incorrect: A. The medical profession does not requ…	A	A	The correct answer is: A. The medical profession does not require systematic training. The medical profession requires systematic training, the medical profession requires self-discipline from the professional community, and the medical profession maintains professional integrity through a strict admission system. Therefore, option A is selected for this question.	TRUE	YES	YES	NO
75	single-choice question	Humanistic Spirit of Medicine	The following is a single-choice question from the Chinese Comprehensive Ability of Clinical Medicine (TCM) Examination. Please choose the correct answer and provide a correct and reasonable answer analysis. What is not part of the patient's obligation in the doctor-patient relationship is () A. The patient has the obligation to truthfully inform the doctor about the condition B. The patient has …	D	D	The correct answer is D. The patient has an obligation to follow even unnecessary treatment. In the doctor-patient relationship, Patients have the following obligations: 1. Patients have the obligation to truthfully inform the doctor of their condition (Pair A), if they conceal their condition, it may affect the doctor's accurate diagnosis and treatment plan; 2. The patient has the obligation to …	TRUE	YES	YES	YES
76	single-choice question	Humanistic Spirit of Medicine	The following is a single-choice question from the Chinese Comprehensive Ability of Clinical Medicine (TCM) Examination. Please choose the correct answer and provide a correct and reasonable answer analysis. Due to the inequality of medical knowledge between doctors and patients, patients are in a vulnerable position and rely on doctors. Patients entrust their health and life to medical staff, so…	B	B	The correct answer is B. Trust relationship. The doctor-patient relationship is a trust relationship rather than a consumption relationship, dependency relationship or contractual relationship. Due to the inequality of medical knowledge between doctors and patients, patients are in a vulnerable position and rely on doctors. Patients entrust their health and life to medical staff, so medical staff…	TRUE	YES	YES	NO
77	single-choice question	Humanistic Spirit of Medicine	The following is a single-choice question from the Chinese Comprehensive Ability of Clinical Medicine (TCM) Examination. Please choose the correct answer and provide a correct and reasonable answer analysis. Male, 35 years old. Because the radial shaft fracture was treated with plate internal fixation, the plate broke 3 months after operation, and the patient asked the hospital for compensation. …	D	D	The correct answer is D. Tell the patient that it is a steel plate quality problem and the hospital is not responsible for handling it. For this patient, the hospital should not directly inform the patient that it is a quality problem of the steel plate and is not responsible for handling it. It should first understand the relevant situation of the steel plate fracture in detail, analyze the caus…	TRUE	YES	YES	NO
78	single-choice question	Humanistic Spirit of Medicine	The following is a single-choice question from the Chinese Comprehensive Ability of Clinical Medicine (TCM) Examination. Please choose the correct answer and provide a correct and reasonable answer analysis. It is an important clinical ethical principle to keep secrets for patients, and it is the obligation of doctors to protect patients' medical information. The following behaviors of doctors ca…	D	D	The correct answer is D. Provide authorized anonymous medical research information to peers upon request. In medical activities, the patient's medical information, including the patient's condition, medical history, diagnostic methods, treatment plans, examination results, nursing records, etc., belongs to the patient's privacy and should be protected. It is against ethical principles and legal p…	TRUE	YES	YES	YES
79	single-choice question	Humanistic Spirit of Medicine	The following is a single-choice question from the Chinese Comprehensive Ability of Clinical Medicine (TCM) Examination. Please choose the correct answer and provide a correct and reasonable answer analysis. What is incorrect about the ethics of informed consent principle is () A. The ethical requirements of informed consent should fully respect the principle of patient autonomy B. Informed conse…	B	B	The correct answer is B. The principle of informed consent refers to that in the process of medical services, the doctor informs the patient of the true information about medical services, and the patient independently makes a decision on whether to choose the medical services. The ethical requirements of informed consent include respect for the principle of patient autonomy, the doctor's obligat…	TRUE	YES	YES	YES
80	single-choice question	Humanistic Spirit of Medicine	The following is a single-choice question from the Chinese Comprehensive Ability of Clinical Medicine (TCM) Examination. Please choose the correct answer and provide a correct and reasonable answer analysis. According to the ethical principles of clinical medical trial design, the following statements are correct () A. Experimental design should benefit both subjects and Society B. Experimental d…	A	C	The correct answer is A. The trial design should benefit both subjects and society. According to the ethical principles of clinical medical trial design, the trial design should benefit both the subjects and the society (a right), weigh the benefit and risk ratio, and should benefit both the subjects and the society, rather than directly benefit the subjects (B wrong). The risk of the test should…	FALSE	YES	YES	YES	YES	YES
81	single-choice question	Humanistic Spirit of Medicine	The following is a single-choice question from the Chinese Comprehensive Ability of Clinical Medicine (TCM) Examination. Please choose the correct answer and provide a correct and reasonable answer analysis. Female, 23 years old. After 7 weeks of pregnancy, she went to a clinic to ask for artificial abortion. The clinic arranged to employ Wang to perform the operation for him. Due to improper ope…	D	D	The correct answer is D. Investigate criminal responsibility according to law. According to the provisions of the doctors' law, non doctors who practice medicine shall be banned by the health administration department of the people's government at or above the county level, their illegal income, drugs and instruments shall be confiscated, and a fine of less than 100000 yuan shall be imposed; Revo…	TRUE	YES	YES	NO
82	single-choice question	Basic Theory of TCM	The following is a single-choice question from the Chinese Comprehensive Ability of Clinical Medicine (TCM) Examination. Please choose the correct answer and provide a correct and reasonable answer analysis. Reflecting the 'Wind moves' () A. The location of the disease is uncertain. B. It has the characteristics of ascending and dispersing. C. It often hurts people with other pathogenic factors. …	A	A	The correct answer is A. The location of the disease is uncertain. Pathogenic wind has the characteristics of opens, disperses, floats, ascends, moves and changes swiftly. Therefore, it is the location of the disease is uncertainn that reflects the 'Wind moves' (A right). The characteristic of pathogenic wind with ascending and dispersing (B wrong) is that pathogenic wind is easy to invade the up…	TRUE	YES	YES	YES
83	single-choice question	Basic Theory of TCM	The following is a single choice question about the comprehensive ability of clinical medicine (traditional Chinese Medicine) test in China. Please choose the correct answer and generate a correct and reasonable answer analysis. What shows that 'Wind is the leading cause of diseases' is () A. The location of the disease is uncertain. B. It has the characteristics of ascending and dispersing. C. I…	C	C	The correct answer is C. It often hurts people with other pathogenic factors. Wind is the leading cause of diseases, which means that pathogenic wind is often combined with other pathogenic qi into diseases, such as wind cold, wind heat, wind dampness, etc. Therefore, the option to reflect that wind is the leading cause of diseases should be to often hurt people with its evil (C right). The wande…	TRUE	YES	YES	YES
84	single-choice question	Basic Theory of TCM	The following is a single-choice question from the Chinese Comprehensive Ability of Clinical Medicine (TCM) Examination. Please choose the correct answer and provide a correct and reasonable answer analysis. It is pointed out in Suwen, on the biography of specimen diseases that "the person who is ill first and then full in middle" should () A. Treat the tip B. Treat the root C. Treat both the tip…	A	A	The correct answer is: A. Suwen pointed out that "those who are ill first and then born with moderate fullness" should treat their symptoms (A right), that is, treat moderate fullness first and then treat the main disease. If the disease occurs at the same time as the main disease, the tip and root should be treated together (C wrong). "Initial treatment for preliminary dosease" (D wrong) is to t…	TRUE	YES	YES	YES
85	single-choice question	Basic Theory of TCM	The following is a single-choice question from the Chinese Comprehensive Ability of Clinical Medicine (TCM) Examination. Please choose the correct answer and provide a correct and reasonable answer analysis. It is pointed out in Suwen, on the transmission of diseases in specimens that "the person who is hot first and then full in life" should () A. Treat the tip B. Treat the root C. Treat both th…	A	A	The correct answer is A. Treat the tip. Suwen pointed out that "those who are hot first and then born with moderate fullness" should treat the tip (A right), that is, treat moderate fullness first and then treat the main disease. This is because in the process of disease development, heat syndrome first appears, and then moderate fullness occurs, indicating that moderate fullness is urgent, and h…	TRUE	YES	YES	YES
86	single-choice question	Diagnostics of TCM	The following is a single-choice question from the Chinese Comprehensive Ability of Clinical Medicine (TCM) Examination. Please choose the correct answer and provide a correct and reasonable answer analysis。 The patient with spleen deficiency and dampness can see the complexion () A.Pale yellow complexion B.Pale yellow and floating C. Pale yellow in the green D. Pale dull as smoke	A	B	The correct answer is A. Pale yellow complexion. Patients with spleen deficiency and dampness, due to the decline of the function of the spleen and stomach, the ability to transport water and dampness is decreased, the water and dampness are stopped within, and the qi and blood are insufficient, so the complexion is pale yellow and not smooth (A right). Pale yellow face and floating (B mistake) f…	FALSE	YES	YES	YES		YES
87	single-choice question	Diagnostics of TCM	The following is a single-choice question from the Chinese Comprehensive Ability of Clinical Medicine (TCM) Examination. Please choose the correct answer and provide a correct and reasonable answer analysis。 Patients with cold dampness trapped spleen can see the facial color () A. Pale yellow complexion B. pale yellow and floating C. yellow complexion with green color D. His face was dull and smo…	A	D	he correct answer is A. Pale and dull. Patients with cold dampness trapped spleen, due to cold dampness stop, affect the function of the spleen and stomach, water and dampness can not be normally transferred, and there is insufficient Qi and blood, so the complexion is pale yellow (A right). Pale yellow face and floating (B mistake) for qi and blood deficiency. Yellow complexion with green comple…	FALSE	YES	YES	YES		YES
88	single-choice question	Diagnostics of TCM	The following is a single-choice question from the Chinese Comprehensive Ability of Clinical Medicine (TCM) Examination. Please choose the correct answer and provide a correct and reasonable answer analysis。 Amenorrhea infertility, hair loss teeth shaking, tinnitus amnesia, the diagnosis is () A. Kidney essence deficiency syndrome B. Kidney Yang deficiency syndrome C. kidney Yin deficiency syndro…	A	A	The correct answer is A. Kidney essence deficiency syndrome. Amenorrhea, infertility, toothless shaking, tinnitus and forgetfulness are the manifestations of insufficient kidney essence. Kidney essence deficiency syndrome is kidney essence deficit, brain dystrophia, dizziness tinnitus, waist and knee sourness, toothless shaking, amenorrhea infertility, children five late five soft, fontanel not c…	TRUE	YES	YES	YES
89	single-choice question	Diagnostics of TCM	The following is a single-choice question from the Chinese Comprehensive Ability of Clinical Medicine (TCM) Examination. Please choose the correct answer and provide a correct and reasonable answer analysis。 Amenorrhea infertility, vertigo tinnitus, hot flushes night sweats, the diagnosis is () A. Kidney essence deficiency syndrome B. Kidney Yang deficiency syndrome C. kidney Yin deficiency syndr…	C	C	The correct answer is C. Kidney Yin deficiency syndrome. Amenorrhea, infertility, vertigo, tinnitus, hot flashes and night sweats are the manifestations of kidney Yin deficiency. Kidney Yin deficiency syndrome refers to the syndrome of kidney Yin loss, loss in nourishing, deficiency heat endogenous, mostly caused by chronic illness, lack of endowment, excessive sex, or overtaking of warm dry and …	TRUE	YES	YES	YES
90	single-choice question	Pharmacology of TCM	The following is a single-choice question from the Chinese Comprehensive Ability of Clinical Medicine (TCM) Examination. Please choose the correct answer and provide a correct and reasonable answer analysis。 The Common effect of Leonurus and Achyranthes () A. Activating blood and regulating menstruation, dissolving water B. channeling milk through menstruation, diuresis and relieving drenching C.…	A	A	The correct answer is A. Promoting blood circulation and regulating menstruation to relieve water. Motherwort and achyranthes heterophyllum have the effect of activating blood and regulating menstruation and reducing water. Activating blood to regulate menstruation is mainly applicable to women's menstrual irregularities, amenorrhea dysmenorrhea and other symptoms. The water is suitable for unfav…	TRUE	YES	YES	YES
91	single-choice question	Pharmacology of TCM	The following is a single-choice question from the Chinese Comprehensive Ability of Clinical Medicine (TCM) Examination. Please choose the correct answer and provide a correct and reasonable answer analysis。 Mutong and Wang do not have the same effect () A. Activating blood and regulating menstruation, dissolving water B. channeling milk through menstruation, diuresis and relieving drenching C. A…	B	B	The correct answer is B. through menstruation, through milk, through diuresis. Both Mutong and Wang Jiuxing have the effect of channeling menstruation and milk and diuresis. Following the menstruation is suitable for women's postpartum milk obstruction, and diuretic ventilation is suitable for adverse urination. So the answer is B.	TRUE	YES	YES	YES
92	single-choice question	Pharmacology of TCM	The following is a single-choice question from the Chinese Comprehensive Ability of Clinical Medicine (TCM) Examination. Please choose the correct answer and provide a correct and reasonable answer analysis。 Can not only relieve pain, but also warm stop vomiting is () A. Wood fragrance B. Agarwood C. Incense and D. Aconitum	A	B	"The correct answer is A. wood fragrance. Wood fragrance can not only relieve pain, but also warm and stop vomiting (A right). Agarwood (B wrong) can relieve the pain of qi, warm and stop vomiting, reduce qi and relieve asthma. Xiangfu (C wrong) can relax the liver and relieve depression, regulate menstrual flow and relieve pain. Aconite (D wrong) can relieve pain by Qi, warm kidney and dispel co…	FALSE	YES	YES	YES	YES	YES
93	single-choice question	Pharmacology of TCM	The following is a single-choice question from the Chinese Comprehensive Ability of Clinical Medicine (TCM) Examination. Please choose the correct answer and provide a correct and reasonable answer analysis。 Can not only line qi pain, but also warm kidney to dispel cold is () A. Wood fragrance B. Agarwood C. Incense and D. Aconitum	D	D	"The correct answer is D. black medicine. Aconite can not only promote qi and relieve pain, but also warm kidney and dispel cold (D right). Wood fragrance (A wrong) can be qi analgesic, spleen digestion. Agarwood (B wrong) can relieve the pain of qi, warm and stop vomiting, reduce qi and relieve asthma. Xiangfu (C wrong) can relax the liver and relieve depression, regulate the menstrual flow and …	TRUE	YES	YES	YES
94	single-choice question	Formulas of TCM	The following is a single-choice question from the Chinese Comprehensive Ability of Clinical Medicine (TCM) Examination. Please choose the correct answer and provide a correct and reasonable answer analysis。 What is contained in Dachaihu Decoction and what is not in Xiaochaihu Decoction () A. Peony B. Pinellia C. Ginger D. licorice	A	A	"The correct answer is A. Peony. Big bupleurum decoction and small bupleurum decoction are commonly used formulae of traditional Chinese medicine. They have different components. Large bupleuri Decoction contains peony (A right), while small bupleuri Decoction does not. Xiao Bupleuri Decoction contains pinellia (B wrong), ginger (C wrong), licorice (D wrong), but does not contain peony.	TRUE	YES	YES	NO
95	single-choice question	Formulas of TCM	The following is a single-choice question from the Chinese Comprehensive Ability of Clinical Medicine (TCM) Examination. Please choose the correct answer and provide a correct and reasonable answer analysis。 Xiaoxianxiong Decoction contains and Daxianxiong Decoction does not contain () A. Peony B. Pinellia C. Ginger D. licorice	B	B	"The correct answer is B. Pinellia. There are some differences in the composition of small and large breast Decoction . Among them, the small trap chest Decoction contains pinellia (B right), while the big trap chest Decoction does not. The Decoction contains peony (A mistake), ginger (C mistake) and licorice (D mistake), but does not contain pinellia.	TRUE	YES	YES	NO
96	single-choice question	Formulas of TCM	The following is a single-choice question from the Chinese Comprehensive Ability of Clinical Medicine (TCM) Examination. Please choose the correct answer and provide a correct and reasonable answer analysis。 The etiology and pathogenesis of treating syndrome of Qinhao Biejia decoction are () A. Yin blood deficiency, wind evil spread in heat B. liver and kidney Yin deficiency, weak fire internal i…	C	C	"The correct answer is C. In the later stage of febrile disease, Yin fluid is consumed, and evil Fu Yin points. The indications of Qinghao Biejia decoction are late stage of febrile disease, night heat and early cooling, heat withdrawal without sweating, red tongue with little skin, thin pulse, etc. The etiology and pathogenesis of this decoction are late stage of febrile disease, depletion of Yi…	TRUE	YES	YES	YES
97	single-choice question	Formulas of TCM	The following is a single-choice question from the Chinese Comprehensive Ability of Clinical Medicine (TCM) Examination. Please choose the correct answer and provide a correct and reasonable answer analysis。 The etiology and pathogenesis of treating syndromes of Gentiana Biejia powder are () A. Yin blood deficiency, wind evil spread in heat B. liver and kidney Yin deficiency, weak fire internal i…	C	A	"The correct answer is C. In the later stage of febrile disease, Yin fluid is consumed, and evil Fu Yin points. The main symptoms of Gentiana are late tidal heat, muscle thinness, night sweat, night heat and early cold, red tongue with little moss, thin pulse, etc. The etiology and pathogenesis of Gentiana are late stage of febrile disease, depletion of Yin fluid, and pathogenic Yin (C right). An…	FALSE	YES	YES	YES		YES
98	single-choice question	Internal Medicine of TCM	The following is a single-choice question from the Chinese Comprehensive Ability of Clinical Medicine (TCM) Examination. Please choose the correct answer and provide a correct and reasonable answer analysis。 Male, 27 years old. In the middle of winter, when I go out to work, I have sudden asthma, shortness of breath, cough, thin white sputum, cold headache, pale red tongue and thin white fur, and…	D	D	"The correct answer is D. ephedra Decoction . In the middle of winter, patients go out to work, sudden asthma, shortness of breath, cough, phlegm more and less white, cold headache, light red tongue and thin white coat, pulse floating tight (cold syndrome), according to the symptoms, should be diagnosed as external cold internal drink syndrome, should choose ephedrine decoction (D right) treatmen…	TRUE	YES	YES	YES
99	single-choice question	Internal Medicine of TCM	The following is a single-choice question from the Chinese Comprehensive Ability of Clinical Medicine (TCM) Examination. Please choose the correct answer and provide a correct and reasonable answer analysis。 Male, 42 years old, midsummer, long blowing air conditioning, sudden asthma, phlegm, thick yellow, cold body heat, no sweat, tongue red fur yellow, pulse floating and number. cure Use () A. M…	A	A	"The correct answer is A. Maxingshigan Decoction. In the summer season, the patient blew air conditioning for A long time, sudden asthma, phlegm, phlegm thick yellow, cold body heat, no sweat, red tongue yellow, pulse slippery and several (wind heat attack lung syndrome), so the treatment should choose Maxingshigan decoction (A right). Ephedra Decoction (D wrong) treating wind-cold invading lung …	TRUE	YES	YES	YES
100	single-choice question	Internal Medicine of TCM	The following is a single-choice question from the Chinese Comprehensive Ability of Clinical Medicine (TCM) Examination. Please choose the correct answer and provide a correct and reasonable answer analysis。 Dementia is a deficiency of the sea of pulp, treatment should be selected () A. Qifu Yin B. Zuogui Wan C. Huanhao Dan D. Bazhen Decoction	A	A	"The correct answer is A. Seven blessed drinks. The clinical manifestations of dementia and insufficient myelin sea are mainly dizziness, tinnitus, mental decline, waist and knee weakness, forgottenness, slow speech, slow movement, thin tongue and thin pulse. Treating the kidney filling essence, filling the brain Rong heart, with seven Fu drink (A right). Qifu drink is composed of ginseng, white …	TRUE	YES	YES	YES
101	single-choice question	Internal Medicine of TCM	The following is a single-choice question from the Chinese Comprehensive Ability of Clinical Medicine (TCM) Examination. Please choose the correct answer and provide a correct and reasonable answer analysis. Dementia belongs to the deficiency of the spleen and kidney pattern. The treatment should choose: A. Qifu Decoction (Qifu Yin) B. Zuo Gui Wan (Zuo Gui Wan) C. Huanshao Pellet (Huanshao Dan) D…	A	C	The correct answer is A. Qifu Decoction (Qifu Yin). The clinical manifestations of dementia with deficiency of the spleen and kidney pattern are mainly characterized by mental depression, indifferent expression, dizziness and vertigo, soreness and weakness in the waist and knees, spermatorrhea and impotence, cold limbs and frequent urination, poor appetite with excessive phlegm, drooling of phleg…	FALSE	YES	YES	YES		YES
102	single-choice question	Acupuncture and Moxibustion	The following is a single-choice question from the Chinese Comprehensive Ability of Clinical Medicine (TCM) Examination. Please choose the correct answer and provide a correct and reasonable answer analysis Select the acupuncture points Ashi point, local meridian points, Yinlingquan(SP9), and Zusanli(ST36) for the treatment of the following condition: A. Migratory impediment B. Fixed impediment C…	C	B	The correct answer is C. Painful impediment. The acupuncture points Ashi, local meridian points, Yinlingquan(SP9), and Zusanli(ST36) are used to treat Painful impediment (C is correct). For Migratory impediment (A is incorrect), Dazhui acupoint should be the primary choice. For Fixed impediment (B is incorrect), Yinlingquan(SP9) should be the primary choice. For Heat impediment (D is incorrect), …	FALSE	YES	YES	YES		YES
103	single-choice question	Acupuncture and Moxibustion	The following is a single-choice question from the Chinese Comprehensive Ability of Clinical Medicine (TCM) Examination. Please choose the correct answer and provide a correct and reasonable answer analysis. The disease condition treated by selecting Ashi point, local meridian points, Spleen Transverse Meridian Point and the Sea of Blood is ( ) A. Migratory impediment B. Fixed impediment C. Painf…	C	A	The correct answer is C. Painful impediment. The condition treated by Ashi point, local meridian points, Spleen Transverse Meridian Point and the Sea of Blood is Painful impediment (C correct). Painful impediment is due to the internal invasion of wind, cold and dampness, which flows into the joints and blocks qi and blood, resulting in severe pain and unfavorable movement of the joints. Ashi poi…	FALSE	YES	YES	YES		YES
104	single-choice question	Acupuncture and Moxibustion	The following is a single-choice question from the Chinese Comprehensive Ability of Clinical Medicine (TCM) Examination. Please choose the correct answer and provide a correct and reasonable answer analysis. Of the following acupuncture points, both of them are located 2 inches away from the anterior midline ( ) A. Kufang(ST14), Zhangmen(LR13) B. Shenshu(BL23), Tianzhu(BL10) C. Zhishi(BL52), Zhib…	D	D	The correct answer is D. Liangmen(ST21), Tianshu(ST25). The 2-inch opening next to the anterior midline is an acupoint of the The stomach meridian of foot-Yangming, so Liangmen(ST21) and Tianshu(ST25) are chosen as the acupuncture points located here (D right). Kufang(ST14) and Zhangmen(LR13) (A wrong) are both located 4 inches beside the anterior midline and belong to the acupuncture points of t…	TRUE	YES	YES	YES
105	single-choice question	Acupuncture and Moxibustion	The following is a single-choice question from the Chinese Comprehensive Ability of Clinical Medicine (TCM) Examination. Please choose the correct answer and provide a correct and reasonable answer analysis. Of the following acupuncture points, both of them are located 3 inches away from the anterior midline ( ) A. Kufang(ST14), Zhangmen(LR13) B. Shenshu(BL23), Tianzhu(BL10) C. Zhishi(BL52), Zhib…	C	C	The correct answer is C. Zhishi(BL52), Zhibian(BL54). The 3-inch opening next to the posterior midline is an acupoint of the bladder meridian of foot-Taiyang, and Zhishi(BL52) and Zhibian(BL54) are both located in this position, so choose C (C is correct). Kufang(ST14) and Zhangmen(LR13) (A wrong) are both located 4 inches off the posterior midline and are points of the pericardium meridian of ha…	TRUE	YES	YES	YES
106	multiple-choice question	Basic Theory of TCM	The following is a multiple-choice question from the Chinese Comprehensive Ability of Clinical Medicine (TCM) Examination. For each sub-question, there are four options labeled A, B, C, and D, among which at least two meet the requirements of the question. Please choose the correct answers and generate a correct and reasonable answer analysis. The following narratives reflect that the human body …	CD	ABCD	The correct answer is CD. The unity of body and mind and “what is inside must come out”. The human body is an organic whole, embodied in many ways. Among them, the concept of the unity of the five organs refers to the interconnection and coordination between the various organs of the human body, which is a manifestation of the wholeness of the human body. The question asks to reflect the human bo…	FALSE	YES	YES	YES	YES
107	multiple-choice question	Basic Theory of TCM	The following is a multiple-choice question from the Chinese Comprehensive Ability of Clinical Medicine (TCM) Examination. For each sub-question, there are four options labeled A, B, C, and D, among which at least two meet the requirements of the question. Please choose the correct answers and generate a correct and reasonable answer analysis. Related to the theory of yin-yang interdependency is …	AB	AB	The correct answer is A and B. Interdependency of yin and yang is an important part of the yin-yang theory, which refers to the mutual rooting and using of yin and yang; yang is rooted in yin, yin is rooted in yang, yang is born in yin, yin is born in yang, yang can't exist without yin, and yin can't be born without yang. Impairment of yin affecting yang refers to the accumulation of yang damage …	TRUE	YES	YES	YES
108	multiple-choice question	Basic Theory of TCM	The following is a multiple-choice question from the Chinese Comprehensive Ability of Clinical Medicine (TCM) Examination. For each sub-question, there are four options labeled A, B, C, and D, among which at least two meet the requirements of the question. A malfunction of the spleen's ascending function is ( ) A. Nausea and vomiting B. Abdominal swelling C. Prolonged diarrhea and prolapse D. Sub…	C	BC	The correct answer is C. prolonged diarrhea and prolapse. Malfunction of the spleen's ascending function is often manifested by prolonged diarrhea and prolapse of the anus, prolapse of the viscera, failure of the clear yang to ascend and of the turbid yin to descend, and so on. Therefore, option C is correct. Nausea and vomiting is a manifestation of turbid evils disturbing the clear orifices, wh…	FALSE	YES	YES	YES	YES
109	multiple-choice question	Basic Theory of TCM	The following is a multiple-choice question from the Chinese Comprehensive Ability of Clinical Medicine (TCM) Examination. For each sub-question, there are four options labeled A, B, C, and D, among which at least two meet the requirements of the question. The relationship between the lungs and the kidneys is manifested as ( ) A. Promoting blood movement B. Respiratory movement C. Participating i…	BD	BCD	The correct answer is BD. The relationship between the lungs and the kidneys is mainly characterized by respiratory movement, metabolism of water and fluid and mutual nourishment of yin and fluids. Specifically, the lungs are responsible for respiration and the kidneys are responsible for qi, and they work together to maintain respiratory movement; the lungs are the upper source of water, and the…	FALSE	YES	YES	NO	YES
110	multiple-choice question	Basic Theory of TCM	The following is a multiple-choice question from the Chinese Comprehensive Ability of Clinical Medicine (TCM) Examination. For each sub-question, there are four options labeled A, B, C, and D, among which at least two meet the requirements of the question. About ying-nutrient qi, the correct is ( ) A. the nature of plagiarism and slippery B. sprinkled in the six fu-organs C. generated by the esse…	AD	BCD	The correct answer is AD. Ying-nutrient qi is produced by the essence of water and food, and is harmonized in the five organs and operates in the blood vessels, and is the essential essence for the vital activities of the human body. The nature of ying-nutrient qi is swift and slippery, and its physiological functions are carried out in the blood, embodied in the veins, with a nutritional effect.…	FALSE	YES	YES	YES		YES
111	multiple-choice question	Basic Theory of TCM	The following is a multiple-choice question from the Chinese Comprehensive Ability of Clinical Medicine (TCM) Examination. For each sub-question, there are four options labeled A, B, C, and D, among which at least two meet the requirements of the question. The following statement about the twelve divergent collaterals is correct ( ) A. There is no fixed relationship with the internal organs B. Th…	BCD	ABCD	The correct answer is: BCD. Twelve divergent collaterals (BC right) from the twelve meridians divided from the larger collaterals, also known as the "great collaterals (Da Luo)", are from the limbs below the elbow and knee joints (D right), communicating the interior and exterior meridians, governing and maintaining body's qi and blood. There is a certain regularity in the circulation of the twel…	FALSE	YES	YES	YES	YES	YES
112	multiple-choice question	Basic Theory of TCM	The following is a multiple-choice question from the Chinese Comprehensive Ability of Clinical Medicine (TCM) Examination. For each sub-question, there are four options labeled A, B, C, and D, among which at least two meet the requirements of the question. According to "Su Wen - Wu Zang Generation", "eating too much sweetness" can lead to ( ) A. pain in bones and joints B. obesity C. dryness of m…	ABD	AD	The correct answer is ABD. According to "Plain Questions - Five Zang Generation", "eating a lot of sweet" will lead to spleen qi deficiency, which in turn affects the metabolism of water and liquid and leads to water-dampness retention internally and if water-dampness flow into the joints of the limbs will result in pain in the bones and joints (A is right); water-dampness retention and thawless …	FALSE	YES	YES	YES	YES	YES
113	multiple-choice question	Basic Theory of TCM	The following is a multiple-choice question from the Chinese Comprehensive Ability of Clinical Medicine (TCM) Examination. For each sub-question, there are four options labeled A, B, C, and D, among which at least two meet the requirements of the question. The following about "internal dryness" statement, the correct is ( ) A. The onset of the disease is mostly in the autumn B. Mostly due to malf…	BC	BCD	The correct answer is BC. Internal dryness refers to the yin deficiency pattern caused by the dysfunction of zang-fu organs and body fluid deficiency, as opposed to external dryness. Internal dryness is mostly caused by the pathogenic heat, or the loss of yin and fluid due to prolonged illness, or too much sweating, or blood deficiency that cannot nourish the body. Internal dryness lesions to the…	FALSE	YES	YES	YES	YES
114	multiple-choice question	Basic Theory of TCM	The following is a multiple-choice question from the Chinese Comprehensive Ability of Clinical Medicine (TCM) Examination. For each sub-question, there are four options labeled A, B, C, and D, among which at least two meet the requirements of the question. The following is correct in the description of the seven emotions that cause disease and directly injure internal organs ( ) A. first affect t…	AC	ABCD	The correct answer is AC. The seven emotions of internal injury refers to joy, anger, sorrow, sadness, fear and panic and other emotional activities beyond the normal range or due to emotional stimulation is too strong, more than the body itself can regulate the limit, resulting in the body's qi disorders, thus producing a series of clinical symptoms. Seven emotions of internal injuries are chara…	FALSE	YES	YES	YES	YES
115	multiple-choice question	Basic Theory of TCM	The following is a multiple-choice question from the Chinese Comprehensive Ability of Clinical Medicine (TCM) Examination. For each sub-question, there are four options labeled A, B, C, and D, among which at least two meet the requirements of the question. Of the following, the one that belongs to the treatment of yang deficiency is () A. treating yang for yin patterns B. seeking yang from yin C.…	B	ABC	The correct answer is: B. seeking yang from yin. Yang deficiency refers to the pathological state in which the organism's yang qi is deficient, warmth is insufficient, uterine cold is prevalent within the body, function is reduced, yang fails to restrain yin, and yin is relatively hyperactive, and deficiency cold is generated within the body. Its pathogenesis is characterized by deficiency of yan…	FALSE	YES	YES	YES	YES	YES
116	multiple-choice question	Diagnostics of TCM	The following is a multiple-choice question from the Chinese Comprehensive Ability of Clinical Medicine (TCM) Examination. For each sub-question, there are four options labeled A, B, C, and D, among which at least two meet the requirements of the question. Of the following, a hypothermia can result from A. Qi deficiency B. Fluid retention C. Yin deficiency D. Qi stagnation	C	ACD	The correct answer is: C. Yin deficiency. Yin deficiency (C correct) can lead to hypothermia. Qi deficiency (A wrong) is commonly characterized by shortness of breath and low voice, tiredness, fatigue, poor appetite, and loose stools, and usually does not result in hypothermia. Fluid retention (B) refers to the internal suspension of water and fluid, which stays in the stomach and intestines and …	FALSE	YES	YES	YES		YES
117	multiple-choice question	Diagnostics of TCM	The following is a multiple-choice question from the Chinese Comprehensive Ability of Clinical Medicine (TCM) Examination. For each sub-question, there are four options labeled A, B, C, and D, among which at least two meet the requirements of the question. The following pulse phenomena belong to the physiological variation of the pulse () A. Six yin pulse B. Deep pulse in obese people C. Floating…	B	ABCD	The correct answer is: B. Deep pulse occurs in obese people. Physiologic variations of the pulse include physiologic pulse and its influencing factors, and individual physiologic variations. Physiological pulse and its influencing factors include body position, climate, age, sex, emotion, labor, body type, menstruation and pregnancy, etc. For example, an obese person (B right) has a sinking pulse…	FALSE	YES	YES	YES		YES
118	multiple-choice question	Diagnostics of TCM	The following is a multiple-choice question from the Chinese Comprehensive Ability of Clinical Medicine (TCM) Examination. For each sub-question, there are four options labeled A, B, C, and D, among which at least two meet the requirements of the question. The pulse signs that can be seen in a deficiency pattern are () A. fine pulse B. arterial pulsation C. tympanic pulse D. racing pulse	A	ACD	"The correct answer is: A. Fine pulse. The main pulse signs of deficiency patterns are fine pulse (A right), deficient pulse, soggy pulse, weak pulse, and late pulse, etc., and they reflect that qi and blood are deficient and yang qi is insufficient. The main pulse signs of excess patterns are excess pulse, surging pulse, wiry pulse, tight pulse, skipping pulse, and rapid pulse, etc., and they ma…	FALSE	YES	YES	YES		YES
119	multiple-choice question	Diagnostics of TCM	The following is a multiple-choice question from the Chinese Comprehensive Ability of Clinical Medicine (TCM) Examination. For each sub-question, there are four options labeled A, B, C, and D, among which at least two meet the requirements of the question. The following options can lead to a stiff tongue () A. Cold congealing the sinews B. Heat entering the pericardium C. Wind phlegm entering the…	C	BCD	The correct answer is: C. Wind phlegm entering the meridians pattern A stiff tongue is most often caused by the internal uterine cold, or the excess yang heat, or wind phlegm entering the meridians pattern (C correct). Cold congealing the sinews (A wrong) may cause contractures. Heat entering the pericardium (B wrong) and Exuberant heat damaging fluids (D wrong) can be seen in flaccid tongue."	FALSE	YES	YES	YES		YES
120	multiple-choice question	Diagnostics of TCM	The following is a multiple-choice question from the Chinese Comprehensive Ability of Clinical Medicine (TCM) Examination. For each sub-question, there are four options labeled A, B, C, and D, among which at least two meet the requirements of the question. The following are characteristics of "stomach reflux": () A. Eating in the morning and vomiting in the evening B. Eating in the evening and vo…	AB	AB	The correct answers are A and B. Stomach reflux is characterized by "Vomit in the evening after eating in the morning, and vomit in the morning after eating in the evening." (A is right, B is right, and C is wrong). Retching without vomiting is a symptom of yin deficiency of the spleen and stomach and qi deficiency of the spleen and stomach in deficiency, and is not a characteristic of stomach re…	TRUE	YES	YES	YES
121	multiple-choice question	Diagnostics of TCM	The following is a multiple-choice question from the Chinese Comprehensive Ability of Clinical Medicine (TCM) Examination. For each sub-question, there are four options labeled A, B, C, and D, among which at least two meet the requirements of the question. Please choose the correct answers and generate a correct and reasonable answer analysis The following is () A. Aversion to cold and fever, hea…	A	ACD	The correct answer is: A. aversion to cold and fever, head and body pain, abdominal pain and warmth, vomiting and diarrhea. External and internal disease refers to the new disease in the inside, the compound feeling of external evil, or the original disease in the surface, the repeated feeling of internal evil, the disease at the same time, such as cold fever, head and body pain, abdominal pain l…	FALSE	YES	YES	YES	YES	YES
122	multiple-choice question	Diagnostics of TCM	The following is a multiple-choice question from the Chinese Comprehensive Ability of Clinical Medicine (TCM) Examination. For each sub-question, there are four options labeled A, B, C, and D, among which at least two meet the requirements of the question. Please choose the correct answers and generate a correct and reasonable answer analysis Patients with high fever and thirst, more than the nex…	A	AC	The correct answer is: A. heat syndrome turning cold. The patient was originally heat syndrome, saw high heat tiredness and thirst, under the more than good, tongue red fur yellow pulse number. The sudden appearance of cold sweating, cold limbs, thin pulse and other cold symptoms belong to heat syndrome damaging Yang qi, resulting in Yang deficiency and transforming into cold syndrome, that is, "…	FALSE	YES	YES	YES		YES
123	multiple-choice question	Diagnostics of TCM	The following is a multiple-choice question from the Chinese Comprehensive Ability of Clinical Medicine (TCM) Examination. For each sub-question, there are four options labeled A, B, C, and D, among which at least two meet the requirements of the question. Please choose the correct answers and generate a correct and reasonable answer analysis The following options belong to the manifestation of l…	BC	ABCD	"The correct answer is: B. tinnitus and forgetfulness C. insomnia and dreams. Yin deficiency of the liver and kidney refers to the pathological changes of Yin fluid deficiency and internal disturbance of the liver and kidney, which can be clinically manifested as dizziness, tinnitus and fornication (B right), insomnia and dreaminess (C right), dry throat and mouth, five upset heat, dull pain of t…	FALSE	YES	YES	YES	YES	YES
124	multiple-choice question	Diagnostics of TCM	The following is a multiple-choice question from the Chinese Comprehensive Ability of Clinical Medicine (TCM) Examination. For each sub-question, there are four options labeled A, B, C, and D, among which at least two meet the requirements of the question. Please choose the correct answers and generate a correct and reasonable answer analysis Stomach Yin deficiency syndrome and stomach fire incan…	C	AB	"The correct answer is: C. Eliminate hunger. The common characteristics of stomach Yin deficiency syndrome and stomach fire burning syndrome are the elimination of grain and good hunger (C right), and the stomach duct pain (A wrong) is the manifestation of stomach fire burning burning syndrome. Constipation yellow urine (B wrong) is the inevitable manifestation of stomach fire burning syndrome, g…	FALSE	NO	NO	NO		YES
125	multiple-choice question	Diagnostics of TCM	The following is a multiple-choice question from the Chinese Comprehensive Ability of Clinical Medicine (TCM) Examination. For each sub-question, there are four options labeled A, B, C, and D, among which at least two meet the requirements of the question. Please choose the correct answers and generate a correct and reasonable answer analysis Among the following options, can be seen in the spleen…	D	ABCD	"The correct answer is: D. Heavy menstruation. Spleen does not regulate blood, refers to spleen deficiency can not control blood, blood does not follow the menstrual flow and overflow, clinical blood stool, urine blood, muscle bleeding (A), tooth bleeding, excessive menstruation (D), discontinuous leakage, etc. Yellowish complexion (mistake B), lack of food and fatigue (mistake C) are signs of de…	FALSE	YES	YES	YES	YES	YES
126	multiple-choice question	Pharmacology of TCM	The following is a multiple-choice question from the Chinese Comprehensive Ability of Clinical Medicine (TCM) Examination. For each sub-question, there are four options labeled A, B, C, and D, among which at least two meet the requirements of the question. Please choose the correct answers and generate a correct and reasonable answer analysis The following drugs that should not be used with licor…	B	ABD	"The correct answer is B. Lilac Daphne. The combination of liquorice and lilac daphne produced toxic reactions, that is, glycyrrhiza anti-lilac daphne in "18 anti", so it could not be used together (B right). However, when used with Beijing Euphorbia (A wrong), laminae (C wrong), and seaweed (D wrong), there is no such reaction, because they belong to the content of the "nineteen fears", not the …	FALSE	YES	YES	YES		YES
127	multiple-choice question	Pharmacology of TCM	The following is a multiple-choice question from the Chinese Comprehensive Ability of Clinical Medicine (TCM) Examination. For each sub-question, there are four options labeled A, B, C, and D, among which at least two meet the requirements of the question. Please choose the correct answers and generate a correct and reasonable answer analysis Treatment of lung carbuncle, commonly used drugs are (…	ABCD	ACD	"The correct answer is: A. Luigen B. Big blood vine C. Houttuynia D. Coix seed. Reed root, big blood vine, Houttuynia, coix seed can treat lung carbuncle (ABCD right).	FALSE	NO	NO	NO		YES
128	multiple-choice question	Pharmacology of TCM	The following is a multiple-choice question from the Chinese Comprehensive Ability of Clinical Medicine (TCM) Examination. For each sub-question, there are four options labeled A, B, C, and D, among which at least two meet the requirements of the question. Please choose the correct answers and generate a correct and reasonable answer analysis Drugs that both reduce water and strengthen the spleen…	C	BCD	"The correct answer is C. Tuckahoe. Poria sweet light, spleen infiltration dampness, spleen deficiency wet stop, especially suitable. Water without hurting the temper, for water infiltration wet medicine. (C) Yes. Acanthopanax peel (A wrong) has the effect of dispelling wind and dampness, tonifying liver and kidney, and strengthening muscles and bones. Astragalus (B wrong) is sweet and has the ef…	FALSE	YES	YES	YES	YES	YES
129	multiple-choice question	Pharmacology of TCM	The following is a multiple-choice question from the Chinese Comprehensive Ability of Clinical Medicine (TCM) Examination. For each sub-question, there are four options labeled A, B, C, and D, among which at least two meet the requirements of the question. Please choose the correct answers and generate a correct and reasonable answer analysis The indications of Thunberg Fritillary are () A. Wind-…	C	AC	"The correct answer is: C. cough with phlegm heat. Thunberg Fritillium bitter drainage, clearing heat and eliminating phlegm, reducing lung qi, treating phlegm-heat cough (C right). Wind-heat cough should choose mulberry leaves, chrysanthemum, burdock seeds, forsythia and other xin cool dissolving drugs to dissipate wind heat and promote lung. Phlegm-dampness cough should be dried orange peel, pi…	FALSE	YES	YES	YES		YES
130	multiple-choice question	Pharmacology of TCM	The following is a multiple-choice question from the Chinese Comprehensive Ability of Clinical Medicine (TCM) Examination. For each sub-question, there are four options labeled A, B, C, and D, among which at least two meet the requirements of the question. Please choose the correct answers and generate a correct and reasonable answer analysis The efficacy of Eucommia is () A. dispelling wind-damp…	BCD	BCD	"The correct answer is: BCD. Eucommia tonifying liver and kidney, strengthening muscles and bones, placenta. Wind-dampness is not the effect of Duzhong. (BCD right)."	TRUE	YES	NO	NO
131	multiple-choice question	Pharmacology of TCM	The following is a multiple-choice question from the Chinese Comprehensive Ability of Clinical Medicine (TCM) Examination. For each sub-question, there are four options labeled A, B, C, and D, among which at least two meet the requirements of the question. Please choose the correct answers and generate a correct and reasonable answer analysis Of the following drugs, pregnant women should be cauti…	D	ABCD	"The correct answer is D. trifoliate. Pregnant women should be careful to use the drugs are: precipitating qi of trifoliate, mirabilite, rhubarb, etc., promoting blood circulation and removing blood stasis of peach kernel, safflower, madder, Wang not to go, Chuanxiong, motherwort, etc., bitter cold diarrhea of coptis, scutellaria, Phellodendron, gentian, green leaves, isatis root, etc., as well a…	FALSE	YES	YES	YES		YES
132	multiple-choice question	Pharmacology of TCM	The following is a multiple-choice question from the Chinese Comprehensive Ability of Clinical Medicine (TCM) Examination. For each sub-question, there are four options labeled A, B, C, and D, among which at least two meet the requirements of the question. Please choose the correct answers and generate a correct and reasonable answer analysis The following treatment of rheumatic fever, commonly u…	ABC	ABC	"The correct answer is: ABC. Rheumatic heat arthralgia, in order to feel the rheumatic heat caused by pathogenic factors, with muscle and joint pain as the main symptoms, often choose to remove wind and remove dampness, clearing heat and clearing collaterals of drugs, such as Gentiana (A), tetrandrine (B), collaterals (C) and so on. Although Kunming Mountain malus (D wrong) can remove wind and re…	TRUE	YES	YES	YES
133	multiple-choice question	Pharmacology of TCM	The following is a multiple-choice question from the Chinese Comprehensive Ability of Clinical Medicine (TCM) Examination. For each sub-question, there are four options labeled A, B, C, and D, among which at least two meet the requirements of the question. Please choose the correct answers and generate a correct and reasonable answer analysis Panax notoginseng and Pu Huang are mainly used in () A…	D	ACD	"The correct answer is: D. stasis and bleeding. Notoginseng has the effect of removing blood stasis, promoting blood circulation and fixing pain, good hemostasis, and can remove blood stasis and produce new blood. It has the characteristics of stopping blood without leaving blood stasis and removing blood stasis without hurting blood, and can be used to treat various bleeding, injuries from falls…	FALSE	YES	YES	NO	YES	YES
134	multiple-choice question	Pharmacology of TCM	The following is a multiple-choice question from the Chinese Comprehensive Ability of Clinical Medicine (TCM) Examination. For each sub-question, there are four options labeled A, B, C, and D, among which at least two meet the requirements of the question. Please choose the correct answers and generate a correct and reasonable answer analysis Oyster Treatment () A. spermatosynopsis B. palpitation…	ABCD	ABCD	Oyster has the effect of calming liver and suppressing Yang, astringent, soft and firm, dispersing knot, and producing acid after calcined to relieve pain. It can be used for hyperactivity of liver-yang, head vertigo, palpitation, insomnia, uneasiness, spontaneous sweating, night sweats, spermatospermia, frequent urination, enuresis, dissolving of the lower band, stomach pain pantothenic acid, st…	TRUE	YES	YES	YES
135	multiple-choice question	Pharmacology of TCM	The following is a multiple-choice question from the Chinese Comprehensive Ability of Clinical Medicine (TCM) Examination. For each sub-question, there are four options labeled A, B, C, and D, among which at least two meet the requirements of the question. Please choose the correct answers and generate a correct and reasonable answer analysis Indications of calamine () A. wet sores itching B. unr…	ABC	ABC	"The correct answer is: B. unfilled ulcers C. red eyes. Calamine has the effect of detoxifying the eyes and removing the pannus, collecting dampness and relieving itching, and can be used to treat the red pannus of the eyes (C right), wet sore itching (A right), ulcer not gathering (B right), and sore not healing for a long time. However, calamine has no effect on sore throat, so D is excluded.	TRUE	YES	YES	NO
136	multiple-choice question	Formulas of TCM	The following is a multiple-choice question from the Chinese Comprehensive Ability of Clinical Medicine (TCM) Examination. For each sub-question, there are four options labeled A, B, C, and D, among which at least two meet the requirements of the question. Please choose the correct answers and generate a correct and reasonable answer analysis Belonging to the "Israeli legal Authority" are () A. T…	B	ABCD	"The correct answer is: B. Legal method. "To rule the formula" means to control the prescription by the law, that is, according to the comprehensive performance of the disease, after legislation, and then select the prescription to send medicine, so that the formula and the law are unified, such as the treatment of wind cold and cold with Xinwarm solution method, the choice of ephedra decoction. …	FALSE	YES	YES	NO		YES
137	multiple-choice question	Formulas of TCM	The following is a multiple-choice question from the Chinese Comprehensive Ability of Clinical Medicine (TCM) Examination. For each sub-question, there are four options labeled A, B, C, and D, among which at least two meet the requirements of the question. Please choose the correct answers and generate a correct and reasonable answer analysis The formulae classified according to their function or…	B	BD	"The correct answer is: B. Eight. There are mainly the following kinds of classification methods of formulae: classification according to the number of components (one thing, one thing, two things, one thing); Classification according to function (Jiedu prescription, qi prescription, blood prescription, tonifying prescription, Qufeng prescription, qudampness prescription, astringent prescription,…	FALSE	YES	YES	YES		YES
138	multiple-choice question	Formulas of TCM	The following is a multiple-choice question from the Chinese Comprehensive Ability of Clinical Medicine (TCM) Examination. For each sub-question, there are four options labeled A, B, C, and D, among which at least two meet the requirements of the question. Please choose the correct answers and generate a correct and reasonable answer analysis The Intention of Combining Cohosh with Stomach Clearin…	D	ABD	The correct answer is: D. to relieve the fire without chilling it. Qingwei powder is mainly used to treat tooth pain caused by accumulated heat in the stomach and upper attack of fire gas. Cohosh cold, sweet taste, rising Yang detoxification, cohosh with Coptis a cold and heat, opposite each other, with heat clearing fire, detoxification and pain relief, so that the fire without cooling, rising Y…	FALSE	YES	YES	NO	YES	YES
139	multiple-choice question	Formulas of TCM	The following is a multiple-choice question from the Chinese Comprehensive Ability of Clinical Medicine (TCM) Examination. For each sub-question, there are four options labeled A, B, C, and D, among which at least two meet the requirements of the question. Please choose the correct answers and generate a correct and reasonable answer analysis The following are Chuanxiong Chadiao based on () A. Th…	ABD	ABD	"The correct answer is ABD. The formulation basis of Chuanxiong Chatiao powder includes: on the top of the peak, only wind medicine can reach (B right), Waifeng Yizan (A right), combination of sparse and nourishing (C wrong), and thinning of wind to prevent excessive warming and dryness from rising (D right). Among them, on the top of the peak, only wind medicine can be reached refers to the basi…	TRUE	YES	YES	YES
140	multiple-choice question	Formulas of TCM	The following is a multiple-choice question from the Chinese Comprehensive Ability of Clinical Medicine (TCM) Examination. For each sub-question, there are four options labeled A, B, C, and D, among which at least two meet the requirements of the question. Please choose the correct answers and generate a correct and reasonable answer analysis The combination of pinellia sinensis and Ophiopogon, w…	A	AD	"The correct answer is: A. wheat Asparagine Decoction . Radix ophiopogon decoction reuses Radix ophiopogon as king, nourishes lung and stomach, nourishes Yin and moistens dryness; Ginseng tonifying lung qi; Pinellia depressurises qi, reduces phlegm and stops vomiting; Rice, jujube and licorice cultivate soil and produce gold. Ophiopogon and pinellia are used together, with the meaning of "elimina…	FALSE	YES	YES	YES		YES
141	multiple-choice question	Formulas of TCM	The following is a multiple-choice question from the Chinese Comprehensive Ability of Clinical Medicine (TCM) Examination. For each sub-question, there are four options labeled A, B, C, and D, among which at least two meet the requirements of the question. Please choose the correct answers and generate a correct and reasonable answer analysis Gastrodia Guteng drink and Dendrobium night light Wan …	AC	AC	"The correct answer is AC. Tianma Guteng drink and Dendrobium night light Wan both have the functions of calming liver and calming wind (C right) and nourishing liver and kidney (A right). Clearing heat and promoting blood circulation (B wrong) is the function of Dendrobium night light Wan, and the function of Tianma Guteng drink is mainly to calm liver and wind, clearing heat and promoting blood…	TRUE	YES	YES	NO
142	multiple-choice question	Formulas of TCM	The following is a multiple-choice question from the Chinese Comprehensive Ability of Clinical Medicine (TCM) Examination. For each sub-question, there are four options labeled A, B, C, and D, among which at least two meet the requirements of the question. Please choose the correct answers and generate a correct and reasonable answer analysis The following formulae for the treatment of spontaneou…	BC	ABC	"The correct answer is BC. Guizhi Decoction (A wrong) has the effect of harmonizing Yingwei, dissolving muscle and dispelling evil spirits, which is mainly used to treat solar stroke syndrome. Yupingfeng powder (B) has beneficial qi, solid surface, antiperspirant effect, mainly used to treat Qi deficiency and unsolid, sweat leakage. Oyster powder (C right) has the effect of restraining Yin and pr…	FALSE	YES	YES	YES		YES
143	multiple-choice question	Formulas of TCM	The following is a multiple-choice question from the Chinese Comprehensive Ability of Clinical Medicine (TCM) Examination. For each sub-question, there are four options labeled A, B, C, and D, among which at least two meet the requirements of the question. Please choose the correct answers and generate a correct and reasonable answer analysis The following formulae for supplementing lung qi, nour…	A	AB	"The correct answer is A. Jiuxian SAN, composed of ginseng, cohosh, poppy husk, schisandra, ejiao, mulberry bark, fritillium, platycodon platycodon and Wumei, has the effect of tonifying lung qi, nourishing lung Yin, and suppressing lung cough. It is often used to treat chronic cough, shortness of breath, low cough sound, blood in sputum, spirit fatigue, red tongue and less moss caused by prolong…	FALSE	YES	YES	YES		YES
144	multiple-choice question	Formulas of TCM	The following is a multiple-choice question from the Chinese Comprehensive Ability of Clinical Medicine (TCM) Examination. For each sub-question, there are four options labeled A, B, C, and D, among which at least two meet the requirements of the question. Please choose the correct answers and generate a correct and reasonable answer analysis The following derivatives of Guizhi Decoction are () A…	AB	ABC	"The correct answer is AB. The main derivatives of Guizhi decoction include: Guizhi plus Houpu Xingzi decoction, Guizhi plus Fuzi decoction, Guizhi plus Huang decoction, Guizhi plus keel and Oyster Decoction , Xiaojianzhong decoction and Huangqi Jianzhong decoction. Danggui Sini Decoction and Huangqi Guizhi Wuwu Decoction are all made from Guizhi Decoction, so they also belong to the derivative o…	FALSE	YES	YES	YES	YES
145	multiple-choice question	Formulas of TCM	The following is a multiple-choice question from the Chinese Comprehensive Ability of Clinical Medicine (TCM) Examination. For each sub-question, there are four options labeled A, B, C, and D, among which at least two meet the requirements of the question. Please choose the correct answers and generate a correct and reasonable answer analysis The following statements about Buyang Huanwu decoction…	ABD	ABCD	"The correct answer is ABD. Buyang Huanwu Decoction is A traditional Chinese medicine prescription used to treat the sequelae of stroke, especially those caused by Qi deficiency and blood stasis (A right). The main components of this recipe are Astragalus and a variety of Chinese medicines for promoting blood circulation and collaterals, among which Astragalus has the effects of invigorating qi, …	FALSE	YES	YES	YES		YES
146	multiple-choice question	Internal Medicine of TCM	The following is a multiple-choice question from the Chinese Comprehensive Ability of Clinical Medicine (TCM) Examination. For each sub-question, there are four options labeled A, B, C, and D, among which at least two meet the requirements of the question. Please choose the correct answers and generate a correct and reasonable answer analysis Treatments that can be used for jue confirmation inclu…	AD	ABCD	"The correct answer is AD. The syndrome of Jue can be treated by opening the body to awaken the spirit (A right), promoting blood circulation to remove blood stasis (D right), restoring Yang to save inverse, Tongfu-draining heat, and supplementing Qi to cure the deficiency of Jue syndrome (C wrong) and resolving phlegm to eliminate foul water (B wrong).	FALSE	YES	YES	YES		YES
147	multiple-choice question	Internal Medicine of TCM	The following is a multiple-choice question from the Chinese Comprehensive Ability of Clinical Medicine (TCM) Examination. For each sub-question, there are four options labeled A, B, C, and D, among which at least two meet the requirements of the question. Please choose the correct answers and generate a correct and reasonable answer analysis The following blood syndrome can be treated by Guipi d…	ABD	ABD	"The correct answer is ABD. Guipi decoction can be used to treat the deficiency of spleen qi, the right to control, the blood of various blood syndrome, such as vomiting blood, epistaxis, blood in the stool, urine blood, etc., belongs to the qi does not take blood syndrome (B). Among them, epistaxis belongs to Qi and blood deficiency syndrome (A), and urine blood belongs to spleen not regulating …	TRUE	YES	YES	NO
148	multiple-choice question	Internal Medicine of TCM	The following is a multiple-choice question from the Chinese Comprehensive Ability of Clinical Medicine (TCM) Examination. For each sub-question, there are four options labeled A, B, C, and D, among which at least two meet the requirements of the question. Please choose the correct answers and generate a correct and reasonable answer analysis Among the following pathologic factors associated with…	ACD	ACD	"The correct answer is ACD. The pathologic factors related to BI syndrome include wind, cold, dampness, heat, phlegm, and stasis (ACD).	TRUE	YES	YES	NO
149	multiple-choice question	Internal Medicine of TCM	The following is a multiple-choice question from the Chinese Comprehensive Ability of Clinical Medicine (TCM) Examination. For each sub-question, there are four options labeled A, B, C, and D, among which at least two meet the requirements of the question. Please choose the correct answers and generate a correct and reasonable answer analysis The clinical features of diarrhea and dysentery are ()…	B	ABC	"The correct answer is: B. Both diarrhea and dysentery can be seen in increased frequency of stool, often with the clinical manifestations of posterior tenesiosis (D right), but diarrhea without posterior tenesiosis. More frequent in summer and autumn season (A right), feeling exogenous evil or internal injury diet disease (B right), lesions involving the large intestine (C right) are manifestati…	FALSE	YES	YES	YES	YES	YES
150	multiple-choice question	Internal Medicine of TCM	The following is a multiple-choice question from the Chinese Comprehensive Ability of Clinical Medicine (TCM) Examination. For each sub-question, there are four options labeled A, B, C, and D, among which at least two meet the requirements of the question. Please choose the correct answers and generate a correct and reasonable answer analysis The distinguishing points of wind-cold cold and wind-h…	C	BC	"The correct answer is C. The distinguishing points of wind-cold cold and wind-heat cold are whether the runny nose (C right), wind-cold cold is clear nose, wind-heat cold is turny nose; Whether there is A headache (A wrong), whether there is a sore throat (B wrong), whether there is a cough (D wrong) is not the difference between wind-cold cold and wind-heat cold."	FALSE	YES	YES	NO		YES
151	multiple-choice question	Internal Medicine of TCM	The following is a multiple-choice question from the Chinese Comprehensive Ability of Clinical Medicine (TCM) Examination. For each sub-question, there are four options labeled A, B, C, and D, among which at least two meet the requirements of the question. Please choose the correct answers and generate a correct and reasonable answer analysis The main points of syndrome differentiation of stomach…	B	ABC	"The correct answer is: B. Move or immobilize the area of pain. Qi is blood handsome, blood is Qi mother, Qi is blood, Qi stagnation is blood stasis. If you are worried and angry, qi depression and blood is not smooth; Or improper diet, injury to the spleen and stomach, natured transport disorder, qi machinery is not smooth, will cause qi machinery stagnation and not xuantong, and then affect the…	FALSE	YES	YES	YES		YES
152	multiple-choice question	Internal Medicine of TCM	The following is a multiple-choice question from the Chinese Comprehensive Ability of Clinical Medicine (TCM) Examination. For each sub-question, there are four options labeled A, B, C, and D, among which at least two meet the requirements of the question. Please choose the correct answers and generate a correct and reasonable answer analysis Suitable for the treatment of blood syndrome different…	A	AB	"The correct answer is A. artichoke plus or minus. It is advisable to use the methods of clearing heat and cooling blood, removing dampness and removing stone, and supplementing deficiency and bleeding. The commonly used formula is the addition and subtraction of Xiaothistle Yinzi (A right). Zhibai Dihuang Wan plus or minus (B wrong) is used to treat the deficiency fire vigorous blood. Shiwei pow…	FALSE	YES	YES	YES	YES	YES
153	multiple-choice question	Internal Medicine of TCM	The following is a multiple-choice question from the Chinese Comprehensive Ability of Clinical Medicine (TCM) Examination. For each sub-question, there are four options labeled A, B, C, and D, among which at least two meet the requirements of the question. Please choose the correct answers and generate a correct and reasonable answer analysis Female, 46 years old, there are clumps on both sides o…	AB	AC	"The correct answer is AB. The patient had lumps on both sides of the Adam's apple for 3 years, palpitations, restlessness, dry and sweaty eyes, finger tremor, red tongue and little liver-pulse string, which were in line with the symptoms of Tianwang Buxin Dan and Gardenia Qinggan Decoction, so these two formulas could be used for addition and subtraction treatment (A, B right). Consistent decoct…	FALSE	YES	YES	YES		YES
154	multiple-choice question	Internal Medicine of TCM	The following is a multiple-choice question from the Chinese Comprehensive Ability of Clinical Medicine (TCM) Examination. For each sub-question, there are four options labeled A, B, C, and D, among which at least two meet the requirements of the question. Please choose the correct answers and generate a correct and reasonable answer analysis Belongs to internal injury fever treatment is () A. Su…	AB	ABC	"The correct answer is AB. The treatment methods of internal injury fever include nourishing Yin and clearing heat (B), supplementing qi and nourishing blood (A), dispelling stagnation and qi, and promoting blood circulation and removing blood stasis. Transiting ying to turn qi (D wrong) is a treatment for blood accumulation and fever.	FALSE	YES	YES	YES	YES
155	multiple-choice question	Internal Medicine of TCM	The following is a multiple-choice question from the Chinese Comprehensive Ability of Clinical Medicine (TCM) Examination. For each sub-question, there are four options labeled A, B, C, and D, among which at least two meet the requirements of the question. Please choose the correct answers and generate a correct and reasonable answer analysis The diseases of phlegm-drinking syndrome that can be t…	AD	AD	"The correct answer is AD. Xiaoqinglong decoction can be used in the treatment of the syndrome of heavy drinking (A right) and the syndrome of excessive drinking (D right). Xiaoqinglong Decoction mainly has the effect of dispelling superficial cold and warming lung to liquefy. It has certain therapeutic effect on sWanage, draught and overhang caused by external wind cold and internal water suspen…	TRUE	YES	YES	NO
156	multiple-choice question	Internal Medicine of TCM	The following is a multiple-choice question from the Chinese Comprehensive Ability of Clinical Medicine (TCM) Examination. For each sub-question, there are four options labeled A, B, C, and D, among which at least two meet the requirements of the question. Please choose the correct answers and generate a correct and reasonable answer analysis The causes of exhaustion are () A. Lack of endowments,…	ABCD	ABCD	"The correct answer is ABCD. There are many causes of deficiency, including lack of endowment, physical weakness (A), overwork, damage to the five viscera (B), loss of treatment, loss of qi (C), and chronic illness, loss of conditioning (D). These reasons lead to the loss of qi, blood and Yin and Yang in the human body, resulting in a series of deficiency symptoms."	TRUE	YES	YES	NO
157	multiple-choice question	Internal Medicine of TCM	The following is a multiple-choice question from the Chinese Comprehensive Ability of Clinical Medicine (TCM) Examination. For each sub-question, there are four options labeled A, B, C, and D, among which at least two meet the requirements of the question. Please choose the correct answers and generate a correct and reasonable answer analysis Common treatments for real secrets include () A. Drain…	ABD	AB	"The correct answer is ABD. The common treatment methods of the real secret are draining heat and guiding stagnation, moistening bowel and defecating (A right); Regulating qi to guide stagnation, reducing reverse defecation (B right); Moistening dryness and eliminating phlegm, lowering qi and defecating (D right). And promoting blood circulation and removing blood stasis, qi and defecation (C wro…	FALSE	YES	YES	YES		YES
158	multiple-choice question	Acupuncture and Moxibustion	The following is a multiple-choice question from the Chinese Comprehensive Ability of Clinical Medicine (TCM) Examination. For each sub-question, there are four options labeled A, B, C, and D, among which at least two meet the requirements of the question. Please choose the correct answers and generate a correct and reasonable answer analysis According to the rules of the fourteen channels and po…	D	BD	"The correct answer is D. The Ren meridian, The Du meridian. According to the law of the fourteen meridian acupoints, Ren pulse acupoints can treat mental illness, and Du pulse acupoints can also treat mental illness, so the answer is The Ren meridian and The Du meridian (D right). Three hand-yang meridians (A wrong), Three foot-yang meridians (B wrong) and Three foot-yin meridians (C wrong) have…	FALSE	YES	YES	NO		YES
159	multiple-choice question	Acupuncture and Moxibustion	The following is a multiple-choice question from the Chinese Comprehensive Ability of Clinical Medicine (TCM) Examination. For each sub-question, there are four options labeled A, B, C, and D, among which at least two meet the requirements of the question. Please choose the correct answers and generate a correct and reasonable answer analysis Among the following five acupoints, the five elements …	D	AD	"The correct answer is D. fluid gate. SJ2 (D right) is the Xingpoint of Shaoyang Sanjiao Channel, and the five elements belong to water. GB43 (A wrong) is the Xingyang point of the foot Shaoyang gallbladder Meridian, and the five elements belong to fire. HT9 (B wrong) is the Xingyang point of Shaoyin heart classics, and the five elements belong to fire. SP1(C wrong) is the well point of the splee…	FALSE	YES	YES	YES		YES
160	multiple-choice question	Acupuncture and Moxibustion	The following is a multiple-choice question from the Chinese Comprehensive Ability of Clinical Medicine (TCM) Examination. For each sub-question, there are four options labeled A, B, C, and D, among which at least two meet the requirements of the question. Please choose the correct answers and generate a correct and reasonable answer analysis Among the following groups of acupoints, none of which…	A	BC	The correct answer is A. BL15, less Shang. LU11 Point is located in the radial side of the finger end, 0.1 inch above the fingernail root corner. It is the well point of the lung meridian. The Wuxing is wood, which can treat external symptoms such as fever, sore throat, cough, and can also be used for the treatment of hysteria, insomnia and other emotional diseases. Generally do not use the way o…	FALSE	YES	YES	YES	YES	YES
161	multiple-choice question	Acupuncture and Moxibustion	The following is a multiple-choice question from the Chinese Comprehensive Ability of Clinical Medicine (TCM) Examination. For each sub-question, there are four options labeled A, B, C, and D, among which at least two meet the requirements of the question. Please choose the correct answers and generate a correct and reasonable answer analysis The following descriptions of the distance between the…	A	ABC	The correct answer is: A. The maximum distance between the chizawa and the hole is 5 inches. According to the eight points of the eight pulse meeting formula: "Abdominal, Sanli, Juxu intestine, Dicang, Xia Juxu, Zhaohai, BL62, Yin Jiao, milk root, Zhangmen is", it can be seen that the distance of abdominal, Sanli, Juxu intestine is 3 inches, the distance of Dicang, Xiajuxu is 4 inches, the distan…	FALSE	YES	YES	YES		YES
162	multiple-choice question	Acupuncture and Moxibustion	The following is a multiple-choice question from the Chinese Comprehensive Ability of Clinical Medicine (TCM) Examination. For each sub-question, there are four options labeled A, B, C, and D, among which at least two meet the requirements of the question. Please choose the correct answers and generate a correct and reasonable answer analysis Among the following options, Measures to prevent stick…	ABCD	AB	"The correct answer is ABCD. The measures to prevent needle stagnation are as follows: explain the patient before acupuncture, avoid tension, choose the right position (A right), relax the muscle, easy to enter the needle, needle is appropriate; Avoid unidirectional twist (B right) when lining the needle; The point selection should be few and the technique should be light (C right); Avoid pressin…	FALSE	YES	YES	NO		YES
163	multiple-choice question	Acupuncture and Moxibustion	The following is a multiple-choice question from the Chinese Comprehensive Ability of Clinical Medicine (TCM) Examination. For each sub-question, there are four options labeled A, B, C, and D, among which at least two meet the requirements of the question. Please choose the correct answers and generate a correct and reasonable answer analysis Both the eight pulse intersection point and the collat…	BC	BCD	"The correct answer is BC. Eight meridians confluent points are the eight points connecting twelve meridians and eight odd meridians, which can treat the meridians and the odd meridians connected with them. Luoxue point is interlinked with external and internal meridians, treating diseases of external and internal meridians. SP4 is the spleen meridian of the collateral-point, but also the eight p…	FALSE	YES	YES	YES		YES
164	multiple-choice question	Acupuncture and Moxibustion	The following is a multiple-choice question from the Chinese Comprehensive Ability of Clinical Medicine (TCM) Examination. For each sub-question, there are four options labeled A, B, C, and D, among which at least two meet the requirements of the question. Please choose the correct answers and generate a correct and reasonable answer analysis The following acupuncture points belong to the bladder…	D	ABD	"The correct answer is D. BL62, BL54. BL62 and BL54 belong to The bladder meridian of foot-Taiyang (D right). BL15 belongs to the foot Taiyang bladder meridian, BL1 belongs to the foot Taiyang bladder meridian, but the two do not belong to A component (A wrong). BL67 is the well point ofThe bladder meridian of foot-Taiyang, and the BL32 is the acupoint on the Du pulse, and the two do not belong t…	FALSE	YES	YES	YES	YES	YES
165	multiple-choice question	Acupuncture and Moxibustion	The following is a multiple-choice question from the Chinese Comprehensive Ability of Clinical Medicine (TCM) Examination. For each sub-question, there are four options labeled A, B, C, and D, among which at least two meet the requirements of the question. Please choose the correct answers and generate a correct and reasonable answer analysis The following statement about the location of acupoint…	B	ABC	"The correct answer is: B. PC6 is 5 inches above the distal transverse stripe of the volar wrist, between the tendon of the long palm and the flexor tendon of the wrist of the radial side. PC6 (B right) is 5 inches on the distal transverse stripe of the volar wrist, between the tendon of the long palm and the flexor tendon of the wrist of the radialis. SI8 (A wrong) in the olecranon fossa of the …	FALSE	YES	YES	NO	YES	YES

## Sheet: ChatGLM
Number	Type	Subject	Question	The chosen answer from response	Correct answer	LLM's response	Evaluation metrics				Reasons for incorrect response
							Accuracy(TRUE/FALSE)	Logical reasoning(YES/NO)	Ability to use internal information(YES/NO)	Ability to use external information(YES/NO)	Logical error	Information error
1	single-choice question	Basic Theory of TCM	The following is a single-choice question from the Chinese Comprehensive Ability of Clinical Medicine (TCM) Examination. Please choose the correct answer and provide a correct and reasonable answer analysis. The theoretical basis of "seek yang within yin" is ( ) A. Yang gets Yin and is not overly rebellious B. Yin is helped by Yang but not stagnant C. Yang is helped by Yin and biochemical is infi…	C	C	The correct answer is: C. Yang is assisted by Yin and has infinite biochemistry Answer analysis: seek yang within yin refers to emphasizing the coordination and promotion of Yin and Yang on the basis of Yin Yang balance, so as to achieve balance by constraining each other. The theoretical basis for the theory of Yang receiving Yin assistance and infinite biochemistry refers to the continuous prom…	TRUE	YES	YES	NO
2	single-choice question	Basic Theory of TCM	The following is a single-choice question from the Chinese Comprehensive Ability of Clinical Medicine (TCM) Examination. Please choose the correct answer and provide a correct and reasonable answer analysis. According to mutual generation and control among the five elements, the principle of restraining the strong and supporting the weak is demonstrated by ( ) A.Warming the kidney and tonifying t…	C	D	Answer: C Analysis: This question tests the understanding of the Five Elements and the application of the principle of restraining the strong and supporting the weak in the comprehensive ability of clinical medicine (Traditional Chinese Medicine). The law of the five elements restraining each other refers to the relationship between the five elements that mutually nourish and constrain each other…	FALSE	YES	YES	NO		YES
3	single-choice question	Basic Theory of TCM	The following is a single-choice question from the Chinese Comprehensive Ability of Clinical Medicine (TCM) Examination. Please choose the correct answer and provide a correct and reasonable answer analysis. What is the expression of a man's "fifty eight" in "The Innocence of Ancient Times" A has strong muscles and bones B. has fallen teeth and withers C. has exhausted the body D. has a burnt face	A	B	Firstly, we need to understand that "five or eight" in the question stem refers to a man's performance at the age of five or eight. According to the discussion in "The Simple Question of Ancient Innocence", at the age of five or eight, a man's muscles and bones will flourish. Next, we will analyze the correctness of each option: A. Prosperous muscles and bones: in line with the performance of men…	FALSE	YES	YES	YES		YES
4	single-choice question	Basic Theory of TCM	The following is a single-choice question from the Chinese Comprehensive Ability of Clinical Medicine (TCM) Examination. Please choose the correct answer and provide a correct and reasonable answer analysis. According to the Suwen, the Sanjiao is called () A The receiving and holding organ B. The conveyance organ C. The dredging and draining organ D. The reservoir organ	C	C	According to the Suwen, the Sanjiao is known as the dredging and draining organ. Answer analysis: Suwen discusses the functions and interrelationships of the five organs and six internal organs of the human body. In this article, Sanjiao is given the title of the official responsible for resolving blasphemy. Jue Du refers to the smoothness and regulation of waterways, and the Sanjiao is mainly re…	TRUE	YES	YES	NO
5	single-choice question	Basic Theory of TCM	The following is a single-choice question from the Chinese Comprehensive Ability of Clinical Medicine (TCM) Examination. Please choose the correct answer and provide a correct and reasonable answer analysis. The theoretical basis for the saying "Do not sweat in a family with bleeding" is () A Qi can generate fluid B. Fluid can carry gas C. Homogeny of essence and blood D. Homogeny of fluid and bl…	D	D	The theoretical basis for the saying "one cannot sweat at home" is that D. Homogeny of fluid and blood. Answer analysis: Xuejia refers to patients who suffer from loss of essence and blood, as well as yin deficiency with effulgent fire. In traditional Chinese medicine theory, both body fluid and blood are derived from the essence of water and grains, and the two are transformed into each other, h…	TRUE	YES	YES	YES
6	single-choice question	Basic Theory of TCM	The following is a single-choice question from the Chinese Comprehensive Ability of Clinical Medicine (TCM) Examination. Please choose the correct answer and provide a correct and reasonable answer analysis. The smallest collateral is () A Tertiary collateral vessel B. Bie collateral vessel C. Superficial collateral vessel D. Blood collateral vessel	A	A	The smallest collateral is the A. Tertiary collateral vessel. Answer analysis: In traditional Chinese medicine, collaterals are small branches in the venous system. The tertiary collateral vessel is the smallest collateral, distributed throughout the body and difficult to count. The function of the tertiary collateral vessel is to communicate with the collaterals and strengthen the circulation of…	TRUE	YES	YES	YES
7	single-choice question	Basic Theory of TCM	The following is a single-choice question from the Chinese Comprehensive Ability of Clinical Medicine (TCM) Examination. Please choose the correct answer and provide a correct and reasonable answer analysis. What is the pathogenesis of external heat pathogen, characterized by thirst, liking to drink, shortness of breath, and fatigue A. Summer heat damages the heart and qi B. Summer heat Damage to…	D	D	The pathogenesis of external Summer heat pathogenic factors, characterized by thirst, liking to drink, and shortness of breath and weakness, is D. Summer heat ascends and disperses, which damages the body and consumes qi. Answer analysis: Summer heat evil is a yang evil, with a hot nature that can easily harm the body and consume qi. Summer heat evil often manifests as symptoms such as thirst, li…	TRUE	YES	YES	NO
8	single-choice question	Basic Theory of TCM	The following is a single-choice question from the Chinese Comprehensive Ability of Clinical Medicine (TCM) Examination. Please choose the correct answer and provide a correct and reasonable answer analysis. "Excess manifesting with extreme deficiency" refers to () A. Excessive evil energy leads to the decline of positive energy, manifested as external "deficiency" B. Weak positive energy leads t…	C	C	"Excess manifesting with extreme deficiency" refers to the weakness and inability of the internal organs to move and transform, manifested as external "excess". Answer analysis: "To the point of deficiency, there is a syndrome of excess" is a traditional Chinese medicine term that refers to the deficiency and decline of qi in the organs, which is unable to move and transform, leading to excessive…	TRUE	YES	YES	NO
9	single-choice question	Basic Theory of TCM	The following is a single-choice question from the Chinese Comprehensive Ability of Clinical Medicine (TCM) Examination. Please choose the correct answer and provide a correct and reasonable answer analysis. For those with bleeding from metrorrhagia and a dark purple color mixed with blood clots, the appropriate treatment is () A. Convergence and hemostasis B. Boost qi to contain blood C. Warming…	D	D	If there is blood leakage and a dark purple color with blood clots, the treatment should be D. to remove blood stasis and stop bleeding. Answer analysis: According to the theory of traditional Chinese medicine, the presence of blood clots in the color of purple and dark due to metrorrhagia is caused by internal obstruction of blood stasis and poor blood circulation. The treatment of this disease …	TRUE	YES	YES	NO
10	single-choice question	Diagnostics of TCM	The following is a single-choice question from the Chinese Comprehensive Ability of Clinical Medicine (TCM) Examination. Please choose the correct answer and provide a correct and reasonable answer analysis. What is not a common indication of bluish and black facial complexion? A. Blood stasis pattern, Pain B. Blood stasis pattern, Infantile convulsions C. Cold pattern, Pain D. Cold pattern, Bloo…	B	B	What does not belong to the common main syndrome of blue and black complexion is B. blood stasis and convulsive wind. Answer analysis: The common main symptoms of blue and black complexion are cold syndrome, blood stasis, and pain. Cold syndrome may cause a bluish black complexion, possibly due to the obstruction of collaterals by yin cold evil energy, which hinders the smooth flow of qi and bloo…	TRUE	YES	YES	YES
11	single-choice question	Diagnostics of TCM	The following is a single-choice question from the Chinese Comprehensive Ability of Clinical Medicine (TCM) Examination. Please choose the correct answer and provide a correct and reasonable answer analysis. Which of the following symptoms can be seen as tenesmus A. Dampness-heat in the spleen B. Cold-dampness encumbering the spleen C. Intestinal heat and bowel excess D. Large intestinal dampness…	C	D	Among the following syndromes, it can be seen that the manifestation of urgency and heaviness is C. Intestinal heat and bowel excess. Answer analysis: Tenesmus is a symptom in traditional Chinese medicine, mainly manifested as abdominal distension and pain, constipation, and urinary urgency followed by heaviness. Intestinal heat and visceral excess syndrome is one of the causes of this symptom, m…	FALSE	YES	YES	NO		YES
12	single-choice question	Diagnostics of TCM	The following is a single-choice question from the Chinese Comprehensive Ability of Clinical Medicine (TCM) Examination. Please choose the correct answer and provide a correct and reasonable answer analysis. Which of the following options does not belong to the main disease of dry fur A. Excessive heat and evil B. Deficiency of yin fluid C. Internal accumulation of dampness and evil D. Qi not tra…	C	C	Among the following options, the one that does not belong to the main disease of dry fur is C. dampness evil accumulation. Answer analysis: Dry tongue coating is a common manifestation of tongue coating in traditional Chinese medicine, mainly related to factors such as excessive heat, deficiency of yin fluid, and inability to transform qi into fluid. Excessive heat and evil can cause dryness of t…	TRUE	YES	YES	YES
13	single-choice question	Diagnostics of TCM	The following is a single-choice question from the Chinese Comprehensive Ability of Clinical Medicine (TCM) Examination. Please choose the correct answer and provide a correct and reasonable answer analysis. Which of the following options belongs to the same manifestation of heat and heat syndrome A. Aversion to cold with fever, sore throat B. Fever and sweating, thirst and yellow urine C. Fever …	B	B	Among the following options, the manifestation that belongs to the same pattern as the pathogenic summer heat pattern and pathogenic fire pattern is B. Fever, sweating, thirst, and yellow urine. Answer analysis: Both pathogenic summer heat pattern and pathogenic fire pattern are one of the six syndromes in traditional Chinese medicine, and they both have symptoms of fever. The main symptoms of pa…	TRUE	YES	YES	YES
14	single-choice question	Diagnostics of TCM	The following is a single-choice question from the Chinese Comprehensive Ability of Clinical Medicine (TCM) Examination. Please choose the correct answer and provide a correct and reasonable answer analysis. Which of the following options does not belong to the clinical manifestations of Water-ffuid retention pattern A. Spit water B. Chest tightness and palpitations D. Excessive vaginal discharge	D	D	Among the following options, the one that does not belong to the clinical manifestation of water-ffuid retention pattern is D. excessive vaginal discharge. Answer analysis: Water-ffuid retention pattern is one of the six yin syndromes in traditional Chinese medicine, mainly manifested as the stagnation of water and liquid in a certain part of the body, leading to poor qi circulation in that part …	TRUE	YES	YES	YES
15	single-choice question	Diagnostics of TCM	The following is a single-choice question from the Chinese Comprehensive Ability of Clinical Medicine (TCM) Examination. Please choose the correct answer and provide a correct and reasonable answer analysis. Which of the following options does not belong to the clinical manifestations of blood heat pattern A. Spotted purple black color B. Repeated bleeding with blood clots C. Fresh red and sticky…	A	B	Among the following options, the one that does not belong to the clinical manifestation of blood heat pattern is A. The rash color is purple black. Answer analysis: Blood heat pattern is one of the common diseases in traditional Chinese medicine, mainly manifested as excessive heat and fire in the body, characterized by symptoms such as bleeding and rash. The clinical manifestations of blood heat…	FALSE	YES	YES	YES		YES
16	single-choice question	Diagnostics of TCM	The following is a single-choice question from the Chinese Comprehensive Ability of Clinical Medicine (TCM) Examination. Please choose the correct answer and provide a correct and reasonable answer analysis. Symptoms include palpitations and restlessness, insomnia and frequent dreaming, hot flashes and night sweats, redness in the cheekbones, redness in the tongue and lack of fluids, and thin pul…	A	A	Symptoms include palpitations and restlessness, insomnia and frequent dreaming, hot flashes and night sweats, redness in the cheekbones, redness in the tongue and lack of fluids, and thin pulse count. Certificate A. Heart Yin Deficiency. Answer analysis: This question mainly tests the differentiation of traditional Chinese medicine syndromes. Based on the symptoms described in the question stem, …	TRUE	YES	YES	YES
17	single-choice question	Diagnostics of TCM	The following is a single-choice question from the Chinese Comprehensive Ability of Clinical Medicine (TCM) Examination. Please choose the correct answer and provide a correct and reasonable answer analysis. According to the "Shang Han Lun" Treatise on Cold Damage, those who suffer from both Taiyang pattern and Shaoyang pattern simultaneously belong to () A. Combined disorder B. Concurrent collat…	B	B	According to the "Shang Han Lun", those who suffer from both Taiyang disease and Shaoyang disease simultaneously belong to the category of B. Concurrent collateral pattern. Answer analysis: This question mainly tests the differentiation of diseases and syndromes in the classic Chinese medicine book "Shang Han Lun". In the "Shang Han Lun", concurrent collateral pattern refers to a syndrome in whic…	TRUE	YES	YES	YES
18	single-choice question	Diagnostics of TCM	The following is a single-choice question from the Chinese Comprehensive Ability of Clinical Medicine (TCM) Examination. Please choose the correct answer and provide a correct and reasonable answer analysis. Which of the following options is visible in the Damp heat in the liver and gallbladder pattern but not in the Damp heat accumulating in the spleen pattern A. Yellow body and eyes B. Yellow a…	C	D	Among the following options, the manifestation that can be seen in Damp heat in the liver and gallbladder pattern but not in Damp heat accumulating in the spleen pattern is C. Bitter mouth and sticky mouth. Answer analysis: This question mainly tests the differentiation and analysis of traditional Chinese medicine diseases and syndromes. The Damp heat in the liver and gallbladder pattern and the …	FALSE	YES	YES	YES		YES
19	single-choice question	Pharmacology of TCM	The following is a single-choice question from the Chinese Comprehensive Ability of Clinical Medicine (TCM) Examination. Please choose the correct answer and provide a correct and reasonable answer analysis. According to the theory of medicinal properties, most of the drugs used to treat edema and inhibited urination have the flavor of ( ) A. Astringent flavor B. Bland flavor C. Salty flavor D. B…	C	B	According to the theory of medicinal properties, most drugs that treat oedema and inhibited urination have a flavour of C. salty. Answer analysis: This question mainly tests the theory of traditional Chinese medicine properties. According to the theory of medicinal properties, the five flavors of a drug (sour, bitter, sweet, spicy, and salty) are closely related to its efficacy. Salty drugs have …	FALSE	YES	YES	NO		YES
20	single-choice question	Pharmacology of TCM	The following is a single-choice question from the Chinese Comprehensive Ability of Clinical Medicine (TCM) Examination. Please choose the correct answer and provide a correct and reasonable answer analysis. Which of the following options is the most suitable medication for treating solid heat stagnation and dry stool A. Cassiae Semen B. Sennae Folium C. Polygoni Cuspidati Rhizoma Et Radix D. Nat…	D	D	Among the following options, D. Natrii Sulfas is particularly suitable for treating patients with solid heat accumulation and dry stool. Answer analysis: This question mainly tests the theory of traditional Chinese medicine properties. According to the theory of medicinal properties, the five flavors of a drug (sour, bitter, sweet, spicy, and salty) are closely related to its efficacy. Natrii Sul…	TRUE	YES	YES	YES
21	single-choice question	Pharmacology of TCM	The following is a single-choice question from the Chinese Comprehensive Ability of Clinical Medicine (TCM) Examination. Please choose the correct answer and provide a correct and reasonable answer analysis. What are the common effects of Aconiti Lateralis Radix Praeparata and Cinnamomi Cortex A. Restore yang to save from collapse,warm the middle to check vomiting B. Inducing fire to return to th…	C	C	The common effect of aconite and Cinnamomi Cortex is C. Tonify fire and assist yang, dissipate cold and alleviate pain. Answer analysis: Both Aconite and Cinnamomum are warm and hot traditional Chinese medicines, with characteristics of spiciness, sweetness, and heat, which belong to the heart, spleen, liver, and kidney collaterals. The common effect of both is toTonify fire and assist yang, diss…	TRUE	YES	YES	YES
22	single-choice question	Pharmacology of TCM	The following is a single-choice question from the Chinese Comprehensive Ability of Clinical Medicine (TCM) Examination. Please choose the correct answer and provide a correct and reasonable answer analysis. Which of the following Parasite-expelling medicines has a bitter, spicy, and warm nature, and belongs to the stomach and large intestine A. Nan Gua Zi B. He Cao Ya C. Arecae Semen D. Torreyae…	C	C	Among the following insect repellents, C. Arecae Semen has a bitter, spicy, and warm flavour, and belongs to the stomach and large intestine. Answer analysis: Arecae Semen is a commonly used insect repellent, with a bitter, pungent, and warm flavour that belongs to the stomach and large intestine. It has the effects of killing insects, reducing accumulation, promoting qi circulation, promoting di…	TRUE	YES	YES	YES
23	single-choice question	Pharmacology of TCM	The following is a single-choice question from the Chinese Comprehensive Ability of Clinical Medicine (TCM) Examination. Please choose the correct answer and provide a correct and reasonable answer analysis. What is the daily dosage of Cinnabarisis commonly taken as a powder A. 0.015-0.03g B.0.1-0.5g C.1-2g D.3-5g	A	B	The following is a multiple-choice question about the daily dosage of Cinnabaris, and the correct answer is A.0.015-0.03g. Answer analysis: Vermilion sand is a commonly used traditional Chinese medicine with functions such as clear heat and remove toxins, clearing the heart and calming the mind. It is mainly used to treat diseases such as insomnia and restlessness. Vermilion sand is generally not…	FALSE	YES	YES	YES	YES
24	single-choice question	Pharmacology of TCM	The following is a single-choice question from the Chinese Comprehensive Ability of Clinical Medicine (TCM) Examination. Please choose the correct answer and provide a correct and reasonable answer analysis. What is the best medicine for astringe the intestine and stop diarrhoea that should be simmered, for regulating the lungs, clearing heat, promoting swallowing and opening sounds, and for prom…	A	A	The following is a multiple-choice question about astringe the intestine and stop diarrhoea, lung regulating and heat clearing, and diuretic and vocal opening drugs. The correct answer is A. Chenulae Fructus. Answer analysis: Chenulae Fructus is a type of astringent medicine that has the effects of astringe the intestine and stop diarrhoea, regulating lungs, clearing heat, and promoting swallowin…	TRUE	YES	YES	NO
25	single-choice question	Pharmacology of TCM	The following is a single-choice question from the Chinese Comprehensive Ability of Clinical Medicine (TCM) Examination. Please choose the correct answer and provide a correct and reasonable answer analysis. What is the effect of Cimicifugae Rhizomae A. Promote skin eruption B. Ascending yang to stop diarrhea C. Soothe the liver and regulate qi D. Promote fluid production to quench thirst	A	A	The following is a multiple-choice question about the efficacy of cohosh, and the correct answer is A. translucency. Answer analysis: Cimicifugae Rhizoma is a commonly used traditional Chinese medicine, which has the effects of penetrating rash, clearing heat and detoxifying, and lifting yang and sinking. In this question, the main function of cohosh is to penetrate the rash, so option A is corre…	TRUE	YES	YES	NO
26	single-choice question	Pharmacology of TCM	The following is a single-choice question from the Chinese Comprehensive Ability of Clinical Medicine (TCM) Examination. Please choose the correct answer and provide a correct and reasonable answer analysis. What is the medication that has the effects of warming the lungs, clearing phlegm, promoting qi, dispersing nodules, unblocking collaterals, and relieving pain A.Cynanchi Stauntonii Rhizoma E…	C	C	The following is a multiple-choice question about drugs that have the effects of warming the lungs, clearing phlegm, promoting qi, dispersing knots, unblocking collaterals, and relieving pain. The correct answer is C. White Mustard Seed Answer analysis: White Mustard Seed is a warm and spicy medicine that belongs to the lung and stomach meridians. Its main efficacy is to warm the lungs, dispel ph…	TRUE	YES	YES	YES
27	single-choice question	Pharmacology of TCM	The following is a single-choice question from the Chinese Comprehensive Ability of Clinical Medicine (TCM) Examination. Please choose the correct answer and provide a correct and reasonable answer analysis. Medications that can not only soothe the liver, promote qi circulation, relieve depression, but also stimulate the stomach, digest food, and strengthen the spleen A. Rose B. Bergamot C. Malt …	B	C	The following is a multiple-choice question about drugs that can not only soothe the liver, promote qi circulation, relieve depression, but also stimulate digestion and invigorate the spleen. The correct answer is B. Buddha's hand. Answer analysis: Buddha's hand is a spicy, sour, and warm traditional Chinese medicine that belongs to the liver, spleen, and stomach meridians. Its main efficacy is t…	FALSE	YES	YES	YES		YES
28	single-choice question	Formulas of TCM	The following is a single-choice question from the Chinese Comprehensive Ability of Clinical Medicine (TCM) Examination. Please choose the correct answer and provide a correct and reasonable answer analysis. What are the drugs in both Qianghuo Shengshi Decoction and Daqin Jiao Decoction A. Atractylodis Rhizoma and Angelicae Pubescentis Radix B. Chuanxiong Rhizoma and Saposhnikoviae Radix C.Ligust…	C	B	The following is a multiple-choice question about the drugs in both Qianghuo Shengshi Decoction and Daqin Jiao Decoction. The correct answer is C. Ligustici Rhizoma Et Radix and Angelicae Dahuricae Radix Answer analysis: Qianghuo Shengshi Decoction and Daqin Jiao Decoction are both traditional Chinese medicine formulas, both of which have certain effects on dispelling dampness and promoting dampn…	FALSE	YES	YES	YES		YES
29	single-choice question	Formulas of TCM	The following is a single-choice question from the Chinese Comprehensive Ability of Clinical Medicine (TCM) Examination. Please choose the correct answer and provide a correct and reasonable answer analysis. What is the medication that is contained in the Bixie Fenqing drink in "Yang Shi Jia Cang Fang", but not in the Bixie Fenqing drink in "Yi Xue Xin Xu" A. Linderae Radix, Yizhiren B. Atractylo…	C	A	The following is a multiple-choice question about the differences in drug composition between Bixie Fenqing drink in "Yang Shi Jia Cang Fang" and Bixie Fenqing drink in "Yi Xue Xin Xu". The correct answer is C. Poria cocos, Plantago seed Answer analysis: "Yang's Family Collection Formula" and "Yi Xue Xin Xu" are both traditional Chinese medicine formulas, but their drug compositions are different…	FALSE	YES	YES	YES		YES
30	single-choice question	Formulas of TCM	The following is a single-choice question from the Chinese Comprehensive Ability of Clinical Medicine (TCM) Examination. Please choose the correct answer and provide a correct and reasonable answer analysis. What is the efficacy of Wu Zhu Yu Decoction A. Warm in the middle to dispel cold, slow and urgent to relieve pain B. Warm in the middle to supplement deficiency, lower adverse reactions and s…	B	B	The efficacy of Wu Zhu Yu Decoction is B. warming the middle and tonifying deficiency, lowering stress and stopping vomiting. Answer analysis:Wu Zhu Yu Decoction is a traditional Chinese medicine formula, mainly composed of Euodiae Fructus, Zingiberis Rhizoma Recens, Ginseng Radix Et Rhizoma, and Jujubae Fructus. It has the function of warming the middle and tonifying deficiency, and is suitable …	TRUE	YES	YES	YES
31	single-choice question	Formulas of TCM	The following is a single-choice question from the Chinese Comprehensive Ability of Clinical Medicine (TCM) Examination. Please choose the correct answer and provide a correct and reasonable answer analysis What are the benefits of both Zi Jin Ding and Xian Fang Huo Ming Yin A. Clearing heat and detoxifying B. Reducing swelling and pain C. Removing decay and promoting muscle growth D. Softening a…	AB	B	Both Zi Jin Ding and Xian Fang Huo Ming Yin have the effects of A. clearing heat and detoxifying, and B. reducing swelling and pain. Answer analysis: Zi Jin Ding and Xian Fang Huo Ming Yin are commonly used formulas in traditional Chinese medicine, which have the effects of clearing heat, detoxifying, and reducing swelling and pain. Zi Jin Ding is mainly used to treat diseases such as sores, carb…	FALSE	YES	YES	YES		YES
32	single-choice question	Formulas of TCM	The following is a single-choice question from the Chinese Comprehensive Ability of Clinical Medicine (TCM) Examination. Please choose the correct answer and provide a correct and reasonable answer analysis What is the prescription theory that emphasizes the dual nourishment of Qi and blood, with a focus on supplementing Qi and promoting the self generation of Qi and blood to nourish blood and ca…	A	A	The formula that emphasizes the dual nourishment of qi and blood, with a focus on nourishing qi and promoting blood circulation to nourish blood and calm the mind is A. Gui Pi Decoction. Answer analysis: Gui Pi Decoction is a traditional Chinese medicine formula mainly used to treat symptoms caused by weak spleen and deficiency of qi and blood, such as palpitations, insomnia, loss of appetite, et…	TRUE	YES	YES	YES
33	single-choice question	Formulas of TCM	The following is a single-choice question from the Chinese Comprehensive Ability of Clinical Medicine (TCM) Examination. Please choose the correct answer and provide a correct and reasonable answer analysis. What is the formula for clearing up heat and purging heat A. Da Cheng Qi Decoction B.Huang Lian Jie Du Decoction C. Liang Ge San D.Ge Gen Qin Lian Decoction	C	C	The prescription for clearing up heat and purging heat is C. Liang Ge San , which is used in parallel with the purpose of purging heat. Answer analysis: Liang Ge San is a traditional Chinese medicine formula mainly used to treat symptoms caused by upper jiao stagnation heat, such as headache, redness of the eyes, and sore throat. The medicinal herbs in Liang Ge San have the effect of clearing and…	TRUE	YES	YES	YES
34	single-choice question	Formulas of TCM	The following is a single-choice question from the Chinese Comprehensive Ability of Clinical Medicine (TCM) Examination. Please choose the correct answer and provide a correct and reasonable answer analysis Indicating frequent urination, it can also be used to treat enuresis. The formula for enuresis is () A. Jin Suo Gu Jing Wan B. Sang Piao Xiao San C. Shen Qi Wan D. You Gui Wan	B	B	Indicating frequent urination, it can also be used to treat enuresis. The formula for nocturnal emission is B. Sang Piao Xiao San. Answer analysis: Sang Piao Xiao San is a traditional Chinese medicine formula, with the main effects of tonifying the kidney and consolidating essence, reducing urine and stopping bleeding. It is mainly used to treat symptoms such as frequent urination, enuresis, and …	TRUE	YES	YES	YES
35	single-choice question	Formulas of TCM	The following is a single-choice question from the Chinese Comprehensive Ability of Clinical Medicine (TCM) Examination. Please choose the correct answer and provide a correct and reasonable answer analysis What is the formula for treating women who suffer from various symptomatic diseases and have persistent leakage? It can also be used to treat amenorrhea or postpartum lochia and abdominal pain…	D	D	D. Gui Zhi Fu Ling Wan is a prescription that can be used to treat women with symptoms and persistent leakage, as well as to treat amenorrhea or postpartum lochia and abdominal pain. Answer analysis: Gui Zhi Fu Ling Wan is a traditional Chinese medicine formula, with the main effects of promoting blood circulation and removing blood stasis, soothing and soothing the liver. It is mainly used to tr…	TRUE	YES	YES	YES
36	single-choice question	Formulas of TCM	The following is a single-choice question from the Chinese Comprehensive Ability of Clinical Medicine (TCM) Examination. Please choose the correct answer and provide a correct and reasonable answer analysis The application of Si Ni Decoction is recommended for patients with symptoms such as limb syncope, chills, and curling up. The pulse may be weak and the pulse may recur from below, but the rem…	B	B	When using Si Ni Decoction, if symptoms include limb syncope, cold aversion, and curling up, with a slight and complex pulse that starts from the bottom, and although the effect stops, the remaining symptoms are still present, it is advisable to add B. ginseng. Answer analysis: Si Ni Decoction is mainly used to treat Yang deficiency and cold coagulation syndrome, with symptoms including limb sync…	TRUE	YES	YES	NO
37	single-choice question	Internal Medicine of TCM	The following is a single-choice question from the Chinese Comprehensive Ability of Clinical Medicine (TCM) Examination. Please choose the correct answer and provide a correct and reasonable answer analysis Female, 49 years old. Insomnia for 4 months, restlessness and difficulty falling asleep, palpitations and frequent dreams accompanied by dizziness and tinnitus, soreness and weakness in the wa…	C	C	Female, 49 years old. Insomnia for 4 months, restlessness, difficulty falling asleep, palpitations and frequent dreams accompanied by dizziness and tinnitus, soreness and weakness in the waist and knees, hot flashes and night sweats, restlessness and heat in the five hearts, dry throat and lack of saliva, red tongue coating, and thin pulse. It is recommended to choose C. Liu Wei Di Huang Wan and …	TRUE	YES	YES	YES
38	single-choice question	Internal Medicine of TCM	The following is a single-choice question from the Chinese Comprehensive Ability of Clinical Medicine (TCM) Examination. Please choose the correct answer and provide a correct and reasonable answer analysis Female, 34 years old, coughing for 3 months, chest X-ray shows increased texture in both lower lungs. Coughing and thrusting, chest and flank swelling and pain, dry throat and bitter mouth, le…	C	C	Female, 34 years old, coughing for 3 months, chest X-ray shows increased texture in both lower lungs. Coughing and thrusting, chest and rib swelling and pain, dry throat and bitter mouth, less phlegm and sticky texture, red tongue with thin yellow coating, and stringy pulse. The syndrome belongs to C. Liver ffre affecting the lung pattern. Answer analysis: Based on the patient's symptoms and ches…	TRUE	YES	YES	YES
39	single-choice question	Internal Medicine of TCM	The following is a single-choice question from the Chinese Comprehensive Ability of Clinical Medicine (TCM) Examination. Please choose the correct answer and provide a correct and reasonable answer analysis. Female, 28 years old, experienced external symptoms a week ago, with aversion to cold and fever, and head and body pain. Symptoms include: cough, yellow phlegm, wheezing in the throat, shortn…	B	B	Female, 28 years old, experienced external symptoms a week ago, with aversion to cold and fever, and head and body pain. Symptoms include: cough with yellow phlegm, wheezing in the throat, wheezing and shortness of breath, dry mouth and thirst, red and greasy tongue coating, and smooth pulse. It is recommended to choose B. Ding Chuan Decoction. Answer analysis: Based on the patient's symptoms, it…	TRUE	YES	YES	YES
40	single-choice question	Internal Medicine of TCM	Male, 55 years old. I usually have a headache, dizziness, and sudden left hemiplegia. My tongue is strong and silent, and my consciousness is not clear. I have a lot of phlegm and constipation, and my tongue is dark red. The coating is yellow and greasy, and my pulse is smooth. The diagnosis is () A. Wind Yang Upward Disturbance Syndrome of Stroke B. Phlegm Heat and Fu Syndrome of Stroke C. Phleg…	B	B	Male, 55 years old. I usually have a headache, dizziness, and sudden left hemiplegia. My tongue is strong and silent, and my consciousness is not clear. I have a lot of phlegm and constipation, and my tongue is dark red. The coating is yellow and greasy, and my pulse is smooth. The diagnosis is B. Stroke with phlegm heat and fu syndrome. Answer analysis: Based on the patient's symptoms, it can be…	TRUE	YES	YES	YES
41	single-choice question	Internal Medicine of TCM	The following is a single-choice question from the Chinese Comprehensive Ability of Clinical Medicine (TCM) Examination. Please choose the correct answer and provide a correct and reasonable answer analysis Female, 75 years old. Long term illness, incurable for a long time, with symptoms such as dizziness and tinnitus, dry eyes and photophobia, numbness in limbs, impatience and irritability, red …	B	C	Female, 75 years old. Long term illness, incurable for a long time, with symptoms such as dizziness and tinnitus, dry eyes and photophobia, numbness in limbs, impatience and irritability, red tongue with little coating, and thin pulse. B. Sha Shen Mai Dong Decoction is suitable for treatment. Answer analysis: Based on the patient's symptoms, it can be determined as liver and kidney yin deficiency…	FALSE	YES	YES	YES		YES
42	single-choice question	Internal Medicine of TCM	The following is a single-choice question from the Chinese Comprehensive Ability of Clinical Medicine (TCM) Examination. Please choose the correct answer and provide a correct and reasonable answer analysis Male, 67 years old. A history of chronic bronchitis for 19 years. Symptoms include shallow breathing, opening mouth and lifting shoulders, inability to lie flat, chest tightness and palpitatio…	B	B	Male, 67 years old. A history of chronic bronchitis for 19 years. Symptoms include shallow breathing, opening mouth and lifting shoulders, inability to lie flat, chest tightness and palpitations, cold and sweaty appearance, weak waist and knees, short and weak urination, pale purple tongue, and deep and thin pulse. Its diagnosis is B. Lung distension, with deficiency of lung and kidney qi. Answer…	TRUE	YES	YES	YES
43	single-choice question	Internal Medicine of TCM	The following is a single-choice question from the Chinese Comprehensive Ability of Clinical Medicine (TCM) Examination. Please choose the correct answer and provide a correct and reasonable answer analysis Male, 74 years old. A history of benign prostatic hyperplasia for 10 years. For the past month, I have had difficulty urinating, dribbling down, feeling tired and fatigued, feeling chilly and …	C	D	Male, 74 years old. A history of benign prostatic hyperplasia for 10 years. For the past month, I have had difficulty urinating, dribbling and feeling tired and weak. I am afraid of cold and my limbs are cold, and my waist and knees are cold and painful. My tongue is light and fat, and my coating is thin and white. My pulse is deep and thin. The appropriate treatment method is to use C. tonifying…	FALSE	YES	YES	NO		YES
44	single-choice question	Internal Medicine of TCM	The following is a single-choice question from the Chinese Comprehensive Ability of Clinical Medicine (TCM) Examination. Please choose the correct answer and provide a correct and reasonable answer analysis Female, 63 years old. Yesterday, I suddenly had a cold and fever, headache, strong and urgent neck and back, severe limb soreness, convulsions, thin and white coating, and tight pulse. Its dia…	B	D	Female, 63 years old. Yesterday, I suddenly had a cold and fever, headache, strong and urgent neck and back, severe limb soreness, convulsions, thin and white coating, and tight pulse. Its diagnosis is B. Cold, wind cold bundle syndrome. Answer analysis: Based on the patient's symptoms, symptoms such as aversion to cold, fever, headache, strong and urgent neck and back, limb soreness, and limb co…	FALSE	YES	YES	YES		YES
45	single-choice question	Internal Medicine of TCM	The following is a single-choice question from the Chinese Comprehensive Ability of Clinical Medicine (TCM) Examination. Please choose the correct answer and provide a correct and reasonable answer analysis The main principles for treating Phlegm-ffuid retention are () A. Attack and chase B. Infiltrate and benefit C. Warm and transform D. Spread and disperse	B	C	治疗痰阻的主要原则是渗痰利尿。 答解析：痰饮是中医的一种证候，主要表现为痰湿郁结于体内。治痰阻的关键在于利湿化痰，使痰湿之邪从体内消除。渗利尿是一种治疗原则，包括选择具有祛湿、利尿、化痰功效的药物，如茯苓、泽泻、瓜子等，以达到化痰的目的。攻、温、散的其他选择并不是治疗痰阴的主要原则。因此，正确答案是B.渗透。	FALSE	YES	YES	YES		YES
46	single-choice question	Internal Medicine of TCM	The following is a single-choice question from the Chinese Comprehensive Ability of Clinical Medicine (TCM) Examination. Please choose the correct answer and provide a correct and reasonable answer analysis Male, 32 years old, enjoys spicy food. Yesterday, after a gathering, he vomited blood and red, mixed with food residue. He had bloating and stuffiness in the epigastric cavity, bad breath and …	A	B	According to the description of the condition, the patient presents with symptoms such as vomiting blood, bloating and stuffiness in the epigastric region, bad breath and constipation, and dark stools. The diagnosis is vomiting blood due to stomach heat stagnation. It is advisable to choose a formula with the effects of clearing the stomach, purging fire, cooling blood, and stopping bleeding for …	FALSE	YES	YES	YES		YES
47	single-choice question	Internal Medicine of TCM	The following is a single-choice question from the Chinese Comprehensive Ability of Clinical Medicine (TCM) Examination. Please choose the correct answer and provide a correct and reasonable answer analysis Female, 86 years old, with 26 years history of hypertension and 21 years history of diabetes, taking losartan potassium, acarbose and aspirin for a long time. Symptoms include chest tightness …	C	D	According to the condition description, the patient is a 86 year old female with 26 years history of hypertension and 21 years history of diabetes. She has taken losartan potassium, acarbose and aspirin for a long time. Current symptoms include chest tightness and shortness of breath, palpitations and pain, increased movement, fatigue and self sweating. The tongue is light and plump, and the puls…	FALSE	YES	YES	YES		YES
48	single-choice question	Internal Medicine of TCM	The following is a single-choice question from the Chinese Comprehensive Ability of Clinical Medicine (TCM) Examination. Please choose the correct answer and provide a correct and reasonable answer analysis Female, 28 years old. After 4 months of delivery, there is heaviness in the limbs, muscle and joint soreness, poor mobility, inability to descend to the ground, worsening after activity, pale …	D	D	According to the description of the condition, the patient is a 28 year old female who developed heavy limbs, muscle and joint pain, poor mobility, inability to descend, and worsened after 4 months of delivery. The tongue is pale with white and greasy coating, and the pulse is moist. Diagnosed as postpartum rheumatism. A. Fang Feng Decoction: Suitable for external wind evil, which invades muscles…	TRUE	YES	YES	YES
49	single-choice question	Internal Medicine of TCM	The following is a single-choice question from the Chinese Comprehensive Ability of Clinical Medicine (TCM) Examination. Please choose the correct answer and provide a correct and reasonable answer analysis Female, 30 years old. For the past three months, there have been loose and lax stools, which persist and recur. After eating, there is stuffiness and discomfort. If there is a slight intake of…	C	C	According to the description of the condition, the patient is a 30 year old female who has had loose and intermittent bowel movements over the past 3 months, with persistent and recurrent symptoms. After eating, the patient may feel stuffy and uncomfortable, and may experience an increase in the frequency of bowel movements when consuming oily or greasy foods. Her complexion may turn pale, her mi…	TRUE	YES	YES	YES
50	single-choice question	Internal Medicine of TCM	The following is a single-choice question from the Chinese Comprehensive Ability of Clinical Medicine (TCM) Examination. Please choose the correct answer and provide a correct and reasonable answer analysis Female, 32 years old, usually experiences loss of appetite and discomfort in the stomach after eating. I have been experiencing nausea and vomiting for the past week, feeling tired and fatigue…	B	B	According to the description of the condition, the patient is a 32 year old female who usually experiences loss of appetite and discomfort in her stomach after eating. I have been experiencing nausea and vomiting for the past week, feeling tired and fatigued, feeling stuffy in the epigastric region, having difficulty with bowel movements, smooth and white tongue coating, and weak pulse. Diagnosed…	TRUE	YES	YES	YES
51	single-choice question	Internal Medicine of TCM	The following is a single-choice question from the Chinese Comprehensive Ability of Clinical Medicine (TCM) Examination. Please choose the correct answer and provide a correct and reasonable answer analysis.Female, 43 years old, edema for many years, sometimes mild and sometimes severe, aggravated before menstruation, edema continued for 3 months, swollen face, stinging in the waist, purple and d…	C	C	According to the description of the condition, the patient is a 43-year-old woman with edema for many years, sometimes mild and sometimes severe, the edema worsens before menstruation, and the edema persists for 3 months, the face is swollen, the waist is tingling, the tongue is purple and white, and the pulse is thin. The diagnosis was blood stasis obstruction, and edema did not go away. A. Jish…	TRUE	YES	YES	YES
52	single-choice question	Acupuncture and Moxibustion	The following is a single-choice question from the Chinese Comprehensive Ability of Clinical Medicine (TCM) Examination. Please choose the correct answer and provide a correct and reasonable answer analysis. Located 7 inches below the cubital crease is ( ) A.LU6 B.LI6 C.PC4 D.SJ6	C	C	According to the knowledge of TCM meridians, we know that the PC4 is located 7 inches below the horizontal stripe of the elbow, so the answer is C. PC4. Answer analysis: The PC4 is the acupuncture point of the Taiyin Lung Meridian of the hand, located 7 inches below the horizontal stripe of the elbow, when the outside of the biceps tendon. This acupuncture point has the effect of regulating lung …	TRUE	YES	YES	YES
53	single-choice question	Acupuncture and Moxibustion	The following is a single-choice question from the Chinese Comprehensive Ability of Clinical Medicine (TCM) Examination. Please choose the correct answer and provide a correct and reasonable answer analysis. The main treatment of the branch ditch and the non-main treatment of the external guan are () A.Tinnitus B.Eyes are swollen and painful C.diarrhea D.constipation	D	D	The Zhigou acupoint is the acupuncture point of the Sanjiao meridian of the hand Shaoyang, and its main function is to dredge the Sanjiao and promote the ventilation machine. The SJ5 acupoint is the meridian acupoint of the hand Shaoyang Sanjiao meridian, and its main function is to dredge the Sanjiao and relieve the surface and dispel wind. Therefore, there are many similarities between the main…	TRUE	YES	YES	NO
54	single-choice question	Acupuncture and Moxibustion	The following is a single-choice question from the Chinese Comprehensive Ability of Clinical Medicine (TCM) Examination. Please choose the correct answer and provide a correct and reasonable answer analysis. Among the following acupoints, acupuncture is not suitable for moxibustion () A. Eyesight B. Qi Sea C. Dazhu D. Baihui	A	A	Answer: A.Qing Ming Answer analysis: Qing Ming acupoint is the acupuncture point of the hand sun bladder meridian, located in the depression of the inner canthus of the eye. There are abundant nerves and blood vessels in the vicinity of the Qing Ming acupoint, so you need to be very careful when acupuncture the Qing Ming acupoint to avoid damaging the surrounding tissue structures. Moxibustion is…	TRUE	YES	YES	YES
55	single-choice question	Acupuncture and Moxibustion	The following is a single-choice question from the Chinese Comprehensive Ability of Clinical Medicine (TCM) Examination. Please choose the correct answer and provide a correct and reasonable answer analysis. Among the following Shu Xue, all of them can be used to treat urticaria and eczema: A. ST35, KI3 B. GB34,LU5 C. LU5,SP10 D. LU4 ,SP10	C	C	Answer: C. LU5,SP10 Answer analysis: The LU5 acupoint is the acupuncture point of the large intestine meridian of the hand Yangming, located on the outside of the elbow joint, and the midpoint of the line between the end of the elbow stria and the lateral epicondyle of the humerus. LU5 acupoint has the functions of dispelling wind and clearing heat, diluting dampness and detoxifying, and is a com…	TRUE	YES	YES	YES
56	single-choice question	Internal Medicine of TCM	The following is a single-choice question from the Chinese Comprehensive Ability of Clinical Medicine (TCM) Examination. Please choose the correct answer and provide a correct and reasonable answer analysis. Male, 73 years old, with a history of hypertension for 10 years and coronary heart disease for 8 years. 3 weeks ago, I had palpitations due to fright, I didn't sleep a lot, I ate a lot, I did…	C	C	Answer: C.Anshen Dingzhi Wan Answer analysis: According to the patient's medical history and symptoms, it can be judged that he is a patient with hypertension and coronary heart disease. 3 weeks ago, due to fright, he developed symptoms such as palpitations, sleeplessness, dreams, lack of food and sluggishness, and his tongue was pale and white, and his pulse was thin. These findings suggest that…	TRUE	YES	YES	YES
57	single-choice question	Internal Medicine of TCM	The following is a single-choice question from the Chinese Comprehensive Ability of Clinical Medicine (TCM) Examination. Please choose the correct answer and provide a correct and reasonable answer analysis. Male, 73 years old, with a history of hypertension for 10 years and coronary heart disease for 8 years. 3 weeks ago, I had palpitations due to fright, I didn't sleep a lot, I ate a lot, I did…	D	D	Answer: D. Chest paralysis Heart and kidney yang deficiency syndrome Answer analysis: According to the patient's medical history and symptoms, it can be judged that he is a patient with hypertension and coronary heart disease. Recently, he has developed symptoms such as chest tightness and chest pain, self-sweating and shortness of breath, drowsiness and fatigue, pale complexion, and hypothermia …	TRUE	YES	YES	YES
58	single-choice question	Internal Medicine of TCM	The following is a single-choice question from the Chinese Comprehensive Ability of Clinical Medicine (TCM) Examination. Please choose the correct answer and provide a correct and reasonable answer analysis. Male, 73 years old, with a history of hypertension for 10 years and coronary heart disease for 8 years. 3 weeks ago, I had palpitations due to fright, I didn't sleep a lot, I ate a lot, I did…	B	D	Answer: B Shenfu Decision and Guizhi Gancao Longgu Muli Decoction Answer analysis: Based on the patient's medical history and symptoms, it can be determined that they are patients with hypertension and coronary heart disease. Recently, there have been symptoms such as chest tightness, chest pain, short self sweating and shortness of breath, fatigue, pale complexion, and lukewarm limbs. The tongue…	FALSE	YES	YES	YES		YES
59	single-choice question	Internal Medicine of TCM	The following is a single-choice question from the Chinese Comprehensive Ability of Clinical Medicine (TCM) Examination. Please choose the correct answer and provide a correct and reasonable answer analysis. Male, 22 years old. Fever for a week, the initial body temperature is about 38 °C, gradually rising to 39.8 °C, chills, strong fever does not go away, cough and shortness of breath, severe pa…	C	B	Answer: C. Carbuncle ulceration stage Answer analysis: According to the description of the patient's symptoms, it can be judged that he has pulmonary carbuncle. Carbuncle is a disease syndrome in traditional Chinese medicine, which is mainly manifested by fever, cough, phlegm, chest pain and other symptoms. According to the course of the disease, pulmonary carbuncle can be divided into the initia…	FALSE	YES	YES	YES		YES
60	single-choice question	Internal Medicine of TCM	The following is a single-choice question from the Chinese Comprehensive Ability of Clinical Medicine (TCM) Examination. Please choose the correct answer and provide a correct and reasonable answer analysis. Male, 22 years old. Fever for a week, the initial body temperature is about 38 °C, gradually rising to 39.8 °C, chills, strong fever does not go away, cough and shortness of breath, severe pa…	C	C	Answer: C. Clear the lungs and detoxify, dissolve blood stasis and eliminate carbuncles Answer analysis: According to the description of the patient's symptoms, it can be judged that he has pulmonary carbuncle. Carbuncle is a disease syndrome in traditional Chinese medicine, which is mainly manifested by fever, cough, phlegm, chest pain and other symptoms. In this question, the patient has been i…	TRUE	YES	YES	YES
61	single-choice question	Internal Medicine of TCM	The following is a single-choice question from the Chinese Comprehensive Ability of Clinical Medicine (TCM) Examination. Please choose the correct answer and provide a correct and reasonable answer analysis. Male, 22 years old. Fever for a week, the initial body temperature is about 38 °C, gradually rising to 39.8 °C, chills, strong fever does not go away, cough and shortness of breath, severe pa…	C	A	Answer: C.Shashen Maidong Decoction Answer analysis: According to the patient's symptom description, after treatment, the patient's body heat gradually subsided, coughing up pus and blood decreased, the amount of phlegm decreased, the amount of food intake increased, self-sweating, shortness of breath, thin and white tongue, and thin pulse. These findings indicate that the condition has improved,…	FALSE	YES	YES	YES		YES
62	single-choice question	Internal Medicine of TCM	The following is a single-choice question from the Chinese Comprehensive Ability of Clinical Medicine (TCM) Examination. Please choose the correct answer and provide a correct and reasonable answer analysis. Female, 42 years old. 5 days ago, he had pain in the right flank, traction on the shoulder and back, nausea and vomiting from time to time, and the pain was reduced after taking Chinese and W…	A	A	Answer: A. Hypochondria Answer analysis: According to the patient's symptom description, right hypochondrium pain is the main clinical manifestation, accompanied by traction of the shoulder and back, nausea and vomiting and other symptoms. Although the patient has symptoms such as body heat, chills, high fever, dry mouth, sluggishness, abdominal distension after eating, constipation, and short an…	TRUE	YES	YES	NO
63	single-choice question	Internal Medicine of TCM	The following is a single-choice question from the Chinese Comprehensive Ability of Clinical Medicine (TCM) Examination. Please choose the correct answer and provide a correct and reasonable answer analysis. Female, 42 years old. 5 days ago, he had pain in the right flank, traction on the shoulder and back, nausea and vomiting from time to time, and the pain was reduced after taking Chinese and W…	C	C	Answer: C. Hepatobiliary dampness and heat Answer analysis: According to the patient's symptom description, right hypochondrium pain is the main clinical manifestation, accompanied by traction of the shoulder and back, nausea and vomiting and other symptoms. In addition, the patient also had symptoms such as body heat, chills, high fever, dry mouth, sluggishness, abdominal distension after eating…	TRUE	YES	YES	NO
64	single-choice question	Internal Medicine of TCM	The following is a single-choice question from the Chinese Comprehensive Ability of Clinical Medicine (TCM) Examination. Please choose the correct answer and provide a correct and reasonable answer analysis. Female, 42 years old. 5 days ago, he had pain in the right flank, traction on the shoulder and back, nausea and vomiting from time to time, and the pain was reduced after taking Chinese and W…	B	B	Answer: B. Longdan Xiegan Decoction plus or minus Answer analysis: According to the patient's symptom description, right hypochondrium pain is the main clinical manifestation, accompanied by traction of the shoulder and back, nausea and vomiting and other symptoms. In addition, the patient also had symptoms such as body heat, chills, high fever, dry mouth, sluggishness, abdominal distension after…	TRUE	YES	YES	YES
65	single-choice question	Internal Medicine of TCM	The following is a single-choice question from the Chinese Comprehensive Ability of Clinical Medicine (TCM) Examination. Please choose the correct answer and provide a correct and reasonable answer analysis. Female, 30 years old. Recently overworked, jaundice appeared 1 week ago. Symptoms include: yellow staining of the body and eyes, bright yellow, poor appetite, fatigue, dry mouth and bitter mo…	A	A	Answer: A. Damp heat fumigation, trapping the spleen and stomach, stagnation of the liver and gallbladder, bile overflow Answer analysis: According to the patient's symptom description, jaundice, yellow staining of the body, bitter mouth, constipation, and short urine and yellow red symptoms suggest dampness and heat. At the same time, symptoms such as poor appetite, fatigue, abdominal distention…	TRUE	YES	YES	NO
66	single-choice question	Internal Medicine of TCM	The following is a single-choice question from the Chinese Comprehensive Ability of Clinical Medicine (TCM) Examination. Please choose the correct answer and provide a correct and reasonable answer analysis. Female, 30 years old. Recently overworked, jaundice appeared 1 week ago. Symptoms include: yellow staining of the body and eyes, bright yellow, poor appetite, fatigue, dry mouth and bitter mo…	D	D	Answer: D. Clear away heat and clear the intestines, promote dampness and reduce yellowing Answer analysis: According to the patient's symptom description, such as jaundice, yellow staining of the body and eyes, bitter mouth, constipation, short urine and yellow redness, etc., suggest dampness and heat. At the same time, symptoms such as poor appetite, fatigue, abdominal distention, and poor slee…	TRUE	YES	YES	NO
67	single-choice question	Internal Medicine of TCM	The following is a single-choice question from the Chinese Comprehensive Ability of Clinical Medicine (TCM) Examination. Please choose the correct answer and provide a correct and reasonable answer analysis. Female, 30 years old. Recently overworked, jaundice appeared 1 week ago. Symptoms include: yellow staining of the body and eyes, bright yellow, poor appetite, fatigue, dry mouth and bitter mo…	A	C	Answer: A.Yinchen Wuling San Answer analysis: According to the patient's symptoms, such as jaundice, yellow staining of the body and eyes, bitter mouth, constipation, short urine and yellow redness, etc., suggest dampness and heat connotation. At the same time, symptoms such as poor appetite, fatigue, abdominal distention, and poor sleep at night indicate that the intestines are not clear. Accord…	FALSE	YES	YES	NO		YES
68	single-choice question	Acupuncture and Moxibustion	The following is a single-choice question from the Chinese Comprehensive Ability of Clinical Medicine (TCM) Examination. Please choose the correct answer and provide a correct and reasonable answer analysis. Female, 40 years old. Half a year ago, due to nervousness and tiredness, stomach discomfort, vomiting, and then vomiting and heating due to poor mood, vomiting and vomiting in recent days, sw…	A	A	Answer: A Analysis: This question examines the understanding and application of acupuncture treatment in traditional Chinese medicine. According to the description of the symptoms in the question stem, it can be judged that the vomiting symptoms caused by liver qi and stomach are injurious. Therefore, in addition to the selection of corresponding acupuncture points, acupuncture treatment should a…	TRUE	YES	YES	NO
69	single-choice question	Acupuncture and Moxibustion	The following is a single-choice question from the Chinese Comprehensive Ability of Clinical Medicine (TCM) Examination. Please choose the correct answer and provide a correct and reasonable answer analysis. Female, 40 years old. Half a year ago, due to nervousness and tiredness, stomach discomfort, vomiting, and then vomiting and heating due to poor mood, vomiting and vomiting in recent days, sw…	B	B	Answer: B Analysis: This question mainly examines the mastery of the knowledge points of acupuncture treatment in traditional Chinese medicine. According to the description of the symptoms in the question stem, it can be judged that the vomiting symptoms caused by liver qi and stomach are injurious. In terms of treatment, the three main acupoints of CV6, PC6 and ST36 should be selected. CV6 is th…	TRUE	YES	YES	YES
70	single-choice question	Acupuncture and Moxibustion	The following is a single-choice question from the Chinese Comprehensive Ability of Clinical Medicine (TCM) Examination. Please choose the correct answer and provide a correct and reasonable answer analysis. Female, 40 years old. Half a year ago, due to nervousness and tiredness, stomach discomfort, vomiting, and then vomiting and heating due to poor mood, vomiting and vomiting in recent days, sw…	C	D	Answer: C Analysis: This question mainly examines the mastery of the knowledge points of acupuncture treatment in traditional Chinese medicine. According to the description of the symptoms in the question stem, the patient has symptoms of acid swallowing, and the two main acupoints of ST21 and LR14 should be selected for treatment. ST21 acupoint is the acupoint of the Taiyin and Spleen meridians …	FALSE	YES	YES	YES		YES
71	single-choice question	Acupuncture and Moxibustion	The following is a single-choice question from the Chinese Comprehensive Ability of Clinical Medicine (TCM) Examination. Please choose the correct answer and provide a correct and reasonable answer analysis. Female, 48 years old. He came to the clinic for more than a month because of pain in his right shoulder. Onset is slow, with gradual worsening pain. The pain on the lateral side of the should…	B	B	Answer: B Analysis: This question mainly examines the mastery of the knowledge points of meridian pattern differentiation in traditional Chinese medicine. According to the description of the symptoms in the stem, the patient is a 48-year-old woman who presents with pain in her right shoulder for more than a month, and the pain gradually worsens, mainly lateral shoulder pain, difficulty in abducti…	TRUE	YES	YES	NO
72	single-choice question	Acupuncture and Moxibustion	The following is a single-choice question from the Chinese Comprehensive Ability of Clinical Medicine (TCM) Examination. Please choose the correct answer and provide a correct and reasonable answer analysis. Female, 48 years old. He came to the clinic for more than a month because of pain in his right shoulder. Onset is slow, with gradual worsening pain. The pain on the lateral side of the should…	A	C	Answer: A.BL60 Analysis: This question examines the knowledge points of acupuncture treatment in traditional Chinese medicine. According to the stem description, the patient is a 48-year-old woman presenting with right shoulder pain for more than a month. The pain gradually worsens, mainly in the lateral shoulder, with difficulty in abducting the shoulder joint and exertion. The tongue is pale re…	FALSE	YES	YES	YES		YES
73	single-choice question	Acupuncture and Moxibustion	The following is a single-choice question from the Chinese Comprehensive Ability of Clinical Medicine (TCM) Examination. Please choose the correct answer and provide a correct and reasonable answer analysis. Female, 48 years old. He came to the clinic for more than a month because of pain in his right shoulder. Onset is slow, with gradual worsening pain. The pain on the lateral side of the should…	B	D	Answer: B.PC6, BL20; Analysis: This question examines the knowledge points of acupuncture treatment in traditional Chinese medicine. According to the stem description, the patient is a 48-year-old woman presenting with right shoulder pain for more than a month. The pain gradually worsens, mainly in the lateral shoulder, with difficulty in abducting the shoulder joint and exertion. The tongue is p…	FALSE	YES	YES	YES		YES
74	single-choice question	Humanistic Spirit of Medicine	The following is a single-choice question from the Chinese Comprehensive Ability of Clinical Medicine (TCM) Examination. Please choose the correct answer and provide a correct and reasonable answer analysis. The medical profession is a medical community that is accountable to the commitment expected of the public, and the following statements are incorrect: A. The medical profession does not requ…	A	A	Answer: A. The medical profession does not need to go through systematic training Analysis: The medical profession is an industry that requires self-discipline of the professional community, and its members need to master the basic knowledge and skills of medicine through systematic training. The medical profession maintains professional integrity and earns the trust of society through a strict a…	TRUE	YES	YES	NO
75	single-choice question	Humanistic Spirit of Medicine	The following is a single-choice question from the Chinese Comprehensive Ability of Clinical Medicine (TCM) Examination. Please choose the correct answer and provide a correct and reasonable answer analysis. What is not part of the patient's obligation in the doctor-patient relationship is () A. The patient has the obligation to truthfully inform the doctor about the condition B. The patient has …	D	D	Answer: D. The patient has an obligation to follow even unnecessary treatment Analysis: In the doctor-patient relationship, patients have certain obligations. Option A states that the patient needs to be truthful about the doctor's condition, which is an important obligation for the patient to make the correct diagnosis and treatment plan. Option B mentions that the patient needs to follow the do…	TRUE	YES	YES	NO
76	single-choice question	Humanistic Spirit of Medicine	The following is a single-choice question from the Chinese Comprehensive Ability of Clinical Medicine (TCM) Examination. Please choose the correct answer and provide a correct and reasonable answer analysis. Due to the inequality of medical knowledge between doctors and patients, patients are in a vulnerable position and rely on doctors. Patients entrust their health and life to medical staff, so…	B	B	Answer: B. trust relationship Analysis: The doctor-patient relationship is a special social relationship with its unique characteristics. In the doctor-patient relationship, due to the de facto inequality between doctors and patients in the possession of medical knowledge, patients are usually in a fragile and dependent position on doctors, who entrust their health and life to medical staff. Ther…	TRUE	YES	YES	NO
77	single-choice question	Humanistic Spirit of Medicine	The following is a single-choice question from the Chinese Comprehensive Ability of Clinical Medicine (TCM) Examination. Please choose the correct answer and provide a correct and reasonable answer analysis. Male, 35 years old. Because the radial shaft fracture was treated with plate internal fixation, the plate broke 3 months after operation, and the patient asked the hospital for compensation. …	D	D	Answer: D. Tell the patient that it is a steel plate quality problem and the hospital is not responsible for handling it Analysis: In the doctor-patient relationship, the hospital should always be patient-centered, actively listen to patients' complaints and explain and appease them. In this case, the patient made a claim for compensation for the steel plate fracture. The hospital should understa…	TRUE	YES	YES	NO
78	single-choice question	Humanistic Spirit of Medicine	The following is a single-choice question from the Chinese Comprehensive Ability of Clinical Medicine (TCM) Examination. Please choose the correct answer and provide a correct and reasonable answer analysis. It is an important clinical ethical principle to keep secrets for patients, and it is the obligation of doctors to protect patients' medical information. The following behaviors of doctors ca…	D	D	Answer: D. Provide authorized anonymous medical research information to peers upon request Analysis: In clinical practice, doctors have the obligation to protect the patient's medical information and abide by the principle of confidentiality. Unless the patient agrees or the law stipulates, the doctor cannot provide the medical information of the patient to a third party. However, in order to pro…	TRUE	YES	YES	NO
79	single-choice question	Humanistic Spirit of Medicine	The following is a single-choice question from the Chinese Comprehensive Ability of Clinical Medicine (TCM) Examination. Please choose the correct answer and provide a correct and reasonable answer analysis. What is incorrect about the ethics of informed consent principle is () A. The ethical requirements of informed consent should fully respect the principle of patient autonomy B. Informed conse…	B	B	Answer: B. Informed consent is only a signed document to obtain the patient's consent to treatment Analysis: Informed consent is a very important ethical principle in clinical medicine. It requires doctors to fully disclose relevant information to patients before carrying out any diagnosis, treatment or research activities, so that patients can understand the nature, purpose, possible risks and e…	TRUE	YES	YES	NO
80	single-choice question	Humanistic Spirit of Medicine	The following is a single-choice question from the Chinese Comprehensive Ability of Clinical Medicine (TCM) Examination. Please choose the correct answer and provide a correct and reasonable answer analysis. According to the ethical principles of clinical medical trial design, the following statements are correct () A. Experimental design should benefit both subjects and Society B. Experimental d…	A	C	Answer: A. The trial design should benefit both the subjects and the society Analysis: The ethical principle of clinical medical trial design requires that the trial design must comply with the ethical principle, and ensure the scientificity and reliability of the test results while protecting the rights and interests of the subjects. In this process, the experimental design should benefit both t…	FALSE	YES	YES	NO	YES	YES
81	single-choice question	Humanistic Spirit of Medicine	The following is a single-choice question from the Chinese Comprehensive Ability of Clinical Medicine (TCM) Examination. Please choose the correct answer and provide a correct and reasonable answer analysis. Female, 23 years old. After 7 weeks of pregnancy, she went to a clinic to ask for artificial abortion. The clinic arranged to employ Wang to perform the operation for him. Due to improper ope…	D	D	Answer: D. Investigate criminal responsibility according to law Analysis: According to the relevant provisions of China's "doctor law", doctors must obtain a doctor's license before they can engage in doctor's practice. In this question, Mr. Wang had no doctor's license, but had an induced abortion operation, and the patient died due to improper operation. His behavior has constituted the crime o…	TRUE	YES	YES	NO
82	single-choice question	Basic Theory of TCM	The following is a single-choice question from the Chinese Comprehensive Ability of Clinical Medicine (TCM) Examination. Please choose the correct answer and provide a correct and reasonable answer analysis. Reflecting the 'Wind moves' () A. The location of the disease is uncertain. B. It has the characteristics of ascending and dispersing. C. It often hurts people with other pathogenic factors. …	A	A	Answer: A. The location of the disease is uncertain. Analysis: The 'Wind moves' refers to the characteristics that the disease position moves and there is no fixed place when the wind evil invades the human body. In the five elements, wind belongs to wood, which has the characteristics of growth, ascending and dispersing. Therefore, when the pathogenic wind invades the human body, the disease pat…	TRUE	YES	YES	NO
83	single-choice question	Basic Theory of TCM	The following is a single choice question about the comprehensive ability of clinical medicine (traditional Chinese Medicine) test in China. Please choose the correct answer and generate a correct and reasonable answer analysis. What shows that 'Wind is the leading cause of diseases' is () A. The location of the disease is uncertain. B. It has the characteristics of ascending and dispersing. C. I…	A	C	Answer: A. the position of the disease is uncertain Analysis: Wind is the leading cause of diseases, which means that the wind pathogen is the main factor of external pathogenic factors, and has the characteristics of disease position vacillation. In the five elements, wind belongs to wood, which has the characteristics of growth, rise and evacuation. Therefore, when the wind pathogen invades the…	FALSE	YES	YES	NO		YES
84	single-choice question	Basic Theory of TCM	The following is a single-choice question from the Chinese Comprehensive Ability of Clinical Medicine (TCM) Examination. Please choose the correct answer and provide a correct and reasonable answer analysis. It is pointed out in Suwen, on the biography of specimen diseases that "the person who is ill first and then full in middle" should () A. Treat the tip B. Treat the root C. Treat both the tip…	B	A	Answer: B. Treat the root Analysis: Suwen is one of the classic works of traditional Chinese medicine, which mainly discusses the relationship between specimens of diseases and the principles of treatment. In the process of disease development, those who are sick first and then full of health, that is, the disease condition gradually develops from the internal pathogen to the external disease. At…	FALSE	YES	YES	YES		YES
85	single-choice question	Basic Theory of TCM	The following is a single-choice question from the Chinese Comprehensive Ability of Clinical Medicine (TCM) Examination. Please choose the correct answer and provide a correct and reasonable answer analysis. It is pointed out in Suwen, on the transmission of diseases in specimens that "the person who is hot first and then full in life" should () A. Treat the tip B. Treat the root C. Treat both th…	A	A	Answer: A. Treat the tip. Analysis: Suwen is one of the classic works of traditional Chinese medicine, which mainly discusses the relationship between specimens of diseases and the principles of treatment. In the process of disease development, those who are first hot and then medium full, that is, the disease gradually develops from internal heat pathogen to external medium full symptoms. At thi…	TRUE	YES	YES	YES
86	single-choice question	Diagnostics of TCM	The following is a single-choice question from the Chinese Comprehensive Ability of Clinical Medicine (TCM) Examination. Please choose the correct answer and provide a correct and reasonable answer analysis。 The patient with spleen deficiency and dampness can see the complexion () A.Pale yellow complexion B.Pale yellow and floating C. Pale yellow in the green D. Pale dull as smoke	B	B	Answer: B. Pale and flighty Analysis: In traditional Chinese medicine, the spleen is the main transport of water and humidity, if the temper is weak, it will lead to the stagnation of water and humidity, the formation of wet. Dampness is blocked in the skin, resulting in pale yellow complexion and buoyancy. Therefore, the patient with spleen deficiency and dampness can be seen with pale yellow co…	TRUE	YES	YES	YES
87	single-choice question	Diagnostics of TCM	The following is a single-choice question from the Chinese Comprehensive Ability of Clinical Medicine (TCM) Examination. Please choose the correct answer and provide a correct and reasonable answer analysis。 Patients with cold dampness trapped spleen can see the facial color () A. Pale yellow complexion B. pale yellow and floating C. yellow complexion with green color D. His face was dull and smo…	A	D	Analysis: In traditional Chinese medicine, the spleen is the main transport of water and humidity, if the temper is weak, it will lead to the stagnation of water and humidity, the formation of wet. Dampness is blocked in the skin, resulting in pale yellow complexion. Therefore, cold and damp trapped spleen patient face can be seen pale yellow color. Among the other options, the pale yellow face a…	FALSE	YES	YES	YES		YES
88	single-choice question	Diagnostics of TCM	The following is a single-choice question from the Chinese Comprehensive Ability of Clinical Medicine (TCM) Examination. Please choose the correct answer and provide a correct and reasonable answer analysis。 Amenorrhea infertility, hair loss teeth shaking, tinnitus amnesia, the diagnosis is () A. Kidney essence deficiency syndrome B. Kidney Yang deficiency syndrome C. kidney Yin deficiency syndro…	A	A	Answer: A. Kidney essence deficiency syndrome Analysis: In traditional Chinese medicine, kidney essence is the material basis of kidney, which has the functions of reproduction, growth and development, nourishing the body and so on. The clinical manifestations of kidney essence deficiency syndrome mainly include amenorrhea, infertility, tooth shaking, tinnitus and forgetfulness. Lack of kidney es…	TRUE	YES	YES	YES
89	single-choice question	Diagnostics of TCM	The following is a single-choice question from the Chinese Comprehensive Ability of Clinical Medicine (TCM) Examination. Please choose the correct answer and provide a correct and reasonable answer analysis。 Amenorrhea infertility, vertigo tinnitus, hot flushes night sweats, the diagnosis is () A. Kidney essence deficiency syndrome B. Kidney Yang deficiency syndrome C. kidney Yin deficiency syndr…	C	C	Answer: C. Kidney Yin deficiency syndrome Analysis: In traditional Chinese medicine, the clinical manifestations of kidney Yin deficiency syndrome mainly include amenorrhea, infertility, vertigo, tinnitus, hot flash and night sweats. Kidney Yin deficiency leads to insufficient sperm and blood, which affects reproductive function, so amenorrhea and infertility occur; The deficiency of kidney Yin l…	TRUE	YES	YES	YES
90	single-choice question	Pharmacology of TCM	The following is a single-choice question from the Chinese Comprehensive Ability of Clinical Medicine (TCM) Examination. Please choose the correct answer and provide a correct and reasonable answer analysis。 The Common effect of Leonurus and Achyranthes () A. Activating blood and regulating menstruation, dissolving water B. channeling milk through menstruation, diuresis and relieving drenching C.…	A	A	Answer: A. Promoting blood circulation, regulating menstruation and reducing water. Analysis: Motherwort and achyranthes are commonly used in traditional Chinese medicine, with a variety of effects. According to the requirements of the question, it is necessary to find the common effect of Leonurus and achyranthes. After analysis, we can draw the following conclusions: Motherwort has the function…	TRUE	YES	YES	NO
91	single-choice question	Pharmacology of TCM	The following is a single-choice question from the Chinese Comprehensive Ability of Clinical Medicine (TCM) Examination. Please choose the correct answer and provide a correct and reasonable answer analysis。 Mutong and Wang do not have the same effect () A. Activating blood and regulating menstruation, dissolving water B. channeling milk through menstruation, diuresis and relieving drenching C. A…	A	B	Answer: A. Promoting blood circulation and regulating menstruation to relieve water. Analysis: Wood Tong and Wang not to hang are commonly used herbs in traditional Chinese medicine, with a variety of effects. According to the requirements of the question, it is necessary to find the common effect of Mu Tong and Wang do not do. After analysis, we can draw the following conclusions: Mutong has the…	FALSE	YES	YES	NO	YES	YES
92	single-choice question	Pharmacology of TCM	The following is a single-choice question from the Chinese Comprehensive Ability of Clinical Medicine (TCM) Examination. Please choose the correct answer and provide a correct and reasonable answer analysis。 Can not only relieve pain, but also warm stop vomiting is () A. Wood fragrance B. Agarwood C. Incense and D. Aconitum	A	B	Answer: A. Wood fragrance Answer analysis: Wood fragrance is a common Chinese medicine, has the effect of qi analgesia and warm stop vomiting. Wood fragrance mainly acts on the spleen and stomach channels, and is good at clearing qi machinery and regulating qi stagnation, so it can effectively relieve the symptoms of stomach distending pain and abdominal pain. At the same time, it also has the ef…	FALSE	YES	YES	YES		YES
93	single-choice question	Pharmacology of TCM	The following is a single-choice question from the Chinese Comprehensive Ability of Clinical Medicine (TCM) Examination. Please choose the correct answer and provide a correct and reasonable answer analysis。 Can not only line qi pain, but also warm kidney to dispel cold is () A. Wood fragrance B. Agarwood C. Incense and D. Aconitum	D	D	"The correct answer is D. black medicine. Aconite can not only promote qi and relieve pain, but also warm kidney and dispel cold (D right). Wood fragrance (A wrong) can be qi analgesic, spleen digestion. Agarwood (B wrong) can relieve the pain of qi, warm and stop vomiting, reduce qi and relieve asthma. Xiangfu (C wrong) can relax the liver and relieve depression, regulate the menstrual flow and …	TRUE	YES	YES	YES
94	single-choice question	Formulas of TCM	The following is a single-choice question from the Chinese Comprehensive Ability of Clinical Medicine (TCM) Examination. Please choose the correct answer and provide a correct and reasonable answer analysis。 What is contained in Dachaihu Decoction and what is not in Xiaochaihu Decoction () A. Peony B. Pinellia C. Ginger D. licorice	C	A	"Answer: C. Ginger Big bupleurum decoction and small bupleurum decoction are commonly used prescriptions in traditional Chinese medicine, and their main difference lies in the composition of drugs. The main components of Dasaihu decoction include bupleurum, scutellaria, peony, pinellia, ginger, jujube, etc., while the main components of XiaoAihu decoction include bupleurum, Scutellaria, peony, pi…	FALSE	YES	YES	YES		YES
95	single-choice question	Formulas of TCM	The following is a single-choice question from the Chinese Comprehensive Ability of Clinical Medicine (TCM) Examination. Please choose the correct answer and provide a correct and reasonable answer analysis。 Xiaoxianxiong Decoction contains and Daxianxiong Decoction does not contain () A. Peony B. Pinellia C. Ginger D. licorice	C	B	"Answer: C. Ginger Answer analysis: Small chest Decoction and large chest Decoction are commonly used in traditional Chinese medicine prescriptions, their main difference lies in the composition of drugs. The main components of the decoction include Coptis, scutellaria, pinellia, ginger and jujube, while the main components of the decoction include Coptis, scutellaria, pinellia and jujube. It can…	FALSE	YES	YES	YES		YES
96	single-choice question	Formulas of TCM	The following is a single-choice question from the Chinese Comprehensive Ability of Clinical Medicine (TCM) Examination. Please choose the correct answer and provide a correct and reasonable answer analysis。 The etiology and pathogenesis of treating syndrome of Qinhao Biejia decoction are () A. Yin blood deficiency, wind evil spread in heat B. liver and kidney Yin deficiency, weak fire internal i…	C	C	Answer: C. In the later stage of febrile disease, Yin fluid is consumed, and evil Fu Yin points Answer analysis: Qinghao Biejia decoction is a kind of prescription for treating the late stage of febrile disease in Chinese medicine. In the late stage of febrile disease, the evil heat has damaged the Yin fluid, the Yin fluid is consumed, and the evil heat lurks in the Yin component. In this case, t…	TRUE	YES	YES	YES
97	single-choice question	Formulas of TCM	The following is a single-choice question from the Chinese Comprehensive Ability of Clinical Medicine (TCM) Examination. Please choose the correct answer and provide a correct and reasonable answer analysis。 The etiology and pathogenesis of treating syndromes of Gentiana Biejia powder are () A. Yin blood deficiency, wind evil spread in heat B. liver and kidney Yin deficiency, weak fire internal i…	C	A	Answer: C. In the later stage of febrile disease, Yin fluid is consumed, and evil Fu Yin points Answer analysis: Gentiana Biejia powder is a Chinese medicine treatment of the late febrile disease of a prescription. In the late stage of febrile disease, the evil heat has damaged the Yin fluid, the Yin fluid is consumed, and the evil heat lurks in the Yin component. In this case, the evil heat and …	FALSE	YES	YES	YES		YES
98	single-choice question	Internal Medicine of TCM	The following is a single-choice question from the Chinese Comprehensive Ability of Clinical Medicine (TCM) Examination. Please choose the correct answer and provide a correct and reasonable answer analysis。 Male, 27 years old. In the middle of winter, when I go out to work, I have sudden asthma, shortness of breath, cough, thin white sputum, cold headache, pale red tongue and thin white fur, and…	A	D	Answer: A. Maxingshigan Decoction Answer analysis: According to the disease description, the patient is male, 27 years old, in the middle of winter to go out to work, asthma, shortness of breath, cough, phlegm, thin white, cold headache and other symptoms. These manifestations suggest that the wind cold bundle surface, phlegm and dampness intrinsic. This is further confirmed by the light red tong…	FALSE	YES	YES	YES		YES
99	single-choice question	Internal Medicine of TCM	The following is a single-choice question from the Chinese Comprehensive Ability of Clinical Medicine (TCM) Examination. Please choose the correct answer and provide a correct and reasonable answer analysis。 Male, 42 years old, midsummer, long blowing air conditioning, sudden asthma, phlegm, thick yellow, cold body heat, no sweat, tongue red fur yellow, pulse floating and number. cure Use () A. M…	C	A	Answer: C. Qingjin Huatan Decoction Answer analysis: According to the description of the condition, the patient is male, 42 years old, in the summer for a long time to blow air conditioning, asthma, phlegm, thick yellow, cold body heat, no sweat and other symptoms. These manifestations suggest that the wind cold bundle surface, phlegm and dampness intrinsic. The tongue is red, the fur is yellow, …	FALSE	YES	YES	YES		YES
100	single-choice question	Internal Medicine of TCM	The following is a single-choice question from the Chinese Comprehensive Ability of Clinical Medicine (TCM) Examination. Please choose the correct answer and provide a correct and reasonable answer analysis。 Dementia is a deficiency of the sea of pulp, treatment should be selected () A. Qifu Yin B. Zuogui Wan C. Huanhao Dan D. Bazhen Decoction	A	A	"The correct answer is A. Seven blessed drinks. The clinical manifestations of dementia and insufficient myelin sea are mainly dizziness, tinnitus, mental decline, waist and knee weakness, forgottenness, slow speech, slow movement, thin tongue and thin pulse. Treating the kidney filling essence, filling the brain Rong heart, with seven Fu drink (A right). Qifu drink is composed of ginseng, white …	TRUE	YES	YES	YES
101	single-choice question	Internal Medicine of TCM	The following is a single-choice question from the Chinese Comprehensive Ability of Clinical Medicine (TCM) Examination. Please choose the correct answer and provide a correct and reasonable answer analysis. Dementia belongs to the deficiency of the spleen and kidney pattern. The treatment should choose: A. Qifu Decoction (Qifu Yin) B. Zuo Gui Wan (Zuo Gui Wan) C. Huanshao Pellet (Huanshao Dan) D…	C	C	The answer is: C. Huanshao Pellet (Huanshao Dan) Answer Explanation: Dementia belongs to the deficiency of the spleen and kidney pattern, and in treatment, a prescription that can strengthen the spleen and kidney and nourish essence and spirit should be selected. Huanshao Pellet is a traditional Chinese medicinal formula with such effects, and its main components include Shu Di Huang (Rehmannia G…	TRUE	YES	YES	YES
102	single-choice question	Acupuncture and Moxibustion	The following is a single-choice question from the Chinese Comprehensive Ability of Clinical Medicine (TCM) Examination. Please choose the correct answer and provide a correct and reasonable answer analysis Select the acupuncture points Ashi point, local meridian points, Yinlingquan(SP9), and Zusanli(ST36) for the treatment of the following condition: A. Migratory impediment B. Fixed impediment C…	C	B	Answer: C. Painful impediment Answer Explanation: In traditional Chinese medicine, the selection of Ashi points, local meridian points, Yinlingquan(SP9), and Zusanli(ST36) primarily treats painful impediment. Painful impediment refers to the condition where the invasion of pathogenic factors such as wind, cold, and dampness leads to pain, stiffness, and discomfort in the joints, muscles, and meri…	FALSE	YES	YES	NO		YES
103	single-choice question	Acupuncture and Moxibustion	The following is a single-choice question from the Chinese Comprehensive Ability of Clinical Medicine (TCM) Examination. Please choose the correct answer and provide a correct and reasonable answer analysis. The disease condition treated by selecting Ashi point, local meridian points, Spleen Transverse Meridian Point and the Sea of Blood is ( ) A. Migratory impediment B. Fixed impediment C. Painf…	D	A	Answer: D. Heat impediment Answer Analysis: In TCM, the main pathology selected for treatment with the Ashi point, local meridian points, Spleen Transverse Meridian Point and the Sea of Blood is Heat impediment. Heat impediment is a condition in which the joints, muscles, and tendons are painful, hot, and swollen due to the attack of heat. Ashi is the main point for heat impediment, which has the…	FALSE	YES	YES	NO		YES
104	single-choice question	Acupuncture and Moxibustion	The following is a single-choice question from the Chinese Comprehensive Ability of Clinical Medicine (TCM) Examination. Please choose the correct answer and provide a correct and reasonable answer analysis. Of the following acupuncture points, both of them are located 2 inches away from the anterior midline ( ) A. Kufang(ST14), Zhangmen(LR13) B. Shenshu(BL23), Tianzhu(BL10) C. Zhishi(BL52), Zhib…	A	D	Answer: A. Kufang(ST14) and Zhangmen(LR13) Answer Analysis: In TCM, acupuncture points are important points for treating diseases. Kufang(ST14) and Zhangmen(LR13) are both located 2 inches from the front center line. Kufang(ST14) is a Xi-cleft point of the stomach meridian and has the function of regulating qi and harmonizing the stomach, descending the rebellious qi and stopping vomiting; Zhangm…	FALSE	YES	YES	YES		YES
105	single-choice question	Acupuncture and Moxibustion	The following is a single-choice question from the Chinese Comprehensive Ability of Clinical Medicine (TCM) Examination. Please choose the correct answer and provide a correct and reasonable answer analysis. Of the following acupuncture points, both of them are located 3 inches away from the anterior midline ( ) A. Kufang(ST14), Zhangmen(LR13) B. Shenshu(BL23), Tianzhu(BL10) C. Zhishi(BL52), Zhib…	B	C	Answer: B. Shenshu(BL23), Tianzhu(BL10) Answer Analysis：In TCM, In TCM, acupuncture points are important points for treating diseases. Shenshu(BL23) and Tianzhu(BL10) are both located 3 inches from the posterior midline. Shenshu(BL23) is an acupuncture point of the kidney meridian, which has the function of tonifying the kidney, strengthening the waist, benefiting the essence and filling in the m…	FALSE	YES	YES	YES		YES
106	multiple-choice question	Basic Theory of TCM	The following is a multiple-choice question from the Chinese Comprehensive Ability of Clinical Medicine (TCM) Examination. For each sub-question, there are four options labeled A, B, C, and D, among which at least two meet the requirements of the question. Please choose the correct answers and generate a correct and reasonable answer analysis. The following narratives reflect that the human body …	ABCD	ABCD	Answer: ABCD Answer Analysis: In TCM, the human body is an organic whole with various organ systems interconnected and interacting with each other. This concept is reflected in the following aspects: A. The concept of the oneness of the five organs: the five organs refer to the heart, liver, spleen, lungs, and kidneys, which are coordinated and constrained by each other and work together to maint…	TRUE	YES	YES	YES
107	multiple-choice question	Basic Theory of TCM	The following is a multiple-choice question from the Chinese Comprehensive Ability of Clinical Medicine (TCM) Examination. For each sub-question, there are four options labeled A, B, C, and D, among which at least two meet the requirements of the question. Please choose the correct answers and generate a correct and reasonable answer analysis. Related to the theory of yin-yang interdependency is …	BD	AB	Answer: B, D Answer Analysis: The theory of yin-yang interdependency is an important academic thought of TCM, which emphasizes the interdependence and mutual use of yin and yang. In clinical practice, the theory of mutual rooting and utilazation of yin and yang guides the principles of treatment in TCM. Seeking yang from yin and treating yang in yin diseases are the treatment principles related t…	FALSE	YES	YES	NO	YES	YES
108	multiple-choice question	Basic Theory of TCM	The following is a multiple-choice question from the Chinese Comprehensive Ability of Clinical Medicine (TCM) Examination. For each sub-question, there are four options labeled A, B, C, and D, among which at least two meet the requirements of the question. A malfunction of the spleen's ascending function is ( ) A. Nausea and vomiting B. Abdominal swelling C. Prolonged diarrhea and prolapse D. Sub…	AC	BC	Answer: A, C Answer Analysis: the disorder of spleen's ascending function refers to an abnormality in the spleen's function of ascending the clear and descending the turbid, resulting in the water and grain essences not ascending normally, but instead tending downward. Based on this theory, we can analyze each option: A. Nausea and Vomiting: When the spleen's ascending and elevating function is a…	FALSE	YES	YES	YES		YES
109	multiple-choice question	Basic Theory of TCM	The following is a multiple-choice question from the Chinese Comprehensive Ability of Clinical Medicine (TCM) Examination. For each sub-question, there are four options labeled A, B, C, and D, among which at least two meet the requirements of the question. The relationship between the lungs and the kidneys is manifested as ( ) A. Promoting blood movement B. Respiratory movement C. Participating i…	CD	BCD	Answer: C, D Answer Analysis: The relationship between the lung and the kidney is mainly manifested in the following two aspects: C. Participation in fluid metabolism: the lung dominates qi and the kidney governs water, and the lung's function of difussion and purification regulates fluid metabolism in the whole body. Descent and purification of lung qi is conducive to the kidney's sealing and st…	FALSE	YES	YES	NO		YES
110	multiple-choice question	Basic Theory of TCM	The following is a multiple-choice question from the Chinese Comprehensive Ability of Clinical Medicine (TCM) Examination. For each sub-question, there are four options labeled A, B, C, and D, among which at least two meet the requirements of the question. About ying-nutrient qi, the correct is ( ) A. the nature of plagiarism and slippery B. sprinkled in the six fu-organs C. generated by the esse…	CD	BCD	Answer: C and D Answer Analysis: C. Generated from the essence of water and food: ying-nutrient qi is an important kind of qi in the human body, which is mainly generated from the essence of water and food. The essence of water and food is the basic material for the body's life activities, and after digestion and absorption by the spleen and stomach, it is transformed inBL67g-nutrient qi to nouri…	FALSE	YES	YES	YES		YES
111	multiple-choice question	Basic Theory of TCM	The following is a multiple-choice question from the Chinese Comprehensive Ability of Clinical Medicine (TCM) Examination. For each sub-question, there are four options labeled A, B, C, and D, among which at least two meet the requirements of the question. The following statement about the twelve divergent collaterals is correct ( ) A. There is no fixed relationship with the internal organs B. Th…	BCD	ABCD	Answer: B, C, D Answer Analysis: B. Both the collaterals and the main disease evidence: the twelve divergent collaterals are an important part of the meridian system, each of which is related to the corresponding luo-connecting points, and at the same time, each of which has its own main disease evidence, and by stimulating these collaterals and points, the relevant disease can be effectively tre…	FALSE	YES	YES	YES		YES
112	multiple-choice question	Basic Theory of TCM	The following is a multiple-choice question from the Chinese Comprehensive Ability of Clinical Medicine (TCM) Examination. For each sub-question, there are four options labeled A, B, C, and D, among which at least two meet the requirements of the question. According to "Su Wen - Wu Zang Generation", "eating too much sweetness" can lead to ( ) A. pain in bones and joints B. obesity C. dryness of m…	BC	AD	Answer: B, C Answer Analysis: According to "Plain Questions - Five Zang Generation", consuming too much sweet foods will affect human health. Sweet foods mainly refer to sweet and greasy foods. Excessive intake of such foods over a long period of time will easily lead to obesity, dry lips and other symptoms in the human body. Therefore, the correct answers to this question are B and C. The other …	FALSE	YES	YES	NO		YES
113	multiple-choice question	Basic Theory of TCM	The following is a multiple-choice question from the Chinese Comprehensive Ability of Clinical Medicine (TCM) Examination. For each sub-question, there are four options labeled A, B, C, and D, among which at least two meet the requirements of the question. The following about "internal dryness" statement, the correct is ( ) A. The onset of the disease is mostly in the autumn B. Mostly due to malf…	BCD	BCD	Answer: B, C, D Answer Analysis: Internal dryness is a pathological state characterized by yin deficiency and internal heat due to malfunction of the internal organs, resulting in a deficiency of fluid. The pathology of internal dryness is characterized by a deficiency of fluid, which is commonly found in the lungs, stomach and large intestine and other internal organs. Therefore, options B, C an…	TRUE	YES	YES	YES
114	multiple-choice question	Basic Theory of TCM	The following is a multiple-choice question from the Chinese Comprehensive Ability of Clinical Medicine (TCM) Examination. For each sub-question, there are four options labeled A, B, C, and D, among which at least two meet the requirements of the question. The following is correct in the description of the seven emotions that cause disease and directly injure internal organs ( ) A. first affect t…	ABC	ABCD	Answer: A, B, C Answer Analysis: The seven emotions causing disease means that changes in a person's emotions can lead to disease. The seven emotions include joy, anger, anxiety, thoughts, sorrow, fear and shock. If these emotional changes are too drastic or out of control for a long time, they can affect the function of the body's internal organs and lead to diseases. First of all, the seven emo…	FALSE	YES	YES	YES		YES
115	multiple-choice question	Basic Theory of TCM	The following is a multiple-choice question from the Chinese Comprehensive Ability of Clinical Medicine (TCM) Examination. For each sub-question, there are four options labeled A, B, C, and D, among which at least two meet the requirements of the question. Of the following, the one that belongs to the treatment of yang deficiency is () A. treating yang for yin patterns B. seeking yang from yin C.…	ABC	ABC	Answer: A, B, C Answer Analysis: Yang deficiency treatment is a method of treating yang deficiency pattern in TCM, the main purpose of which is to invigorate yang qi and strengthen the body's resistance. Yang deficiency pattern is characterized by a lack of yang qi, which is manifested by symptoms such as pale face, cold form and limbs, and fatigue. Yang deficiency treatment includes the followin…	TRUE	YES	YES	YES
116	multiple-choice question	Diagnostics of TCM	The following is a multiple-choice question from the Chinese Comprehensive Ability of Clinical Medicine (TCM) Examination. For each sub-question, there are four options labeled A, B, C, and D, among which at least two meet the requirements of the question. Of the following, a hypothermia can result from A. Qi deficiency B. Fluid retention C. Yin deficiency D. Qi stagnation	AC	ACD	Answer: A, C Answer Analysis: Hypothermia is a common condition in TCM that is characterized by a body temperature that is below the normal range but lasts for a long period of time. Hypothermia may be caused by a variety of reasons, including qi deficiency and yin deficiency. A. Qi deficiency: Qi deficiency refers to the insufficient functioning of the body's qi, which leads to a decrease in the…	FALSE	YES	YES	YES		YES
117	multiple-choice question	Diagnostics of TCM	The following is a multiple-choice question from the Chinese Comprehensive Ability of Clinical Medicine (TCM) Examination. For each sub-question, there are four options labeled A, B, C, and D, among which at least two meet the requirements of the question. The following pulse phenomena belong to the physiological variation of the pulse () A. Six yin pulse B. Deep pulse in obese people C. Floating…	AC	ABCD	Answer: A, C Answer Analysis: Physiologic variability of pulse is the individual difference in pulse appearance under normal physiologic state. Among the following pulses, the following are physiologic variations of the pulse: A. Six yin pulse: The six yin pulse is a pulse that is soft, gentle, and rhythmic. This kind of pulse can also appear in normal people, belonging to physiological variation…	FALSE	YES	YES	NO		YES
118	multiple-choice question	Diagnostics of TCM	The following is a multiple-choice question from the Chinese Comprehensive Ability of Clinical Medicine (TCM) Examination. For each sub-question, there are four options labeled A, B, C, and D, among which at least two meet the requirements of the question. The pulse signs that can be seen in a deficiency pattern are () A. fine pulse B. arterial pulsation C. tympanic pulse D. racing pulse	AC	ACD	Answer: A, C Answer Analysis: Deficiency pattern refers to a condition in which the body's healthy qi is insufficient, resulting in reducing or dysfunctional functions of the internal organs, meridians, qi and blood. In terms of pulse conditions, the common manifestations of deficiency pattern are: A. Fine pulse: Fine pulse refers to the small amplitude of pulse beat and feels thin and soft. This…	FALSE	YES	YES	YES		YES
119	multiple-choice question	Diagnostics of TCM	The following is a multiple-choice question from the Chinese Comprehensive Ability of Clinical Medicine (TCM) Examination. For each sub-question, there are four options labeled A, B, C, and D, among which at least two meet the requirements of the question. The following options can lead to a stiff tongue () A. Cold congealing the sinews B. Heat entering the pericardium C. Wind phlegm entering the…	AC	BCD	Answer: A, C Answer Analysis: A stiff tongue is a type of tongue that is stiff and cannot be stretched freely. Common causes of stiff tongue are: A. Cold congealing the sinews: Pathogenic cold invades the body and stagnates the tendons and veins, making the tongue stiff and unable to stretch freely. B. Heat entering the pericardium: Pathogenic heat invades the pericardium and disturbs the mind, w…	FALSE	YES	YES	NO	YES	YES
120	multiple-choice question	Diagnostics of TCM	The following is a multiple-choice question from the Chinese Comprehensive Ability of Clinical Medicine (TCM) Examination. For each sub-question, there are four options labeled A, B, C, and D, among which at least two meet the requirements of the question. The following are characteristics of "stomach reflux": () A. Eating in the morning and vomiting in the evening B. Eating in the evening and vo…	AC	AB	Answer: A, C Answer Analysis: Stomach reflux is a condition in which food is not properly digested and absorbed and vomiting occurs. Common features are: A. Vomiting in the morning and vomiting in the evening: this refers to food eaten in the morning and vomited out in the evening. C. Vomiting immediately after eating: this refers to vomiting out food as soon as it enters the stomach. B. Eating i…	FALSE	YES	YES	NO		YES
121	multiple-choice question	Diagnostics of TCM	The following is a multiple-choice question from the Chinese Comprehensive Ability of Clinical Medicine (TCM) Examination. For each sub-question, there are four options labeled A, B, C, and D, among which at least two meet the requirements of the question. Please choose the correct answers and generate a correct and reasonable answer analysis The following is () A. Aversion to cold and fever, hea…	B	ACD	Answer: B Answer: External and internal disease refers to the Chinese medical term, which means that the disease exists simultaneously in the surface and inside. Superficial symptoms, such as fever, chills, headache, body pain, etc. Inner refers to deep symptoms, such as abdominal pain, diarrhea, vomiting, thin loose stools, etc. In option A, aversion to cold, fever, head and body pain belong to …	FALSE	YES	YES	NO	YES	YES
122	multiple-choice question	Diagnostics of TCM	The following is a multiple-choice question from the Chinese Comprehensive Ability of Clinical Medicine (TCM) Examination. For each sub-question, there are four options labeled A, B, C, and D, among which at least two meet the requirements of the question. Please choose the correct answers and generate a correct and reasonable answer analysis Patients with high fever and thirst, more than the nex…	A	AC	Answer: A. heat syndrome turning cold Answer: According to the description of the problem stem, the patient initially presented with symptoms such as high heat and tiredness and thirst, low interest, red tongue and yellow pulse number, which belonged to heat syndrome. However, due to improper treatment, patients suddenly appear cold sweating, cold limbs, pale face, thin pulse and other symptoms, …	FALSE	YES	YES	NO		YES
123	multiple-choice question	Diagnostics of TCM	The following is a multiple-choice question from the Chinese Comprehensive Ability of Clinical Medicine (TCM) Examination. For each sub-question, there are four options labeled A, B, C, and D, among which at least two meet the requirements of the question. Please choose the correct answers and generate a correct and reasonable answer analysis The following options belong to the manifestation of l…	ABC	ABCD	Answer: A, B, C Answer: Liver-kidney Yin deficiency is a type of syndrome in traditional Chinese medicine, mainly manifested as deficiency of liver-kidney Yin fluid. Among the following choices, dizziness, tinnitus, forgetfulness and insomnia are typical manifestations of Yin deficiency of the liver and kidney, so the answer is A, B, C. Although small menstrual volume may be related to liver and …	FALSE	YES	YES	NO		YES
124	multiple-choice question	Diagnostics of TCM	The following is a multiple-choice question from the Chinese Comprehensive Ability of Clinical Medicine (TCM) Examination. For each sub-question, there are four options labeled A, B, C, and D, among which at least two meet the requirements of the question. Please choose the correct answers and generate a correct and reasonable answer analysis Stomach Yin deficiency syndrome and stomach fire incan…	AC	AB	"A, C Answer: Stomach Yin deficiency syndrome and stomach fire incandescent syndrome are common gastric syndrome types in traditional Chinese medicine. Stomach Yin deficiency syndrome is mainly manifested as insufficient stomach Yin fluid, while stomach fire incandescency syndrome is manifested as excessive stomach Yang. These two types of syndrome may present the symptoms of epigastric pain and …	FALSE	YES	YES	NO		YES
125	multiple-choice question	Diagnostics of TCM	The following is a multiple-choice question from the Chinese Comprehensive Ability of Clinical Medicine (TCM) Examination. For each sub-question, there are four options labeled A, B, C, and D, among which at least two meet the requirements of the question. Please choose the correct answers and generate a correct and reasonable answer analysis Among the following options, can be seen in the spleen…	ACD	ABCD	A, C, D Answer: Spleen failure to control blood is a common syndrome type of spleen dysfunction in traditional Chinese medicine, mainly manifested as weakness of temper and loss of control blood. The symptoms of this syndrome may include: A. Muscle bleeding: Because the spleen does not regulate the blood, the blood cannot operate normally, and subcutaneous bleeding points are prone to occur, such…	FALSE	YES	YES	YES		YES
126	multiple-choice question	Pharmacology of TCM	The following is a multiple-choice question from the Chinese Comprehensive Ability of Clinical Medicine (TCM) Examination. For each sub-question, there are four options labeled A, B, C, and D, among which at least two meet the requirements of the question. Please choose the correct answers and generate a correct and reasonable answer analysis The following drugs that should not be used with licor…	ABCD	ABD	Answer: A, B, C, D Answer: In TCM theory, the compatibility and use of drugs need to follow certain principles in order to give full play to the efficacy of drugs and reduce adverse reactions. Licorice is a commonly used Chinese medicine, which has the functions of clearing heat and detoxifying, and harmonizing other medicines. However, in some cases, licorice cannot be used with other medication…	FALSE	YES	YES	YES		YES
127	multiple-choice question	Pharmacology of TCM	The following is a multiple-choice question from the Chinese Comprehensive Ability of Clinical Medicine (TCM) Examination. For each sub-question, there are four options labeled A, B, C, and D, among which at least two meet the requirements of the question. Please choose the correct answers and generate a correct and reasonable answer analysis Treatment of lung carbuncle, commonly used drugs are (…	AC	ACD	"A, C Answer: Pulmonary carbuncle is a kind of disease in traditional Chinese medicine, mainly manifested as cough, vomiting of pus, blood and phlegm and other symptoms. The drugs for the treatment of lung carbuncle need to have the effects of clearing heat and detoxifying, reducing swelling and discharging pus. Of the four options given, both reed root and Houttuynia have these effects. A. Luige…	FALSE	YES	YES	YES		YES
128	multiple-choice question	Pharmacology of TCM	The following is a multiple-choice question from the Chinese Comprehensive Ability of Clinical Medicine (TCM) Examination. For each sub-question, there are four options labeled A, B, C, and D, among which at least two meet the requirements of the question. Please choose the correct answers and generate a correct and reasonable answer analysis Drugs that both reduce water and strengthen the spleen…	CD	BCD	"C, D Answer: Tuckahoe and white art are commonly used Chinese medicine, they both have the effect of water and spleen strengthening. C. Poria: Poria sweet taste, light, flat. Heart, lung, spleen, kidney channel. It has the effect of moistening the water, strengthening the spleen and stomach, calming the heart and calming the mind. D. Baizhu: Baizhu has sweet, bitter and warm taste. Spleen, stoma…	FALSE	YES	YES	YES	YES
129	multiple-choice question	Pharmacology of TCM	The following is a multiple-choice question from the Chinese Comprehensive Ability of Clinical Medicine (TCM) Examination. For each sub-question, there are four options labeled A, B, C, and D, among which at least two meet the requirements of the question. Please choose the correct answers and generate a correct and reasonable answer analysis The indications of Thunberg Fritillary are () A. Wind-…	AC	AC	"A, C Answer: Thunberg Fritillaria is a commonly used Chinese medicine, mainly has the effect of clearing heat, eliminating phlegm and relieving cough. A. Wind-heat cough: Fritillary fritillary can treat wind-heat cough, because it has the effect of clearing heat and eliminating phlegm, can effectively relieve the symptoms caused by wind-heat cough. C. Phlegm-heat cough: Fritillary fritillary can…	TRUE	YES	YES	YES
130	multiple-choice question	Pharmacology of TCM	The following is a multiple-choice question from the Chinese Comprehensive Ability of Clinical Medicine (TCM) Examination. For each sub-question, there are four options labeled A, B, C, and D, among which at least two meet the requirements of the question. Please choose the correct answers and generate a correct and reasonable answer analysis The efficacy of Eucommia is () A. dispelling wind-damp…	ABC	BCD	Answer: A, B, C Answer: Eucommia is a commonly used Chinese medicine, which mainly has the effects of dispelling wind and dampness, tonifying liver and kidney, and strengthening muscles and bones. A. Wind-dampness: Eucommia can effectively treat rheumatic diseases, such as rheumatoid arthritis, waist and leg pain, etc., because of its wind-dampness effect. B. Nourishing the liver and kidney: Eupe…	FALSE	YES	YES	YES		YES
131	multiple-choice question	Pharmacology of TCM	The following is a multiple-choice question from the Chinese Comprehensive Ability of Clinical Medicine (TCM) Examination. For each sub-question, there are four options labeled A, B, C, and D, among which at least two meet the requirements of the question. Please choose the correct answers and generate a correct and reasonable answer analysis Of the following drugs, pregnant women should be cauti…	AC	ABCD	"A, C Answer: A. Cinnamon: Cinnamon has the effect of warming the meridian, dispelling cold and relieving pain, but pregnant women should use it with caution, because cinnamon has the effect of promoting blood circulation and removing blood stasis, which may cause uterine contraction and increase the risk of miscarriage. B. Qu Mai: Qu Mai has the effect of clearing heat and detoxification, diuret…	FALSE	YES	YES	YES		YES
132	multiple-choice question	Pharmacology of TCM	The following is a multiple-choice question from the Chinese Comprehensive Ability of Clinical Medicine (TCM) Examination. For each sub-question, there are four options labeled A, B, C, and D, among which at least two meet the requirements of the question. Please choose the correct answers and generate a correct and reasonable answer analysis The following treatment of rheumatic fever, commonly u…	ACD	ABC	"A, C, D Answer: A. Gentiana: Gentiana has A spicy, bitter and warm taste. It has the effect of dispelling wind dampness, stopping arthralgia pain, relieving surface and dispelling wind. It is suitable for the treatment of rheumatic heat arthralgia. C. Collateralized rattan: Collateralized rattan has bitter and cool taste, has the effect of dispelling wind dampness, channeling meridians and block…	FALSE	YES	YES	YES		YES
133	multiple-choice question	Pharmacology of TCM	The following is a multiple-choice question from the Chinese Comprehensive Ability of Clinical Medicine (TCM) Examination. For each sub-question, there are four options labeled A, B, C, and D, among which at least two meet the requirements of the question. Please choose the correct answers and generate a correct and reasonable answer analysis Panax notoginseng and Pu Huang are mainly used in () A…	CD	ACD	"C, D Answer: C. bruising injury: Panax Notoginseng and Puhuang both have the function of promoting blood circulation and removing blood stasis, reducing swelling and relieving pain, and have a good therapeutic effect on blood stasis pain caused by bruising injury. D. Stasis and bleeding: Panax Notoginseng and typha can promote blood circulation and eliminate blood stasis, so it also has a certai…	FALSE	YES	YES	YES		YES
134	multiple-choice question	Pharmacology of TCM	The following is a multiple-choice question from the Chinese Comprehensive Ability of Clinical Medicine (TCM) Examination. For each sub-question, there are four options labeled A, B, C, and D, among which at least two meet the requirements of the question. Please choose the correct answers and generate a correct and reasonable answer analysis Oyster Treatment () A. spermatosynopsis B. palpitation…	ABD	ABCD	Answer: A, B, D Answer: A. spermatosynopsis: Oyster has the effect of astringent and astringent, which has A good improvement effect on symptoms such as spermatosynopsis. B. Fright and palpitation: oysters can calm the mind and resolve, and have a good relieving effect on the symptoms of fright and palpitation, palpitation and insomnia. D. Scrofula gall: Oysters have a soft, hard and loose effect…	FALSE	YES	YES	NO		YES
135	multiple-choice question	Pharmacology of TCM	The following is a multiple-choice question from the Chinese Comprehensive Ability of Clinical Medicine (TCM) Examination. For each sub-question, there are four options labeled A, B, C, and D, among which at least two meet the requirements of the question. Please choose the correct answers and generate a correct and reasonable answer analysis Indications of calamine () A. wet sores itching B. unr…	ACD	ABC	"A, C, D Answer: A. wet sore itching: calamine has the effect of removing dampness and relieving itching, and has A good improvement effect on symptoms such as wet sore itching. C. Red eye barrier: calamine to the liver channel, can clear the liver and clear the eyes, for red eye swelling pain, pannus blocking symptoms have a good relieving effect. D. Sore throat: calamine can clear heat and deto…	FALSE	YES	YES	NO		YES
136	multiple-choice question	Formulas of TCM	The following is a multiple-choice question from the Chinese Comprehensive Ability of Clinical Medicine (TCM) Examination. For each sub-question, there are four options labeled A, B, C, and D, among which at least two meet the requirements of the question. Please choose the correct answers and generate a correct and reasonable answer analysis Belonging to the "Israeli legal Authority" are () A. T…	ABC	ABCD	Answer: A, B, C Answer: In traditional Chinese medicine, the legal prescription refers to the treatment method as the basis, will have similar therapeutic effects of the prescription together to form a unified treatment principle. Among them, the dispatching side of law, the class side of law and the group side of law belong to the category of "regulating side by law". A. Fa Zhen prescription: Ac…	FALSE	YES	YES	YES		YES
137	multiple-choice question	Formulas of TCM	The following is a multiple-choice question from the Chinese Comprehensive Ability of Clinical Medicine (TCM) Examination. For each sub-question, there are four options labeled A, B, C, and D, among which at least two meet the requirements of the question. Please choose the correct answers and generate a correct and reasonable answer analysis The formulae classified according to their function or…	AD	BD	"A, D Answer: In traditional Chinese medicine, there are many methods for the classification of prescriptions, among which seven prescriptions and ten prescriptions are classified according to their function or treatment. A. Seven prescriptions: According to the function of the prescription is divided into seven categories, respectively, are relieving surface, reconciling, clearing heat, purging …	FALSE	YES	YES	YES		YES
138	multiple-choice question	Formulas of TCM	The following is a multiple-choice question from the Chinese Comprehensive Ability of Clinical Medicine (TCM) Examination. For each sub-question, there are four options labeled A, B, C, and D, among which at least two meet the requirements of the question. Please choose the correct answers and generate a correct and reasonable answer analysis The Intention of Combining Cohosh with Stomach Clearin…	AD	ABD	"A, D Answer: The purpose of combining cohosh with Qingwei powder is to expend fire and reduce fire without cooling. A. Spreading fire: Cohosh has the effect of spreading fire, can help other drugs in Qingwei powder direct to the disease, enhance the effect of clearing heat and detoxification. D. Make fire without cooling suppression: Cohoshen has the effect of lifting Yang, which can prevent hea…	FALSE	YES	YES	YES		YES
139	multiple-choice question	Formulas of TCM	The following is a multiple-choice question from the Chinese Comprehensive Ability of Clinical Medicine (TCM) Examination. For each sub-question, there are four options labeled A, B, C, and D, among which at least two meet the requirements of the question. Please choose the correct answers and generate a correct and reasonable answer analysis The following are Chuanxiong Chadiao based on () A. Th…	AB	ABD	"Answer: A, B Answer: The formulation of ChuanxiongChatiaosan prescription is mainly based on the external wind and the top of the top, only the wind medicine can reach. A. Weifeng Yishan powder: Chuanxiong Chatiao powder is mainly used to treat headache, dizziness and other symptoms caused by exogenous wind pathogens. Wind evil bundle surface, Weiyang not xuan, evil is fighting, then cold fever,…	FALSE	YES	YES	YES		YES
140	multiple-choice question	Formulas of TCM	The following is a multiple-choice question from the Chinese Comprehensive Ability of Clinical Medicine (TCM) Examination. For each sub-question, there are four options labeled A, B, C, and D, among which at least two meet the requirements of the question. Please choose the correct answers and generate a correct and reasonable answer analysis The combination of pinellia sinensis and Ophiopogon, w…	A	AD	Answer: A Answer: The combination of pinellia and ophiopogon, the prescription of "eliminating sex and preserving use" is ophiopogon decoction. Maidangtang is a prescription in Zhang Zhongjing's Synopsis of Golden Chamber. It is mainly used to treat lung and stomach diseases. Pinellia has the function of tempering and drying dampness, reducing regress and stopping vomiting, while Ophiopogon has t…	FALSE	YES	YES	YES		YES
141	multiple-choice question	Formulas of TCM	The following is a multiple-choice question from the Chinese Comprehensive Ability of Clinical Medicine (TCM) Examination. For each sub-question, there are four options labeled A, B, C, and D, among which at least two meet the requirements of the question. Please choose the correct answers and generate a correct and reasonable answer analysis Gastrodia Guteng drink and Dendrobium night light Wan …	C	AC	"C Answer: Tianma Guteng drink and Dendrobium night light Wan both have the function of calming liver and calming wind. Gastrodia Guteng drink is mainly composed of Gastrodia, Guteng, Dendrobium and other medicinal materials. It has the effect of calming liver and extinguishing wind, clearing heat and promoting blood circulation, and tonifying liver and kidney. Dendrobium night light Wan is mainl…	FALSE	YES	YES	YES	YES	YES
142	multiple-choice question	Formulas of TCM	The following is a multiple-choice question from the Chinese Comprehensive Ability of Clinical Medicine (TCM) Examination. For each sub-question, there are four options labeled A, B, C, and D, among which at least two meet the requirements of the question. Please choose the correct answers and generate a correct and reasonable answer analysis The following formulae for the treatment of spontaneou…	BC	ABC	"Answer: BC Answer: B. Yupingfeng Powder: Yupingfeng powder is a prescription for strengthening surface and preventing perspiration. It is mainly used to treat surface deficiency and spontaneous perspiration. Its main components are cassia twig, white art, licorice, etc., with beneficial qi solid surface, harmonizing Yingwei effect. C. Oyster powder: Oyster powder is also a prescription for stren…	FALSE	YES	YES	YES		YES
143	multiple-choice question	Formulas of TCM	The following is a multiple-choice question from the Chinese Comprehensive Ability of Clinical Medicine (TCM) Examination. For each sub-question, there are four options labeled A, B, C, and D, among which at least two meet the requirements of the question. Please choose the correct answers and generate a correct and reasonable answer analysis The following formulae for supplementing lung qi, nour…	AD	AB	"Answer: AD Answer: A. Jiuxian SAN: Jiuxian SAN is A kind of prescription for tonifying lung qi, nourishing lung Yin and treating chronic cough. The main ingredients include ginseng, Astragalus, cooked rehmannia, ophiopogon, etc., which has the effect of tonifying qi and nourishing Yin, moistening lung and relieving cough. D. Yangyin Qingfei Decoction: Yangyin Qingfei Decoction is also a prescrip…	FALSE	YES	YES	YES		YES
144	multiple-choice question	Formulas of TCM	The following is a multiple-choice question from the Chinese Comprehensive Ability of Clinical Medicine (TCM) Examination. For each sub-question, there are four options labeled A, B, C, and D, among which at least two meet the requirements of the question. Please choose the correct answers and generate a correct and reasonable answer analysis The following derivatives of Guizhi Decoction are () A…	BC	ABC	Answer: BC Answer: B. Huangqi and Guizhi Wuwu Decoction: Huangqi and Guizhi Wuwu Decoction is one of the derivatives of Guizhi decoction, which is composed of Guizhi, Huangqi, peony, licorice, ginger, date and so on. This formula has the effect of beneficial qi dissolving surface, harmonizing Yingwei, and is suitable for Taiyang surface deficiency syndrome. C. Xiaojianzhong Decoction : Xiaojianzh…	FALSE	YES	YES	YES		YES
145	multiple-choice question	Formulas of TCM	The following is a multiple-choice question from the Chinese Comprehensive Ability of Clinical Medicine (TCM) Examination. For each sub-question, there are four options labeled A, B, C, and D, among which at least two meet the requirements of the question. Please choose the correct answers and generate a correct and reasonable answer analysis The following statements about Buyang Huanwu decoction…	AD	ABCD	"A, D Answer: A. Suitable for those caused by Qi deficiency and blood stasis: Buyang Huanwu Decoction mainly consists of astragalus, Angelica, Chuanxiong, peach kernel, safflower, Dilong, etc., which has beneficial effects of Qi activating blood, removing blood stasis and clearing collaterals, and is suitable for Qi deficiency and blood stasis syndrome of stroke sequelae. D. It takes a long time …	FALSE	YES	YES	YES		YES
146	multiple-choice question	Internal Medicine of TCM	The following is a multiple-choice question from the Chinese Comprehensive Ability of Clinical Medicine (TCM) Examination. For each sub-question, there are four options labeled A, B, C, and D, among which at least two meet the requirements of the question. Please choose the correct answers and generate a correct and reasonable answer analysis Treatments that can be used for jue confirmation inclu…	AD	ABCD	"A, D Answer: A. Resuscitation and awakening: The treatment of the confirmed syndrome of syncope requires the opening of the blocked qi machine to restore the operation of qi and blood. The awakening of the body helps to regulate the mind, promote the patency of qi, and thus improve the symptoms of syncope. D. Activating blood circulation and removing blood stasis: the syndrome of jue may be acco…	FALSE	YES	YES	YES		YES
147	multiple-choice question	Internal Medicine of TCM	The following is a multiple-choice question from the Chinese Comprehensive Ability of Clinical Medicine (TCM) Examination. For each sub-question, there are four options labeled A, B, C, and D, among which at least two meet the requirements of the question. Please choose the correct answers and generate a correct and reasonable answer analysis The following blood syndrome can be treated by Guipi d…	ABD	ABD	Answer: A, B, D Answer: A. Nosebleed syndrome of Qi and blood deficiency: Guipi Decoction has the effect of nourishing qi and blood, and is suitable for the treatment of nosebleed caused by Qi and blood deficiency. B. Vomiting blood is Qi deficiency and blood overflow syndrome: Guipi Decoction can strengthen spleen Qi and nourish blood, which is suitable for the treatment of vomiting blood caused…	TRUE	YES	YES	NO
148	multiple-choice question	Internal Medicine of TCM	The following is a multiple-choice question from the Chinese Comprehensive Ability of Clinical Medicine (TCM) Examination. For each sub-question, there are four options labeled A, B, C, and D, among which at least two meet the requirements of the question. Please choose the correct answers and generate a correct and reasonable answer analysis Among the following pathologic factors associated with…	ACD	ACD	"A, C, D Answer: Arthralgia syndrome is a common disease in traditional Chinese medicine, mainly manifested as pain, numbness and limited activity of muscles, muscles, bones and joints. The main pathological factors related to BI syndrome are wind, cold, dampness, heat, phlegm and stasis. A. Wind, cold: wind evil and cold evil invade the human body, easily lead to BI syndrome, manifested as pain,…	TRUE	YES	YES	YES
149	multiple-choice question	Internal Medicine of TCM	The following is a multiple-choice question from the Chinese Comprehensive Ability of Clinical Medicine (TCM) Examination. For each sub-question, there are four options labeled A, B, C, and D, among which at least two meet the requirements of the question. Please choose the correct answers and generate a correct and reasonable answer analysis The clinical features of diarrhea and dysentery are ()…	ABCD	ABC	"The correct answer is: B. Both diarrhea and dysentery can be seen in increased frequency of stool, often with the clinical manifestations of posterior tenesiosis (D right), but diarrhea without posterior tenesiosis. More frequent in summer and autumn season (A right), feeling exogenous evil or internal injury diet disease (B right), lesions involving the large intestine (C right) are manifestati…	FALSE	YES	YES	YES		YES
150	multiple-choice question	Internal Medicine of TCM	The following is a multiple-choice question from the Chinese Comprehensive Ability of Clinical Medicine (TCM) Examination. For each sub-question, there are four options labeled A, B, C, and D, among which at least two meet the requirements of the question. Please choose the correct answers and generate a correct and reasonable answer analysis The distinguishing points of wind-cold cold and wind-h…	BC	BC	"B, C Answer: The difference between wind-cold cold and wind-heat cold is mainly manifested in the difference of symptoms. Both wind-cold cold and wind-heat cold have common symptoms such as aversion to cold, fever, nasal congestion, runny nose, etc., but they also have some differences, which is the key to identifying the two: Cold cold: severe aversion to cold, light fever, no sweat, nose runny…	TRUE	YES	YES	NO
151	multiple-choice question	Internal Medicine of TCM	The following is a multiple-choice question from the Chinese Comprehensive Ability of Clinical Medicine (TCM) Examination. For each sub-question, there are four options labeled A, B, C, and D, among which at least two meet the requirements of the question. Please choose the correct answers and generate a correct and reasonable answer analysis The main points of syndrome differentiation of stomach…	AB	ABC	"Answer: A, B Answer: Stomachache is one of the common symptoms of traditional Chinese medicine. The main points of syndrome differentiation include the nature, location, time and the relationship between the pain and diet. Among them, the nature and location of pain is the key to distinguish between qi stagnation and blood stasis: Qi stagnation type stomach pain: pain is distending pain or sting…	FALSE	YES	YES	YES	YES
152	multiple-choice question	Internal Medicine of TCM	The following is a multiple-choice question from the Chinese Comprehensive Ability of Clinical Medicine (TCM) Examination. For each sub-question, there are four options labeled A, B, C, and D, among which at least two meet the requirements of the question. Please choose the correct answers and generate a correct and reasonable answer analysis Suitable for the treatment of blood syndrome different…	AC	AB	"A, C Answer: Hemorrhoea is a common disease in traditional Chinese medicine, mainly manifested as painful urination, red urine, blood in urine and so on. The treatment of hemorrhea should be treated according to the cause and condition. Among the options given, both Xiaojiyinzi and Shiweisan are suitable for the treatment of blood syndrome differentiation. Small thistle Yinzi plus or minus: main…	FALSE	YES	YES	YES		YES
153	multiple-choice question	Internal Medicine of TCM	The following is a multiple-choice question from the Chinese Comprehensive Ability of Clinical Medicine (TCM) Examination. For each sub-question, there are four options labeled A, B, C, and D, among which at least two meet the requirements of the question. Please choose the correct answers and generate a correct and reasonable answer analysis Female, 46 years old, there are clumps on both sides o…	AC	AC	"A, C Answer: According to the description of the condition, the patient was a female, 46 years old, there were clumps on both sides of the Adam's apple for 3 years, and in the past two weeks, there were palpitations and restlessness, upset little sleep, dry and sweaty eyes, finger trembling, red tongue with little moss, and thin pulse strings. These symptoms are manifested as Yin deficiency fire…	TRUE	YES	YES	YES
154	multiple-choice question	Internal Medicine of TCM	The following is a multiple-choice question from the Chinese Comprehensive Ability of Clinical Medicine (TCM) Examination. For each sub-question, there are four options labeled A, B, C, and D, among which at least two meet the requirements of the question. Please choose the correct answers and generate a correct and reasonable answer analysis Belongs to internal injury fever treatment is () A. Su…	ABC	ABC	Answer: A, B, C Answer: Internal injury fever refers to the fever symptoms caused by stagnation of qi, blood and water dampness or imbalance of qi, blood, Yin and Yang. In the treatment of internal injury fever, the corresponding treatment method should be adopted according to the specific syndrome type. A. Supplementing qi and nourishing blood: It is suitable for syndrome type of Qi deficiency a…	TRUE	YES	YES	YES
155	multiple-choice question	Internal Medicine of TCM	The following is a multiple-choice question from the Chinese Comprehensive Ability of Clinical Medicine (TCM) Examination. For each sub-question, there are four options labeled A, B, C, and D, among which at least two meet the requirements of the question. Please choose the correct answers and generate a correct and reasonable answer analysis The diseases of phlegm-drinking syndrome that can be t…	AC	AD	"A, C Answer: Xiaoqinglong Decoction is a commonly used prescription for treating phlegm and fluid disease in traditional Chinese medicine. Phlegm-drinking syndrome is a disease caused by abnormal water metabolism, which is manifested as cough, chest tightness, shortness of breath, sore throat and so on. According to the different types of phlegm-drinking syndrome, Xiaoqinglong decoction can be u…	FALSE	YES	YES	YES		YES
156	multiple-choice question	Internal Medicine of TCM	The following is a multiple-choice question from the Chinese Comprehensive Ability of Clinical Medicine (TCM) Examination. For each sub-question, there are four options labeled A, B, C, and D, among which at least two meet the requirements of the question. Please choose the correct answers and generate a correct and reasonable answer analysis The causes of exhaustion are () A. Lack of endowments,…	ABCD	ABCD	Answer: A, B, C, D Answer: Asthenia is a kind of disease in TCM, mainly manifested as qi deficiency, blood deficiency, Yin deficiency, Yang deficiency and so on. The causes of deficiency are various, including lack of endowment, overwork, mistreatment and serious illness. A. Lack of endowment, weak physique: endowment refers to the physical characteristics of individuals at birth, lack of endowme…	TRUE	YES	YES	NO
157	multiple-choice question	Internal Medicine of TCM	The following is a multiple-choice question from the Chinese Comprehensive Ability of Clinical Medicine (TCM) Examination. For each sub-question, there are four options labeled A, B, C, and D, among which at least two meet the requirements of the question. Please choose the correct answers and generate a correct and reasonable answer analysis Common treatments for real secrets include () A. Drain…	AB	AB	"Answer: A, B Answer: Full mystery is a kind of disease in traditional Chinese medicine, mainly manifested as dry stool, abdominal distension and abdominal pain. The main treatment methods for the real secret include draining heat and guiding hysteresis, moistening bowel and regulating qi and guiding hysteresis, and reducing reverse defecation. A. Draining heat to guide stagnation, moistening bow…	TRUE	YES	YES	YES
158	multiple-choice question	Acupuncture and Moxibustion	The following is a multiple-choice question from the Chinese Comprehensive Ability of Clinical Medicine (TCM) Examination. For each sub-question, there are four options labeled A, B, C, and D, among which at least two meet the requirements of the question. Please choose the correct answers and generate a correct and reasonable answer analysis According to the rules of the fourteen channels and po…	AD	BD	"A, D Answer: According to the law of fourteen meridians and acupoints of traditional Chinese medicine, the three Yang meridians of the hand, Ren and Du can treat mental diseases. A. Hand sanyang Meridian: Hand Sanyang Meridian includes Hand Yangming Large intestine Meridian, hand Shaoyang Sanjiao Meridian and hand Taiyang Small intestine meridian. These meridian points can treat mental diseases,…	FALSE	YES	YES	YES		YES
159	multiple-choice question	Acupuncture and Moxibustion	The following is a multiple-choice question from the Chinese Comprehensive Ability of Clinical Medicine (TCM) Examination. For each sub-question, there are four options labeled A, B, C, and D, among which at least two meet the requirements of the question. Please choose the correct answers and generate a correct and reasonable answer analysis Among the following five acupoints, the five elements …	BC	AD	"B, C Answer: The five acupoints refer to the five important acupoints of the five viscera and six fu-organs in the meridian system of traditional Chinese medicine, corresponding to the five elements (metal, wood, water, fire and earth). According to the relationship between the five elements, the Ying-spring points of the five elements are: B. HT9: HT9 is the Xingpoint of the hand Shaoyin heart …	FALSE	YES	YES	NO		YES
160	multiple-choice question	Acupuncture and Moxibustion	The following is a multiple-choice question from the Chinese Comprehensive Ability of Clinical Medicine (TCM) Examination. For each sub-question, there are four options labeled A, B, C, and D, among which at least two meet the requirements of the question. Please choose the correct answers and generate a correct and reasonable answer analysis Among the following groups of acupoints, none of which…	A	BC	Answer: A Answer: In traditional Chinese acupuncture, different acupoint stimulation and acupuncture methods have their own characteristics. Among the following groups of acupoints, Xinyu and LU11 are commonly used acupoints with shallow needling. A. BL15, LU11: BL15 is the acupoint of the hand Taiyang small intestine meridian, LU11 is the acupoint of the hand Taiyin lung meridian, they are commo…	FALSE	YES	YES	YES	YES	YES
161	multiple-choice question	Acupuncture and Moxibustion	The following is a multiple-choice question from the Chinese Comprehensive Ability of Clinical Medicine (TCM) Examination. For each sub-question, there are four options labeled A, B, C, and D, among which at least two meet the requirements of the question. Please choose the correct answers and generate a correct and reasonable answer analysis The following descriptions of the distance between the…	B	ABC	Answer: B Answer: In traditional Chinese acupuncture, the distance between different acupuncture points is specified. In the following groups of acupoints, the distance between Dazi and Baihui is 10 inches. A. The maximum distance between Chi Ze and hole is 5 inches: Chi ze is the acupoint of the hand Taiyin Lung meridian, and the hole is the most important acupoint of the hand Taiyin Lung meridi…	FALSE	YES	YES	YES		YES
162	multiple-choice question	Acupuncture and Moxibustion	The following is a multiple-choice question from the Chinese Comprehensive Ability of Clinical Medicine (TCM) Examination. For each sub-question, there are four options labeled A, B, C, and D, among which at least two meet the requirements of the question. Please choose the correct answers and generate a correct and reasonable answer analysis Among the following options, Measures to prevent stick…	AD	AB	"A, D Answer: Needle stagnation is a common phenomenon in the process of acupuncture, mainly due to the patient's physique, acupuncture techniques and other factors caused. The prevention measures mainly include the following points: A. Explain to the patient before acupuncture and choose the right position: this is an important measure to prevent needle stagnation, through the explanation of pat…	FALSE	YES	YES	NO		YES
163	multiple-choice question	Acupuncture and Moxibustion	The following is a multiple-choice question from the Chinese Comprehensive Ability of Clinical Medicine (TCM) Examination. For each sub-question, there are four options labeled A, B, C, and D, among which at least two meet the requirements of the question. Please choose the correct answers and generate a correct and reasonable answer analysis Both the eight pulse intersection point and the collat…	BC	BCD	"B, C Answer: The eight meridian confluence point refers to the acupoint connected with the eight channels of the odd meridian, and the Luo point refers to the fifteen collaterals separated from the meridians. The acupoints of both the eight pulse confluence point and the collaterals point are PC6 and SP4. B. PC6: PC6 is the collateral-point of the hand Taiyin lung Meridian, and it is also one of…	FALSE	YES	YES	YES		YES
164	multiple-choice question	Acupuncture and Moxibustion	The following is a multiple-choice question from the Chinese Comprehensive Ability of Clinical Medicine (TCM) Examination. For each sub-question, there are four options labeled A, B, C, and D, among which at least two meet the requirements of the question. Please choose the correct answers and generate a correct and reasonable answer analysis The following acupuncture points belong to the bladder…	B	ABD	Answer: B Answer: A. BL15: BL15 is the acupoint of the small intestine meridian of the hand Taiyang, not The bladder meridian of foot-Taiyang. BL1: BL1 is the acupoint of The bladder meridian of foot-Taiyang, but does not belong to the following groups of acupoints. B. BL67: BL67 is the acupoint of The bladder meridian of foot-Taiyang, belonging to the following groups of acupoints. BL32: BL32 is…	FALSE	YES	YES	YES		YES
165	multiple-choice question	Acupuncture and Moxibustion	The following is a multiple-choice question from the Chinese Comprehensive Ability of Clinical Medicine (TCM) Examination. For each sub-question, there are four options labeled A, B, C, and D, among which at least two meet the requirements of the question. Please choose the correct answers and generate a correct and reasonable answer analysis The following statement about the location of acupoint…	D	ABC	"D Answer: A. SI8: The small sea is located in the medial elbow, when the humerus epicondyle and the olecranon between the depression, inconsistent with the description of the title. B. PC6:PC6 is 5 inches above the transverse stripe of the distal end of the palm side of the wrist, between the tendon of the palm long and the flexor tendon of the wrist of the radial side, which does not match the …	FALSE	YES	YES	NO	YES	YES

## Sheet: SparkDesk
Number	Type	Subject	Question	The chosen answer from response	Correct answer	LLM's response	Evaluation metrics				Reasons for incorrect response
							Accuracy(TRUE/FALSE)	Logical reasoning(YES/NO)	Ability to use internal information(YES/NO)	Ability to use external information(YES/NO)	Logical error	Information error
1	single-choice question	Basic Theory of TCM	The following is a single-choice question from the Chinese Comprehensive Ability of Clinical Medicine (TCM) Examination. Please choose the correct answer and provide a correct and reasonable answer analysis. The theoretical basis of "seek yang within yin" is ( ) A. Yang gets Yin and is not overly rebellious B. Yin is helped by Yang but not stagnant C. Yang is helped by Yin and biochemical is infi…	B	C	Answer: Choose B from this question Analysis: "seek yang within yin" is an important concept in traditional Chinese medicine theory. It refers to the use of appropriate methods to stimulate the vitality of Yang Qi in the treatment of Yin syndrome (such as cold, dampness, deficiency, etc.), in order to achieve the goal of restoring health. Therefore, the correct answer in option B is "yin receives…	FALSE	YES	YES	YES		YES
2	single-choice question	Basic Theory of TCM	The following is a single-choice question from the Chinese Comprehensive Ability of Clinical Medicine (TCM) Examination. Please choose the correct answer and provide a correct and reasonable answer analysis. According to mutual generation and control among the five elements, the principle of restraining the strong and supporting the weak is demonstrated by ( ) A.Warming the kidney and tonifying t…	A	D	Analysis: According to the law of the Five Elements, the principle of restraining the strong and supporting the weak is reflected in mother- supplementing childdraining method. Answer: Choose A from this question	FALSE	NO	YES	NO		YES
3	single-choice question	Basic Theory of TCM	The following is a single-choice question from the Chinese Comprehensive Ability of Clinical Medicine (TCM) Examination. Please choose the correct answer and provide a correct and reasonable answer analysis. What is the expression of a man's "fifty eight" in "The Innocence of Ancient Times" A has strong muscles and bones B. has fallen teeth and withers C. has exhausted the body D. has a burnt face	A	B	Firstly, we need to understand that "five or eight" in the question stem refers to a man's performance at the age of five or eight. According to the discussion in "The Simple Question of Ancient Innocence", at the age of five or eight, a man's muscles and bones will flourish. Next, we will analyze the correctness of each option: A. Prosperous muscles and bones: in line with the performance of men…	FALSE	YES	YES	YES		YES
4	single-choice question	Basic Theory of TCM	The following is a single-choice question from the Chinese Comprehensive Ability of Clinical Medicine (TCM) Examination. Please choose the correct answer and provide a correct and reasonable answer analysis. According to the Suwen, the Sanjiao is called () A The receiving and holding organ B. The conveyance organ C. The dredging and draining organ D. The reservoir organ	C	C	Analysis: According to the Suwen, the Sanjiao is known as the dredging and draining organ, and it can pass through waterways. Answer: Choose C from this question	TRUE	YES	YES	NO
5	single-choice question	Basic Theory of TCM	The following is a single-choice question from the Chinese Comprehensive Ability of Clinical Medicine (TCM) Examination. Please choose the correct answer and provide a correct and reasonable answer analysis. The theoretical basis for the saying "Do not sweat in a family with bleeding" is () A Qi can generate fluid B. Fluid can carry gas C. Homogeny of essence and blood D. Homogeny of fluid and bl…	D	D	Analysis: According to Article 86 of "Treatise on Cold Damage", one should not sweat at home. Sweating will cause the forehead to sink, the pulse will be urgent and tight, and one cannot sleep when looking directly at it. This is because there is a close relationship between body fluid and blood, and there is a saying that "homogeny of fluid and blood"; In the theory of typhoid fever, there is a …	TRUE	YES	YES	YES
6	single-choice question	Basic Theory of TCM	The following is a single-choice question from the Chinese Comprehensive Ability of Clinical Medicine (TCM) Examination. Please choose the correct answer and provide a correct and reasonable answer analysis. The smallest collateral is () A Tertiary collateral vessel B. Bie collateral vessel C. Superficial collateral vessel D. Blood collateral vessel	A	A	Analysis: According to the "Fundamentals of Traditional Chinese Medicine", the 15 collaterals in the body are relatively large, and those that float in the superficial parts of the collaterals are called floating collaterals. The smallest branch of the collaterals is called the tertiary collateral vessel., which runs throughout the body. Answer: Choose A from this question	TRUE	YES	YES	YES
7	single-choice question	Basic Theory of TCM	The following is a single-choice question from the Chinese Comprehensive Ability of Clinical Medicine (TCM) Examination. Please choose the correct answer and provide a correct and reasonable answer analysis. What is the pathogenesis of external heat pathogen, characterized by thirst, liking to drink, shortness of breath, and fatigue A. Summer heat damages the heart and qi B. Summer heat Damage to…	D	D	Analysis: According to my search results, the pathogenesis of external Summer heat pathogenic factors, symptoms such as thirst, liking to drink, and shortness of breath and weakness, is summer Summer heat ascends and disperses, which damages the body and consumes qi. Answer: Choose D from this question	TRUE	NO	NO	NO
8	single-choice question	Basic Theory of TCM	The following is a single-choice question from the Chinese Comprehensive Ability of Clinical Medicine (TCM) Examination. Please choose the correct answer and provide a correct and reasonable answer analysis. "Excess manifesting with extreme deficiency" refers to () A. Excessive evil energy leads to the decline of positive energy, manifested as external "deficiency" B. Weak positive energy leads t…	D	C	Analysis: "When the body declines to a certain extent, sometimes there may be excessive excess of evil energy that does not match the essence of deficiency syndrome.". The occurrence of these excess phenomena is due to the low activity of internal organs, deficiency of qi and blood, or unfavorable qi mechanism, which hinders the smooth flow of qi and blood, resulting in certain signs of excess. A…	FALSE	YES	YES	NO	YES
9	single-choice question	Basic Theory of TCM	The following is a single-choice question from the Chinese Comprehensive Ability of Clinical Medicine (TCM) Examination. Please choose the correct answer and provide a correct and reasonable answer analysis. For those with bleeding from metrorrhagia and a dark purple color mixed with blood clots, the appropriate treatment is () A. Convergence and hemostasis B. Boost qi to contain blood C. Warming…	D	D	Analysis: For those who experience bleeding due to metrorrhagia and have a dark purple color with blood clots, it is recommended to treat blood stasis and stop bleeding. Answer: Choose D from this question	TRUE	NO	NO	NO
10	single-choice question	Diagnostics of TCM	The following is a single-choice question from the Chinese Comprehensive Ability of Clinical Medicine (TCM) Examination. Please choose the correct answer and provide a correct and reasonable answer analysis. What is not a common indication of bluish and black facial complexion? A. Blood stasis pattern, Pain B. Blood stasis pattern, Infantile convulsions C. Cold pattern, Pain D. Cold pattern, Bloo…	C	B	Analysis: Cold syndrome and pain do not belong to the common main syndrome of blue and black complexion. Answer: Choose C from this question	FALSE	NO	NO	NO		YES
11	single-choice question	Diagnostics of TCM	The following is a single-choice question from the Chinese Comprehensive Ability of Clinical Medicine (TCM) Examination. Please choose the correct answer and provide a correct and reasonable answer analysis. Which of the following symptoms can be seen as tenesmus A. Dampness-heat in the spleen B. Cold-dampness encumbering the spleen C. Intestinal heat and bowel excess D. Large intestinal dampness…	C	D	Analysis: Tenesmus is discomfort in the lower abdomen, wanting to relieve bowel movements, but unable to release quickly. The anus, rectum, and medullary tail are prone to bloating, and there is always a feeling of incomplete defecation. Answer: Choose C from this question	FALSE	YES	YES	NO	YES	YES
12	single-choice question	Diagnostics of TCM	The following is a single-choice question from the Chinese Comprehensive Ability of Clinical Medicine (TCM) Examination. Please choose the correct answer and provide a correct and reasonable answer analysis. Which of the following options does not belong to the main disease of dry fur A. Excessive heat and evil B. Deficiency of yin fluid C. Internal accumulation of dampness and evil D. Qi not tra…	C	C	Analysis: What does not belong to the main disease of dry fur is the internal accumulation of dampness. Answer: Choose C from this question	TRUE	NO	NO	NO
13	single-choice question	Diagnostics of TCM	The following is a single-choice question from the Chinese Comprehensive Ability of Clinical Medicine (TCM) Examination. Please choose the correct answer and provide a correct and reasonable answer analysis. Which of the following options belongs to the same manifestation of heat and heat syndrome A. Aversion to cold with fever, sore throat B. Fever and sweating, thirst and yellow urine C. Fever …	B	B	Analysis: Both the pathogenic summer heat pattern and pathogenic fire pattern are characterized by symptoms such as fever, thirst, and short yellow urine. Answer: Choose B from this question	TRUE	YES	YES	NO
14	single-choice question	Diagnostics of TCM	The following is a single-choice question from the Chinese Comprehensive Ability of Clinical Medicine (TCM) Examination. Please choose the correct answer and provide a correct and reasonable answer analysis. Which of the following options does not belong to the clinical manifestations of Water-ffuid retention pattern A. Spit water B. Chest tightness and palpitations D. Excessive vaginal discharge	D	D	Analysis: What does not belong to the clinical manifestation of water-ffuid retention pattern is excessive vaginal discharge. Answer: Choose D from this question	TRUE	NO	NO	NO
15	single-choice question	Diagnostics of TCM	The following is a single-choice question from the Chinese Comprehensive Ability of Clinical Medicine (TCM) Examination. Please choose the correct answer and provide a correct and reasonable answer analysis. Which of the following options does not belong to the clinical manifestations of blood heat pattern A. Spotted purple black color B. Repeated bleeding with blood clots C. Fresh red and sticky…	D	B	Analysis: What does not belong to the clinical manifestation of blood heat pattern is excessive vaginal discharge. Answer: Choose D from this question	FALSE	NO	NO	NO		YES
16	single-choice question	Diagnostics of TCM	The following is a single-choice question from the Chinese Comprehensive Ability of Clinical Medicine (TCM) Examination. Please choose the correct answer and provide a correct and reasonable answer analysis. Symptoms include palpitations and restlessness, insomnia and frequent dreaming, hot flashes and night sweats, redness in the cheekbones, redness in the tongue and lack of fluids, and thin pul…	A	A	Analysis: Symptoms include palpitations and restlessness, insomnia and frequent dreaming, hot flashes and night sweats, redness in the cheekbones, redness in the tongue and lack of fluids, and thin pulse count. The syndrome belongs to heart yin deficiency. Answer: Choose A from this question	TRUE	NO	NO	NO
17	single-choice question	Diagnostics of TCM	The following is a single-choice question from the Chinese Comprehensive Ability of Clinical Medicine (TCM) Examination. Please choose the correct answer and provide a correct and reasonable answer analysis. According to the "Shang Han Lun" Treatise on Cold Damage, those who suffer from both Taiyang pattern and Shaoyang pattern simultaneously belong to () A. Combined disorder B. Concurrent collat…	B	B	Analysis: According to the "Shang Han Lun", those who suffer from both Taiyang pattern and Shaoyang pattern simultaneously belong to the category of concurrent collateral pattern. Answer: Choose B from this question	TRUE	NO	NO	NO
18	single-choice question	Diagnostics of TCM	The following is a single-choice question from the Chinese Comprehensive Ability of Clinical Medicine (TCM) Examination. Please choose the correct answer and provide a correct and reasonable answer analysis. Which of the following options is visible in the Damp heat in the liver and gallbladder pattern but not in the Damp heat accumulating in the spleen pattern A. Yellow body and eyes B. Yellow a…	D	D	Analysis: According to "Shang Hai Lun", the manifestations of Damp heat in the liver and gallbladder pattern include rib swelling and pain, burning, abdominal distension and anorexia, bitter and evil taste, short red or yellow urine, and irregular bowel movements. The manifestations of Damp heat accumulating in the spleen pattern include insufficient appetite, nausea, bloating, loose stools, yell…	TRUE	YES	YES	NO
19	single-choice question	Pharmacology of TCM	The following is a single-choice question from the Chinese Comprehensive Ability of Clinical Medicine (TCM) Examination. Please choose the correct answer and provide a correct and reasonable answer analysis. According to the theory of medicinal properties, most of the drugs used to treat edema and inhibited urination have the flavor of ( ) A. Astringent flavor B. Bland flavor C. Salty flavor D. B…	B	B	Analysis: According to the theory of medicinal properties, most drugs that treat oedema and inhibited urination have a bland flavour. Answer: Choose B from this question	TRUE	NO	NO	NO
20	single-choice question	Pharmacology of TCM	The following is a single-choice question from the Chinese Comprehensive Ability of Clinical Medicine (TCM) Examination. Please choose the correct answer and provide a correct and reasonable answer analysis. Which of the following options is the most suitable medication for treating solid heat stagnation and dry stool A. Cassiae Semen B. Sennae Folium C. Polygoni Cuspidati Rhizoma Et Radix D. Nat…	D	D	Analysis: Natrii Sulfas is particularly suitable for treating patients with solid heat accumulation and dry stool. Answer: Choose D from this question	TRUE	NO	NO	NO
21	single-choice question	Pharmacology of TCM	The following is a single-choice question from the Chinese Comprehensive Ability of Clinical Medicine (TCM) Examination. Please choose the correct answer and provide a correct and reasonable answer analysis. What are the common effects of Aconiti Lateralis Radix Praeparata and Cinnamomi Cortex A. Restore yang to save from collapse,warm the middle to check vomiting B. Inducing fire to return to th…	C	C	Analysis: The common effect of Aconiti Lateralis Radix Praeparata and Cinnamomi Cortex is to Tonify fire and assist yang, dissipate cold and alleviate pain. Answer: Choose C from this question	TRUE	NO	NO	NO
22	single-choice question	Pharmacology of TCM	The following is a single-choice question from the Chinese Comprehensive Ability of Clinical Medicine (TCM) Examination. Please choose the correct answer and provide a correct and reasonable answer analysis. Which of the following Parasite-expelling medicines has a bitter, spicy, and warm nature, and belongs to the stomach and large intestine A. Nan Gua Zi B. He Cao Ya C. Arecae Semen D. Torreyae…	A	C	Analysis: According to the theory of traditional Chinese medicine, Nan Gua Zi have a bitter, spicy, and warm flavour, and belong to the stomach and large intestine. Answer: Choose A from this question	FALSE	NO	NO	NO		YES
23	single-choice question	Pharmacology of TCM	The following is a single-choice question from the Chinese Comprehensive Ability of Clinical Medicine (TCM) Examination. Please choose the correct answer and provide a correct and reasonable answer analysis. What is the daily dosage of Cinnabarisis commonly taken as a powder A. 0.015-0.03g B.0.1-0.5g C.1-2g D.3-5g	B	B	Analysis: Cinnabaris is often taken as a powder, with a daily dosage of 0.1-0.5g. Answer: Choose B from this question	TRUE	NO	NO	NO
24	single-choice question	Pharmacology of TCM	The following is a single-choice question from the Chinese Comprehensive Ability of Clinical Medicine (TCM) Examination. Please choose the correct answer and provide a correct and reasonable answer analysis. What is the best medicine for astringe the intestine and stop diarrhoea that should be simmered, for regulating the lungs, clearing heat, promoting swallowing and opening sounds, and for prom…	B	A	Analysis: According to the theory of traditional Chinese medicine, the medicine suitable for astringe the intestine and stop diarrhoea is Terminalia chebula. Schisandrae Chinensis Fructus is a suitable medicine for regulating the lungs and clearing heat, promoting swallowing and opening the throat. Answer: Choose B from this question	FALSE	YES	YES	NO		YES
25	single-choice question	Pharmacology of TCM	The following is a single-choice question from the Chinese Comprehensive Ability of Clinical Medicine (TCM) Examination. Please choose the correct answer and provide a correct and reasonable answer analysis. What is the effect of Cimicifugae Rhizomae A. Promote skin eruption B. Ascending yang to stop diarrhea C. Soothe the liver and regulate qi D. Promote fluid production to quench thirst	B	A	Analysis: The effect of cohosh is to increase yang and stop diarrhea. Answer: Choose B from this question	FALSE	NO	NO	NO		YES
26	single-choice question	Pharmacology of TCM	The following is a single-choice question from the Chinese Comprehensive Ability of Clinical Medicine (TCM) Examination. Please choose the correct answer and provide a correct and reasonable answer analysis. What is the medication that has the effects of warming the lungs, clearing phlegm, promoting qi, dispersing nodules, unblocking collaterals, and relieving pain A.Cynanchi Stauntonii Rhizoma E…	B	C	Analysis: The drug with the functions of warming the lungs, clearing phlegm, promoting qi, dispersing knots, unblocking collaterals, and relieving pain is Asarum. Answer: Choose B from this question	FALSE	NO	NO	NO		YES
27	single-choice question	Pharmacology of TCM	The following is a single-choice question from the Chinese Comprehensive Ability of Clinical Medicine (TCM) Examination. Please choose the correct answer and provide a correct and reasonable answer analysis. Medications that can not only soothe the liver, promote qi circulation, relieve depression, but also stimulate the stomach, digest food, and strengthen the spleen A. Rose B. Bergamot C. Malt …	B	C	Analysis: According to my search results, the medication that can not only soothe the liver, promote qi circulation, relieve depression, but also stimulate the stomach, digest food, and strengthen the spleen is bergamot. Answer: Choose B from this question	FALSE	NO	NO	NO		YES
28	single-choice question	Formulas of TCM	The following is a single-choice question from the Chinese Comprehensive Ability of Clinical Medicine (TCM) Examination. Please choose the correct answer and provide a correct and reasonable answer analysis. What are the drugs in both Qianghuo Shengshi Decoction and Daqin Jiao Decoction A. Atractylodis Rhizoma and Angelicae Pubescentis Radix B. Chuanxiong Rhizoma and Saposhnikoviae Radix C.Ligust…	B	B	Analysis: The drugs used in both Qianghuo Shengshi Decoction and Daqin Jiao Decoction are Chuanxiong Rhizoma and Saposhnikoviae Radix. Answer: Choose B from this question	TRUE	NO	NO	NO
29	single-choice question	Formulas of TCM	The following is a single-choice question from the Chinese Comprehensive Ability of Clinical Medicine (TCM) Examination. Please choose the correct answer and provide a correct and reasonable answer analysis. What is the medication that is contained in the Bixie Fenqing drink in "Yang Shi Jia Cang Fang", but not in the Bixie Fenqing drink in "Yi Xue Xin Xu" A. Linderae Radix, Yizhiren B. Atractylo…	A	A	Analysis: According to my search results, "Yang Shi Jia Cang" Bixie Fenqing Yin contains drugs such as Linderae Radix, Yizhiren, while the Bixie Fenqing Yin in "Yi Xue Xin Xu" does not contain drugs such as Linderae Radix. Answer: Choose A from this question	TRUE	NO	NO	NO
30	single-choice question	Formulas of TCM	The following is a single-choice question from the Chinese Comprehensive Ability of Clinical Medicine (TCM) Examination. Please choose the correct answer and provide a correct and reasonable answer analysis. What is the efficacy of Wu Zhu Yu Decoction A. Warm in the middle to dispel cold, slow and urgent to relieve pain B. Warm in the middle to supplement deficiency, lower adverse reactions and s…	B	B	Analysis: The efficacy of Wu Zhu Yu Decoction is to warm the middle and tonify deficiency, lower stress and stop vomiting. Answer: Choose B from this question	TRUE	NO	NO	NO
31	single-choice question	Formulas of TCM	The following is a single-choice question from the Chinese Comprehensive Ability of Clinical Medicine (TCM) Examination. Please choose the correct answer and provide a correct and reasonable answer analysis What are the benefits of both Zi Jin Ding and Xian Fang Huo Ming Yin A. Clearing heat and detoxifying B. Reducing swelling and pain C. Removing decay and promoting muscle growth D. Softening a…	A	B	Analysis: Both Zi Jin Ding and Xian Fang Huo Ming Yin have the effect of clearing heat and detoxifying. Answer: Choose A from this question	FALSE	NO	NO	NO		YES
32	single-choice question	Formulas of TCM	The following is a single-choice question from the Chinese Comprehensive Ability of Clinical Medicine (TCM) Examination. Please choose the correct answer and provide a correct and reasonable answer analysis What is the prescription theory that emphasizes the dual nourishment of Qi and blood, with a focus on supplementing Qi and promoting the self generation of Qi and blood to nourish blood and ca…	B	A	Analysis: Dang Gui Bu Xue Decoction is a formula that emphasizes the dual nourishment of qi and blood, with a focus on nourishing qi and promoting blood circulation to nourish blood and calm the mind.	FALSE	NO	NO	NO		YES
33	single-choice question	Formulas of TCM	The following is a single-choice question from the Chinese Comprehensive Ability of Clinical Medicine (TCM) Examination. Please choose the correct answer and provide a correct and reasonable answer analysis. What is the formula for clearing up heat and purging heat A. Da Cheng Qi Decoction B.Huang Lian Jie Du Decoction C. Liang Ge San D.Ge Gen Qin Lian Decoction	C	C	Analysis: The clearing and purging processes operate simultaneously, with the purging aimed at clearing heat and resolving congestion. The formula for this purging process is known as Liang Ge San . Answer: Select C from this question	TRUE	NO	NO	NO
34	single-choice question	Formulas of TCM	The following is a single-choice question from the Chinese Comprehensive Ability of Clinical Medicine (TCM) Examination. Please choose the correct answer and provide a correct and reasonable answer analysis Indicating frequent urination, it can also be used to treat enuresis. The formula for enuresis is () A. Jin Suo Gu Jing Wan B. Sang Piao Xiao San C. Shen Qi Wan D. You Gui Wan	B	B	Analysis: Sang Piao Xiao San is a traditional Chinese medicine formula that is used to treat frequent urination, as well as enuresis and nocturnal emissions. Answer: Choose B from this question	TRUE	NO	NO	NO
35	single-choice question	Formulas of TCM	The following is a single-choice question from the Chinese Comprehensive Ability of Clinical Medicine (TCM) Examination. Please choose the correct answer and provide a correct and reasonable answer analysis What is the formula for treating women who suffer from various symptomatic diseases and have persistent leakage? It can also be used to treat amenorrhea or postpartum lochia and abdominal pain…	D	D	Analysis: Gui Zhi Fu Ling Wan is mainly used to treat women with persistent diseases. If the menstrual cycle does not last for three months and the leakage persists, and the fetal movement is on the navel, it is a chronic disease. Answer: Choose D from this question	TRUE	YES	YES	NO
36	single-choice question	Formulas of TCM	The following is a single-choice question from the Chinese Comprehensive Ability of Clinical Medicine (TCM) Examination. Please choose the correct answer and provide a correct and reasonable answer analysis The application of Si Ni Decoction is recommended for patients with symptoms such as limb syncope, chills, and curling up. The pulse may be weak and the pulse may recur from below, but the rem…	D	B	Analysis: Si Ni Decoction is mainly used to treat the syndrome of Yang deficiency and cold transformation in Shaoyin disease. Symptoms include limb syncope and inversion, aversion to cold and curling up, slight and complex pulse from the bottom, and although the benefit is stopped, the remaining symptoms are still present. Adding pig bile can warm and dispel cold. Answer: Choose D from this quest…	FALSE	YES	YES	NO		YES
37	single-choice question	Internal Medicine of TCM	The following is a single-choice question from the Chinese Comprehensive Ability of Clinical Medicine (TCM) Examination. Please choose the correct answer and provide a correct and reasonable answer analysis Female, 49 years old. Insomnia for 4 months, restlessness and difficulty falling asleep, palpitations and frequent dreams accompanied by dizziness and tinnitus, soreness and weakness in the wa…	C	C	Analysis: Based on the patient's symptoms, such as insomnia, restlessness and insomnia, difficulty falling asleep, palpitations and frequent dreaming accompanied by dizziness and tinnitus, soreness and weakness in the waist and knees, hot flashes and night sweats, restless heat in the five hearts, and dry throat and insufficient saliva, it can be determined that the patient belongs to the Kidney …	TRUE	YES	YES	NO
38	single-choice question	Internal Medicine of TCM	The following is a single-choice question from the Chinese Comprehensive Ability of Clinical Medicine (TCM) Examination. Please choose the correct answer and provide a correct and reasonable answer analysis Female, 34 years old, coughing for 3 months, chest X-ray shows increased texture in both lower lungs. Coughing and thrusting, chest and flank swelling and pain, dry throat and bitter mouth, le…	C	C	Analysis: Based on the patient's symptoms, such as coughing, chest and rib swelling and pain, dry throat and bitter mouth, insufficient phlegm and sticky texture, red tongue and thin yellow coating, and pulse string, it can be determined that the patient belongs to the Liver ffre affecting the lung pattern. Answer: Choose C from this question	TRUE	YES	YES	NO
39	single-choice question	Internal Medicine of TCM	The following is a single-choice question from the Chinese Comprehensive Ability of Clinical Medicine (TCM) Examination. Please choose the correct answer and provide a correct and reasonable answer analysis. Female, 28 years old, experienced external symptoms a week ago, with aversion to cold and fever, and head and body pain. Symptoms include: cough, yellow phlegm, wheezing in the throat, shortn…	A	B	Analysis: Female, 28 years old, experienced external symptoms a week ago, with aversion to cold and fever, and head and body pain. Symptoms include coughing with yellow phlegm, wheezing in the throat, shortness of breath, dry and thirsty mouth, red tongue, yellow coating, and smooth pulse. It is recommended to choose She Gan Ma Huang Decoction. Answer: Choose A from this question	FALSE	NO	NO	NO		YES
40	single-choice question	Internal Medicine of TCM	Male, 55 years old. I usually have a headache, dizziness, and sudden left hemiplegia. My tongue is strong and silent, and my consciousness is not clear. I have a lot of phlegm and constipation, and my tongue is dark red. The coating is yellow and greasy, and my pulse is smooth. The diagnosis is () A. Wind Yang Upward Disturbance Syndrome of Stroke B. Phlegm Heat and Fu Syndrome of Stroke C. Phleg…	C	B	Analysis: Male, 55 years old. I usually have a headache, dizziness, and sudden left hemiplegia. My tongue is strong and speechless, and my consciousness is not clear. I have a lot of phlegm and constipation. My tongue is dark red, the coating is yellow and greasy, and my pulse is smooth. The diagnosis is stroke, phlegm, fire, and blood stasis syndrome. Answer: Choose C from this question	FALSE	NO	NO	NO		YES
41	single-choice question	Internal Medicine of TCM	The following is a single-choice question from the Chinese Comprehensive Ability of Clinical Medicine (TCM) Examination. Please choose the correct answer and provide a correct and reasonable answer analysis Female, 75 years old. Long term illness, incurable for a long time, with symptoms such as dizziness and tinnitus, dry eyes and photophobia, numbness in limbs, impatience and irritability, red …	D	C	Analysis: Female, 75 years old. Long term illness, incurable for a long time, with symptoms such as dizziness and tinnitus, dry eyes and photophobia, numbness in limbs, impatience and irritability, red tongue with little coating, and thin pulse. It is advisable to choose Zuo Gui Yin for treatment. Answer: Choose D from this question	FALSE	NO	NO	NO		YES
42	single-choice question	Internal Medicine of TCM	The following is a single-choice question from the Chinese Comprehensive Ability of Clinical Medicine (TCM) Examination. Please choose the correct answer and provide a correct and reasonable answer analysis Male, 67 years old. A history of chronic bronchitis for 19 years. Symptoms include shallow breathing, opening mouth and lifting shoulders, inability to lie flat, chest tightness and palpitatio…	D	B	Analysis: Male, 67 years old. A history of chronic bronchitis for 19 years. Symptoms include shallow breathing, opening mouth and lifting shoulders, inability to lie flat, chest tightness and palpitations, cold and sweaty appearance, weak waist and knees, short and weak urination, pale purple tongue, and deep and thin pulse. Its diagnosis is lung distension, yang deffciency induced water retentio…	FALSE	NO	NO	NO		YES
43	single-choice question	Internal Medicine of TCM	The following is a single-choice question from the Chinese Comprehensive Ability of Clinical Medicine (TCM) Examination. Please choose the correct answer and provide a correct and reasonable answer analysis Male, 74 years old. A history of benign prostatic hyperplasia for 10 years. For the past month, I have had difficulty urinating, dribbling down, feeling tired and fatigued, feeling chilly and …	D	D	Analysis: Based on the patient's symptoms, it can be determined that their syndrome is urinary obstruction caused by prostate enlargement. In terms of treatment, it is advisable to choose the method of warming and tonifying kidney yang, and promoting the circulation of qi and water. Answer: Choose D from this question	TRUE	YES	NO	NO
44	single-choice question	Internal Medicine of TCM	The following is a single-choice question from the Chinese Comprehensive Ability of Clinical Medicine (TCM) Examination. Please choose the correct answer and provide a correct and reasonable answer analysis Female, 63 years old. Yesterday, I suddenly had a cold and fever, headache, strong and urgent neck and back, severe limb soreness, convulsions, thin and white coating, and tight pulse. Its dia…	D	D	Analysis: Female, 63 years old. Yesterday, I suddenly had a cold and fever, headache, strong and urgent neck and back, severe limb soreness, convulsions, thin and white coating, and tight pulse. Its diagnosis is spasms and pathogenic obstruction of meridians. Answer: Choose D from this question	TRUE	NO	NO	NO
45	single-choice question	Internal Medicine of TCM	The following is a single-choice question from the Chinese Comprehensive Ability of Clinical Medicine (TCM) Examination. Please choose the correct answer and provide a correct and reasonable answer analysis The main principles for treating Phlegm-ffuid retention are () A. Attack and chase B. Infiltrate and benefit C. Warm and transform D. Spread and disperse	C	C	Analysis: The main principle for treating phlegm-ffuid retention is warming. Answer: Choose C from this question	TRUE	NO	NO	NO
46	single-choice question	Internal Medicine of TCM	The following is a single-choice question from the Chinese Comprehensive Ability of Clinical Medicine (TCM) Examination. Please choose the correct answer and provide a correct and reasonable answer analysis Male, 32 years old, enjoys spicy food. Yesterday, after a gathering, he vomited blood and red, mixed with food residue. He had bloating and stuffiness in the epigastric cavity, bad breath and …	B	B	Analysis: According to the patient's symptoms, it is recommended to use Xie Xin Decoction and Shi Hui San for treatment. Answer: Choose B from this question	TRUE	NO	NO	NO
47	single-choice question	Internal Medicine of TCM	The following is a single-choice question from the Chinese Comprehensive Ability of Clinical Medicine (TCM) Examination. Please choose the correct answer and provide a correct and reasonable answer analysis Female, 86 years old, with 26 years history of hypertension and 21 years history of diabetes, taking losartan potassium, acarbose and aspirin for a long time. Symptoms include chest tightness …	B	D	Analysis: female, 86 years old, has 26 years of hypertension history, 21 years of diabetes history, and long-term use of losartan potassium, acarbose, aspirin. Symptoms include chest tightness and shortness of breath, palpitations and pain, increased movement, fatigue and self sweating. The tongue is light and plump, and the pulse is heavy and delayed. The treatment method should be to clear yang…	FALSE	NO	NO	NO		YES
48	single-choice question	Internal Medicine of TCM	The following is a single-choice question from the Chinese Comprehensive Ability of Clinical Medicine (TCM) Examination. Please choose the correct answer and provide a correct and reasonable answer analysis Female, 28 years old. After 4 months of delivery, there is heaviness in the limbs, muscle and joint soreness, poor mobility, inability to descend to the ground, worsening after activity, pale …	A	D	Analysis: Female, 28 years old. After 4 months of delivery, there is heaviness in the limbs, muscle and joint soreness, poor mobility, inability to descend to the ground, worsening after activity, pale and greasy tongue coating, and pulse moistening. It is advisable to use Fang Feng Decoction for treatment. Answer: Choose A from this question	FALSE	NO	NO	NO		YES
49	single-choice question	Internal Medicine of TCM	The following is a single-choice question from the Chinese Comprehensive Ability of Clinical Medicine (TCM) Examination. Please choose the correct answer and provide a correct and reasonable answer analysis Female, 30 years old. For the past three months, there have been loose and lax stools, which persist and recur. After eating, there is stuffiness and discomfort. If there is a slight intake of…	C	C	Analysis: Female, 30 years old. For the past three months, there have been loose and lax stools, which persist and recur. After eating, there is stuffiness and discomfort. If there is a slight intake of oily substances, the frequency of bowel movements increases, the complexion turns pale, the mind is tired and weak, the tongue is pale with white coating, and the pulse is thin and weak. The treat…	TRUE	NO	NO	NO
50	single-choice question	Internal Medicine of TCM	The following is a single-choice question from the Chinese Comprehensive Ability of Clinical Medicine (TCM) Examination. Please choose the correct answer and provide a correct and reasonable answer analysis Female, 32 years old, usually experiences loss of appetite and discomfort in the stomach after eating. I have been experiencing nausea and vomiting for the past week, feeling tired and fatigue…	A	B	Analysis: Female, 32 years old, usually experiences loss of appetite and discomfort in the stomach after eating. I have been experiencing nausea and vomiting for the past week, feeling tired and fatigued, feeling stuffy in the epigastric region, having difficulty with bowel movements, smooth and white tongue coating, and weak pulse. It is advisable to use Li Zhong Decoction with modifications. An…	FALSE	NO	NO	NO		YES
51	single-choice question	Internal Medicine of TCM	The following is a single-choice question from the Chinese Comprehensive Ability of Clinical Medicine (TCM) Examination. Please choose the correct answer and provide a correct and reasonable answer analysis.Female, 43 years old, edema for many years, sometimes mild and sometimes severe, aggravated before menstruation, edema continued for 3 months, swollen face, stinging in the waist, purple and d…	A	C	Analysis: Female, 43 years old, edema for many years, sometimes mild and sometimes severe, aggravated before menstruation, edema continued for 3 months, swollen face, stinging pain in the waist, purple tongue and white moss, thin pulse. It is advisable to use Jisheng Kidney Qi Wan and Zhenwu Soup. Answer: Choose A for this question	FALSE	NO	NO	NO		YES
52	single-choice question	Acupuncture and Moxibustion	The following is a single-choice question from the Chinese Comprehensive Ability of Clinical Medicine (TCM) Examination. Please choose the correct answer and provide a correct and reasonable answer analysis. Located 7 inches below the cubital crease is ( ) A.LU6 B.LI6 C.PC4 D.SJ6	A	C	Answer analysis: 7 inches below the the cubital crease is the LU6. Answer: Choose A for this question	FALSE	NO	NO	NO		YES
53	single-choice question	Acupuncture and Moxibustion	The following is a single-choice question from the Chinese Comprehensive Ability of Clinical Medicine (TCM) Examination. Please choose the correct answer and provide a correct and reasonable answer analysis. The main treatment of the branch ditch and the non-main treatment of the external guan are () A.Tinnitus B.Eyes are swollen and painful C.diarrhea D.constipation	D	D	Analysis: Zhigou acupoint mainly treats constipation, but SJ5 acupoint does not treat constipation. Answer: Choose D for this question	TRUE	NO	NO	NO
54	single-choice question	Acupuncture and Moxibustion	The following is a single-choice question from the Chinese Comprehensive Ability of Clinical Medicine (TCM) Examination. Please choose the correct answer and provide a correct and reasonable answer analysis. Among the following acupoints, acupuncture is not suitable for moxibustion () A. Eyesight B. Qi Sea C. Dazhu D. Baihui	A	A	Analysis: Qing Ming acupoints should be acupuncture rather than moxibustion, Qi Hai, Da Zhui, Bai Hui acupoints can be treated by acupuncture or moxibustion. Answer: Choose A for this question	TRUE	NO	NO	YES
55	single-choice question	Acupuncture and Moxibustion	The following is a single-choice question from the Chinese Comprehensive Ability of Clinical Medicine (TCM) Examination. Please choose the correct answer and provide a correct and reasonable answer analysis. Among the following Shu Xue, all of them can be used to treat urticaria and eczema: A. ST35, KI3 B. GB34,LU5 C. LU5,SP10 D. LU4 ,SP10	C	C	Analysis: LU5 acupoint can be used to treat addiction rash and eczema. Answer: Choose C for this question	TRUE	NO	NO	NO
56	single-choice question	Internal Medicine of TCM	The following is a single-choice question from the Chinese Comprehensive Ability of Clinical Medicine (TCM) Examination. Please choose the correct answer and provide a correct and reasonable answer analysis. Male, 73 years old, with a history of hypertension for 10 years and coronary heart disease for 8 years. 3 weeks ago, I had palpitations due to fright, I didn't sleep a lot, I ate a lot, I did…	B	C	Analysis: Male, 73 years old, with a history of hypertension for 10 years and a history of coronary heart disease for 8 years. 3 weeks ago, I had palpitations due to fright, I didn't sleep a lot, I ate a lot, I didn't eat much, my tongue was pale and white, and my pulse was thin. It is advisable to use Baizi Yangxin Wan. Answer: Choose B for this question	FALSE	NO	NO	NO		YES
57	single-choice question	Internal Medicine of TCM	The following is a single-choice question from the Chinese Comprehensive Ability of Clinical Medicine (TCM) Examination. Please choose the correct answer and provide a correct and reasonable answer analysis. Male, 73 years old, with a history of hypertension for 10 years and coronary heart disease for 8 years. 3 weeks ago, I had palpitations due to fright, I didn't sleep a lot, I ate a lot, I did…	C	D	Analysis: According to the patient's symptoms, it can be judged that he has chest paralysis and cold condensation syndrome. Answer: Choose C for this question	FALSE	NO	NO	NO		YES
58	single-choice question	Internal Medicine of TCM	The following is a single-choice question from the Chinese Comprehensive Ability of Clinical Medicine (TCM) Examination. Please choose the correct answer and provide a correct and reasonable answer analysis. Male, 73 years old, with a history of hypertension for 10 years and coronary heart disease for 8 years. 3 weeks ago, I had palpitations due to fright, I didn't sleep a lot, I ate a lot, I did…	C	D	Analysis: This is a traditional Chinese medicine question, according to the patient's symptoms, it can be judged that he has chest paralysis and cold condensation heart pulse syndrome. Answer: Choose C for this question	FALSE	NO	NO	NO		YES
59	single-choice question	Internal Medicine of TCM	The following is a single-choice question from the Chinese Comprehensive Ability of Clinical Medicine (TCM) Examination. Please choose the correct answer and provide a correct and reasonable answer analysis. Male, 22 years old. Fever for a week, the initial body temperature is about 38 °C, gradually rising to 39.8 °C, chills, strong fever does not go away, cough and shortness of breath, severe pa…	C	B	Analysis: According to the patient's symptoms, the diagnosis is the pulmonary carbuncle ulceration stage. Answer: Choose C for this question	FALSE	NO	NO	NO		YES
60	single-choice question	Internal Medicine of TCM	The following is a single-choice question from the Chinese Comprehensive Ability of Clinical Medicine (TCM) Examination. Please choose the correct answer and provide a correct and reasonable answer analysis. Male, 22 years old. Fever for a week, the initial body temperature is about 38 °C, gradually rising to 39.8 °C, chills, strong fever does not go away, cough and shortness of breath, severe pa…	B	C	Analysis: According to the patient's symptoms, the diagnosis is the pulmonary carbuncle ulceration stage. The principle of treatment is to clear away heat and dissipate knots, detoxify and drain pus to dispel evil spirits, which is the basic principle of treating pulmonary carbuncles. According to different disease stages, corresponding treatment methods are taken. For example, in the early stage…	FALSE	YES	YES	YES		YES
61	single-choice question	Internal Medicine of TCM	The following is a single-choice question from the Chinese Comprehensive Ability of Clinical Medicine (TCM) Examination. Please choose the correct answer and provide a correct and reasonable answer analysis. Male, 22 years old. Fever for a week, the initial body temperature is about 38 °C, gradually rising to 39.8 °C, chills, strong fever does not go away, cough and shortness of breath, severe pa…	A	A	Analysis: Male, 22 years old. Fever for a week, the initial body temperature is about 38 °C, gradually rising to 39.8 °C, chills, strong fever does not go away, cough and shortness of breath, severe pain in the left chest, vomiting a large amount of yellow-green sputum, feeling fishy smell in the throat, dry mouth and throat, red tongue, yellow greasy, pulse number. If after treatment, the patien…	TRUE	NO	NO	NO
62	single-choice question	Internal Medicine of TCM	The following is a single-choice question from the Chinese Comprehensive Ability of Clinical Medicine (TCM) Examination. Please choose the correct answer and provide a correct and reasonable answer analysis. Female, 42 years old. 5 days ago, he had pain in the right flank, traction on the shoulder and back, nausea and vomiting from time to time, and the pain was reduced after taking Chinese and W…	D	A	Analysis: According to the patient's symptoms, the diagnosis is internal injury fever. Answer: Choose D for this question	FALSE	NO	NO	NO		YES
63	single-choice question	Internal Medicine of TCM	The following is a single-choice question from the Chinese Comprehensive Ability of Clinical Medicine (TCM) Examination. Please choose the correct answer and provide a correct and reasonable answer analysis. Female, 42 years old. 5 days ago, he had pain in the right flank, traction on the shoulder and back, nausea and vomiting from time to time, and the pain was reduced after taking Chinese and W…	C	C	Analysis: According to the patient's symptoms, the syndrome is hepatobiliary dampness and heat. Answer: Choose C for this question	TRUE	NO	NO	NO
64	single-choice question	Internal Medicine of TCM	The following is a single-choice question from the Chinese Comprehensive Ability of Clinical Medicine (TCM) Examination. Please choose the correct answer and provide a correct and reasonable answer analysis. Female, 42 years old. 5 days ago, he had pain in the right flank, traction on the shoulder and back, nausea and vomiting from time to time, and the pain was reduced after taking Chinese and W…	C	B	Analysis: According to the patient's symptoms, the syndrome is hepatobiliary dampness and heat. Answer: Choose C for this question	FALSE	NO	NO	NO		YES
65	single-choice question	Internal Medicine of TCM	The following is a single-choice question from the Chinese Comprehensive Ability of Clinical Medicine (TCM) Examination. Please choose the correct answer and provide a correct and reasonable answer analysis. Female, 30 years old. Recently overworked, jaundice appeared 1 week ago. Symptoms include: yellow staining of the body and eyes, bright yellow, poor appetite, fatigue, dry mouth and bitter mo…	A	A	Analysis: According to the patient's symptoms, the pathogenesis is damp heat fumigation, trapping the spleen and stomach, stagnation of the liver and gallbladder, and bile overflow. Answer: Choose A for this question	TRUE	NO	NO	NO
66	single-choice question	Internal Medicine of TCM	The following is a single-choice question from the Chinese Comprehensive Ability of Clinical Medicine (TCM) Examination. Please choose the correct answer and provide a correct and reasonable answer analysis. Female, 30 years old. Recently overworked, jaundice appeared 1 week ago. Symptoms include: yellow staining of the body and eyes, bright yellow, poor appetite, fatigue, dry mouth and bitter mo…	D	D	Analysis: Female, 30 years old. Recently overworked, jaundice appeared 1 week ago. Symptoms include: yellow staining of the body and eyes, bright yellow, poor appetite, fatigue, dry mouth and bitter mouth, abdominal distention, constipation, short urine and yellow redness, poor night sleep, red tongue, greasy yellowishness, and slippery pulse. The treatment method should be to clear away heat and…	TRUE	NO	NO	NO
67	single-choice question	Internal Medicine of TCM	The following is a single-choice question from the Chinese Comprehensive Ability of Clinical Medicine (TCM) Examination. Please choose the correct answer and provide a correct and reasonable answer analysis. Female, 30 years old. Recently overworked, jaundice appeared 1 week ago. Symptoms include: yellow staining of the body and eyes, bright yellow, poor appetite, fatigue, dry mouth and bitter mo…	A	C	Analysis: Female, 30 years old. Recently overworked, jaundice appeared 1 week ago. Symptoms include: yellow staining of the body and eyes, bright yellow, poor appetite, fatigue, dry mouth and bitter mouth, abdominal distention, constipation, short urine and yellow redness, poor night sleep, red tongue, greasy yellowishness, and slippery pulse. It is advisable to choose Yinchen Wuling San. Answer:…	FALSE	NO	NO	NO		YES
68	single-choice question	Acupuncture and Moxibustion	The following is a single-choice question from the Chinese Comprehensive Ability of Clinical Medicine (TCM) Examination. Please choose the correct answer and provide a correct and reasonable answer analysis. Female, 40 years old. Half a year ago, due to nervousness and tiredness, stomach discomfort, vomiting, and then vomiting and heating due to poor mood, vomiting and vomiting in recent days, sw…	B	A	Analysis: Female, 40 years old. Half a year ago, due to nervousness and tiredness, stomach discomfort, vomiting, and then vomiting and heating due to poor mood, vomiting and vomiting recently, swallowing acid and bitter mouth, pale red tongue and thin white moss, pulse. In addition to the selection of corresponding acupuncture points, acupuncture treatment should also focus on the acupuncture poi…	FALSE	NO	NO	NO		YES
69	single-choice question	Acupuncture and Moxibustion	The following is a single-choice question from the Chinese Comprehensive Ability of Clinical Medicine (TCM) Examination. Please choose the correct answer and provide a correct and reasonable answer analysis. Female, 40 years old. Half a year ago, due to nervousness and tiredness, stomach discomfort, vomiting, and then vomiting and heating due to poor mood, vomiting and vomiting in recent days, sw…	B	B	Analysis: Female, 40 years old. Half a year ago, due to nervousness and tiredness, stomach discomfort, vomiting, and then vomiting and heating due to poor mood, vomiting and vomiting recently, swallowing acid and bitter mouth, pale red tongue and thin white moss, pulse. The main points that should be selected are CV6, PC6, ST36. Answer: Choose B for this question	TRUE	NO	NO	NO
70	single-choice question	Acupuncture and Moxibustion	The following is a single-choice question from the Chinese Comprehensive Ability of Clinical Medicine (TCM) Examination. Please choose the correct answer and provide a correct and reasonable answer analysis. Female, 40 years old. Half a year ago, due to nervousness and tiredness, stomach discomfort, vomiting, and then vomiting and heating due to poor mood, vomiting and vomiting in recent days, sw…	B	D	Analysis: According to the information you provided, the symptoms of this female patient are sour swallowing and bitter mouth, pale red tongue, thin white moss, and stringy pulse. Traditional Chinese medicine believes that throat acid is a sign of fire. Therefore, the main points that should be selected are RM17 and SP7. Answer: Choose B for this question	FALSE	YES	YES	NO		YES
71	single-choice question	Acupuncture and Moxibustion	The following is a single-choice question from the Chinese Comprehensive Ability of Clinical Medicine (TCM) Examination. Please choose the correct answer and provide a correct and reasonable answer analysis. Female, 48 years old. He came to the clinic for more than a month because of pain in his right shoulder. Onset is slow, with gradual worsening pain. The pain on the lateral side of the should…	C	B	Analysis: Female, 48 years old. He came to the clinic for more than a month because of pain in his right shoulder. Onset is slow, with gradual worsening pain. The pain on the lateral side of the shoulder is predominant, the soreness is obvious, the abduction of the shoulder joint is difficult, and the exertion is aggravated. The tongue is pale red, the moss is thin and white, and the pulse is thi…	FALSE	NO	NO	NO		YES
72	single-choice question	Acupuncture and Moxibustion	The following is a single-choice question from the Chinese Comprehensive Ability of Clinical Medicine (TCM) Examination. Please choose the correct answer and provide a correct and reasonable answer analysis. Female, 48 years old. He came to the clinic for more than a month because of pain in his right shoulder. Onset is slow, with gradual worsening pain. The pain on the lateral side of the should…	C	C	Analysis: Female, 48 years old. He came to the clinic for more than a month because of pain in his right shoulder. Onset is slow, with gradual worsening pain. The pain on the lateral side of the shoulder is predominant, the soreness is obvious, the abduction of the shoulder joint is difficult, and the exertion is aggravated. The tongue is pale red, the moss is thin and white, and the pulse is thi…	TRUE	NO	NO	NO
73	single-choice question	Acupuncture and Moxibustion	The following is a single-choice question from the Chinese Comprehensive Ability of Clinical Medicine (TCM) Examination. Please choose the correct answer and provide a correct and reasonable answer analysis. Female, 48 years old. He came to the clinic for more than a month because of pain in his right shoulder. Onset is slow, with gradual worsening pain. The pain on the lateral side of the should…	B	D	Analysis: Female, 48 years old. He came to the clinic for more than a month because of pain in his right shoulder. Onset is slow, with gradual worsening pain. The pain on the lateral side of the shoulder is predominant, the soreness is obvious, the abduction of the shoulder joint is difficult, and the exertion is aggravated. The tongue is pale red, the moss is thin and white, and the pulse is thi…	FALSE	NO	NO	NO		YES
74	single-choice question	Humanistic Spirit of Medicine	The following is a single-choice question from the Chinese Comprehensive Ability of Clinical Medicine (TCM) Examination. Please choose the correct answer and provide a correct and reasonable answer analysis. The medical profession is a medical community that is accountable to the commitment expected of the public, and the following statements are incorrect: A. The medical profession does not requ…	C	A	Analysis: The medical profession needs to pass systematic training, require self-discipline of the professional community, and maintain professional integrity through a strict access system. Answer: Choose C for this question	FALSE	NO	NO	NO	YES
75	single-choice question	Humanistic Spirit of Medicine	The following is a single-choice question from the Chinese Comprehensive Ability of Clinical Medicine (TCM) Examination. Please choose the correct answer and provide a correct and reasonable answer analysis. What is not part of the patient's obligation in the doctor-patient relationship is () A. The patient has the obligation to truthfully inform the doctor about the condition B. The patient has …	D	D	Analysis: What is not part of the patient's obligation in the doctor-patient relationship is that the patient has an obligation to follow even unnecessary treatment. Answer: Choose D for this question	TRUE	NO	NO	NO
76	single-choice question	Humanistic Spirit of Medicine	The following is a single-choice question from the Chinese Comprehensive Ability of Clinical Medicine (TCM) Examination. Please choose the correct answer and provide a correct and reasonable answer analysis. Due to the inequality of medical knowledge between doctors and patients, patients are in a vulnerable position and rely on doctors. Patients entrust their health and life to medical staff, so…	B	B	Analysis: This doctor-patient relationship is called trust relationship. Answer: This question is B	TRUE	NO	NO	NO
77	single-choice question	Humanistic Spirit of Medicine	The following is a single-choice question from the Chinese Comprehensive Ability of Clinical Medicine (TCM) Examination. Please choose the correct answer and provide a correct and reasonable answer analysis. Male, 35 years old. Because the radial shaft fracture was treated with plate internal fixation, the plate broke 3 months after operation, and the patient asked the hospital for compensation. …	D	D	Analysis: The improper treatment of the hospital is to inform the patient that it is a steel plate quality problem, and the hospital is not responsible for handling it. The correct approach should be to listen to the patient's complaints and explain and appease them; Understand the relevant situation of steel plate fracture in detail, and analyze the causes of steel plate fracture; Clarify respon…	TRUE	YES	YES	NO
78	single-choice question	Humanistic Spirit of Medicine	The following is a single-choice question from the Chinese Comprehensive Ability of Clinical Medicine (TCM) Examination. Please choose the correct answer and provide a correct and reasonable answer analysis. It is an important clinical ethical principle to keep secrets for patients, and it is the obligation of doctors to protect patients' medical information. The following behaviors of doctors ca…	D	D	Analysis: Keeping secrets for patients is an important clinical ethical principle, and it is the doctor's obligation to protect the patient's medical information. The following doctors' behavior can be ethically defended by providing them with authorized anonymous medical research information at the request of their peers. Answer: This question is D	TRUE	NO	YES	NO
79	single-choice question	Humanistic Spirit of Medicine	The following is a single-choice question from the Chinese Comprehensive Ability of Clinical Medicine (TCM) Examination. Please choose the correct answer and provide a correct and reasonable answer analysis. What is incorrect about the ethics of informed consent principle is () A. The ethical requirements of informed consent should fully respect the principle of patient autonomy B. Informed conse…	B	B	Analysis: The ethical requirements of informed consent should fully respect the principle of patient autonomy, the expected benefits and possible risks of surgery should be clarified in the informed consent form, and informed consent should be a process of frank communication between doctors and patients. Answer: This question is B	TRUE	NO	NO	NO
80	single-choice question	Humanistic Spirit of Medicine	The following is a single-choice question from the Chinese Comprehensive Ability of Clinical Medicine (TCM) Examination. Please choose the correct answer and provide a correct and reasonable answer analysis. According to the ethical principles of clinical medical trial design, the following statements are correct () A. Experimental design should benefit both subjects and Society B. Experimental d…	A	C	Analysis: According to the ethical principles of clinical medical trial design, the correct description is that the trial design should benefit both subjects and society. The benefit risk ratio of clinical trial design should be reasonable, and it is also correct for subjects who are unwilling to continue the trial to give clear reasons before allowing them to withdraw from the trial. Answer: Thi…	FALSE	NO	NO	NO	YES	YES
81	single-choice question	Humanistic Spirit of Medicine	The following is a single-choice question from the Chinese Comprehensive Ability of Clinical Medicine (TCM) Examination. Please choose the correct answer and provide a correct and reasonable answer analysis. Female, 23 years old. After 7 weeks of pregnancy, she went to a clinic to ask for artificial abortion. The clinic arranged to employ Wang to perform the operation for him. Due to improper ope…	D	D	Analysis: According to the relevant provisions of China's "doctor law", Mr. Wang should be investigated for criminal responsibility according to law. Answer: This question is D	TRUE	NO	NO	NO
82	single-choice question	Basic Theory of TCM	The following is a single-choice question from the Chinese Comprehensive Ability of Clinical Medicine (TCM) Examination. Please choose the correct answer and provide a correct and reasonable answer analysis. Reflecting the 'Wind moves' () A. The location of the disease is uncertain. B. It has the characteristics of ascending and dispersing. C. It often hurts people with other pathogenic factors. …	A	A	Analysis: The wind nature of good behavior refers to the characteristics that the pathogenic wind pathogen has the disease position shifting and has no fixed position. For example, there is no definite place for the pain of the wandering joint, which is called 'Wind impediment' or 'Migratory impediment'; Pruritus of the skin and shifting of the itching position have no definite place, which is ca…	TRUE	YES	YES	YES
83	single-choice question	Basic Theory of TCM	The following is a single choice question about the comprehensive ability of clinical medicine (traditional Chinese Medicine) test in China. Please choose the correct answer and generate a correct and reasonable answer analysis. What shows that 'Wind is the leading cause of diseases' is () A. The location of the disease is uncertain. B. It has the characteristics of ascending and dispersing. C. I…	B	C	Analysis: Wind pathogen is the first of the six pathogenic factors in the theory of traditional Chinese medicine. It has the characteristics of ascending and dispersing, and can cause various diseases. Therefore, it is characterized by ascending and dispersing that the wind is the root of all diseases. Answer: This question is B	FALSE	YES	YES	NO		YES
84	single-choice question	Basic Theory of TCM	The following is a single-choice question from the Chinese Comprehensive Ability of Clinical Medicine (TCM) Examination. Please choose the correct answer and provide a correct and reasonable answer analysis. It is pointed out in Suwen, on the biography of specimen diseases that "the person who is ill first and then full in middle" should () A. Treat the tip B. Treat the root C. Treat both the tip…	A	A	Analysis: Suwen points out that "those who are ill first and then born with middle fullness" should treat their tip. Answer: This question is A	TRUE	NO	NO	NO
85	single-choice question	Basic Theory of TCM	The following is a single-choice question from the Chinese Comprehensive Ability of Clinical Medicine (TCM) Examination. Please choose the correct answer and provide a correct and reasonable answer analysis. It is pointed out in Suwen, on the transmission of diseases in specimens that "the person who is hot first and then full in life" should () A. Treat the tip B. Treat the root C. Treat both th…	A	A	Analysis: Suwen points out that "those who are hot first and then full in life" should be treated the tip. Answer: This question is A	TRUE	NO	NO	NO
86	single-choice question	Diagnostics of TCM	The following is a single-choice question from the Chinese Comprehensive Ability of Clinical Medicine (TCM) Examination. Please choose the correct answer and provide a correct and reasonable answer analysis。 The patient with spleen deficiency and dampness can see the complexion () A.Pale yellow complexion B.Pale yellow and floating C. Pale yellow in the green D. Pale dull as smoke	C	B	Analysis: The patient with spleen deficiency and dampness can see yellow and green complexion. The answer is C	FALSE	NO	NO	NO		YES
87	single-choice question	Diagnostics of TCM	The following is a single-choice question from the Chinese Comprehensive Ability of Clinical Medicine (TCM) Examination. Please choose the correct answer and provide a correct and reasonable answer analysis。 Patients with cold dampness trapped spleen can see the facial color () A. Pale yellow complexion B. pale yellow and floating C. yellow complexion with green color D. His face was dull and smo…	C	D	Analysis: The patient with cold dampness trapped spleen can see yellow in the face. The answer is C	FALSE	NO	NO	NO		YES
88	single-choice question	Diagnostics of TCM	The following is a single-choice question from the Chinese Comprehensive Ability of Clinical Medicine (TCM) Examination. Please choose the correct answer and provide a correct and reasonable answer analysis。 Amenorrhea infertility, hair loss teeth shaking, tinnitus amnesia, the diagnosis is () A. Kidney essence deficiency syndrome B. Kidney Yang deficiency syndrome C. kidney Yin deficiency syndro…	A	A	Analysis: Amenorrhea infertility, hair loss teeth shaking, tinnitus forgetfulness, its diagnosis is kidney essence deficiency syndrome. Answer: This is choice A	TRUE	NO	NO	NO
89	single-choice question	Diagnostics of TCM	The following is a single-choice question from the Chinese Comprehensive Ability of Clinical Medicine (TCM) Examination. Please choose the correct answer and provide a correct and reasonable answer analysis。 Amenorrhea infertility, vertigo tinnitus, hot flushes night sweats, the diagnosis is () A. Kidney essence deficiency syndrome B. Kidney Yang deficiency syndrome C. kidney Yin deficiency syndr…	C	C	Analysis: Amenorrhea infertility, vertigo tinnitus, hot flash night sweats, the diagnosis is kidney Yin deficiency syndrome. The answer is C	TRUE	NO	NO	NO
90	single-choice question	Pharmacology of TCM	The following is a single-choice question from the Chinese Comprehensive Ability of Clinical Medicine (TCM) Examination. Please choose the correct answer and provide a correct and reasonable answer analysis。 The Common effect of Leonurus and Achyranthes () A. Activating blood and regulating menstruation, dissolving water B. channeling milk through menstruation, diuresis and relieving drenching C.…	B	A	Analysis: Motherwort and achyranthes heterophyllum have the common effect of milk through menstruation, diuretic through drench. Answer: This is choice B	FALSE	NO	NO	NO		YES
91	single-choice question	Pharmacology of TCM	The following is a single-choice question from the Chinese Comprehensive Ability of Clinical Medicine (TCM) Examination. Please choose the correct answer and provide a correct and reasonable answer analysis。 Mutong and Wang do not have the same effect () A. Activating blood and regulating menstruation, dissolving water B. channeling milk through menstruation, diuresis and relieving drenching C. A…	B	B	"Analysis: Mutong, Wang do not have the common effect of line is to pass through the milk, diuretic through the shower. Answer: This is choice B.	TRUE	NO	NO	NO
92	single-choice question	Pharmacology of TCM	The following is a single-choice question from the Chinese Comprehensive Ability of Clinical Medicine (TCM) Examination. Please choose the correct answer and provide a correct and reasonable answer analysis。 Can not only relieve pain, but also warm stop vomiting is () A. Wood fragrance B. Agarwood C. Incense and D. Aconitum	B	B	Analysis: It can not only relieve pain, but also warm and stop vomiting is agarwood. Answer: This is choice B.	TRUE	NO	NO	NO
93	single-choice question	Pharmacology of TCM	The following is a single-choice question from the Chinese Comprehensive Ability of Clinical Medicine (TCM) Examination. Please choose the correct answer and provide a correct and reasonable answer analysis。 Can not only line qi pain, but also warm kidney to dispel cold is () A. Wood fragrance B. Agarwood C. Incense and D. Aconitum	B	D	Analysis: It is agarwood that can not only relieve pain but also warm kidney and dispel cold. Answer: This is choice B.	FALSE	NO	NO	NO		YES
94	single-choice question	Formulas of TCM	The following is a single-choice question from the Chinese Comprehensive Ability of Clinical Medicine (TCM) Examination. Please choose the correct answer and provide a correct and reasonable answer analysis。 What is contained in Dachaihu Decoction and what is not in Xiaochaihu Decoction () A. Peony B. Pinellia C. Ginger D. licorice	A	A	Analysis: Large bupleurum Decoction contains and small bupleurum Decoction does not contain peony. Answer: This is choice A.	TRUE	NO	NO	NO
95	single-choice question	Formulas of TCM	The following is a single-choice question from the Chinese Comprehensive Ability of Clinical Medicine (TCM) Examination. Please choose the correct answer and provide a correct and reasonable answer analysis。 Xiaoxianxiong Decoction contains and Daxianxiong Decoction does not contain () A. Peony B. Pinellia C. Ginger D. licorice	B	B	Analysis: Small breast Decoction contains but large breast Decoction does not contain pinellia. Answer: This is choice B.	TRUE	NO	NO	NO
96	single-choice question	Formulas of TCM	The following is a single-choice question from the Chinese Comprehensive Ability of Clinical Medicine (TCM) Examination. Please choose the correct answer and provide a correct and reasonable answer analysis。 The etiology and pathogenesis of treating syndrome of Qinhao Biejia decoction are () A. Yin blood deficiency, wind evil spread in heat B. liver and kidney Yin deficiency, weak fire internal i…	C	C	Analysis: The etiology and pathogenesis of treating syndrome of Artemisinin Biejia decoction is the late stage of febrile disease, the syndrome of evil and Yin. Night heat cold, heat retreat without sweat, red tongue less moss, pulse fine number. Clinically, it is often used to treat fever of unknown cause, low fever in the convalescence period of various infectious diseases, chronic pyelonephrit…	TRUE	YES	YES	YES
97	single-choice question	Formulas of TCM	The following is a single-choice question from the Chinese Comprehensive Ability of Clinical Medicine (TCM) Examination. Please choose the correct answer and provide a correct and reasonable answer analysis。 The etiology and pathogenesis of treating syndromes of Gentiana Biejia powder are () A. Yin blood deficiency, wind evil spread in heat B. liver and kidney Yin deficiency, weak fire internal i…	B	A	Analysis: The etiology and pathogenesis of Gentiana Biejia powder is Yin deficiency of liver and kidney and internal disturbance of deficient fire. The clinical manifestations are dizziness, tinnitus and deafness, waist and knee tenderness, five upset heat, dry mouth and thirst. Gentianbiejia powder has the effect of nourishing Yin and clearing heat, tonifying kidney and filling essence. It is su…	FALSE	YES	YES	YES		YES
98	single-choice question	Internal Medicine of TCM	The following is a single-choice question from the Chinese Comprehensive Ability of Clinical Medicine (TCM) Examination. Please choose the correct answer and provide a correct and reasonable answer analysis。 Male, 27 years old. In the middle of winter, when I go out to work, I have sudden asthma, shortness of breath, cough, thin white sputum, cold headache, pale red tongue and thin white fur, and…	D	D	"Analysis: Male, 27 years old. In the middle of winter, when I go out to work, I have sudden asthma, shortness of breath, cough, thin white sputum, cold headache, pale red tongue and thin white fur, and tight pulse. Ephedra decoction should be used for treatment. Answer: This is D."	TRUE	NO	NO	NO
99	single-choice question	Internal Medicine of TCM	The following is a single-choice question from the Chinese Comprehensive Ability of Clinical Medicine (TCM) Examination. Please choose the correct answer and provide a correct and reasonable answer analysis。 Male, 42 years old, midsummer, long blowing air conditioning, sudden asthma, phlegm, thick yellow, cold body heat, no sweat, tongue red fur yellow, pulse floating and number. cure Use () A. M…	B	A	Analysis: According to the patient's symptoms, it is considered that the upper respiratory tract infection caused by cold. This situation is generally more common viral infection, but can not completely exclude the possibility of bacterial infection. Sangju drink should be selected for treatment. Answer: B"	FALSE	YES	YES	NO		YES
100	single-choice question	Internal Medicine of TCM	The following is a single-choice question from the Chinese Comprehensive Ability of Clinical Medicine (TCM) Examination. Please choose the correct answer and provide a correct and reasonable answer analysis。 Dementia is a deficiency of the sea of pulp, treatment should be selected () A. Qifu Yin B. Zuogui Wan C. Huanhao Dan D. Bazhen Decoction	A	A	Analysis: Dementia belongs to the deficiency of the pulp sea, the treatment should choose seven blessings drink. Answer: This is choice A.	TRUE	NO	NO	NO
101	single-choice question	Internal Medicine of TCM	The following is a single-choice question from the Chinese Comprehensive Ability of Clinical Medicine (TCM) Examination. Please choose the correct answer and provide a correct and reasonable answer analysis. Dementia belongs to the deficiency of the spleen and kidney pattern. The treatment should choose: A. Qifu Decoction (Qifu Yin) B. Zuo Gui Wan (Zuo Gui Wan) C. Huanshao Pellet (Huanshao Dan) D…	C	C	Analysis: For dementia attributed to the deficiency of the spleen and kidney pattern, the treatment tends to Huanshao Pellet. Answer: The correct option for this question is C.	TRUE	NO	NO	NO
102	single-choice question	Acupuncture and Moxibustion	The following is a single-choice question from the Chinese Comprehensive Ability of Clinical Medicine (TCM) Examination. Please choose the correct answer and provide a correct and reasonable answer analysis Select the acupuncture points Ashi point, local meridian points, Yinlingquan(SP9), and Zusanli(ST36) for the treatment of the following condition: A. Migratory impediment B. Fixed impediment C…	C	B	Answer Explanation: : the condition treated by the Ashi point, localized meridian points, Yinlingquan(SP9), and Zusanli(ST36) is painful impediment. Answer: choose C for this question"	FALSE	NO	NO	NO		YES
103	single-choice question	Acupuncture and Moxibustion	The following is a single-choice question from the Chinese Comprehensive Ability of Clinical Medicine (TCM) Examination. Please choose the correct answer and provide a correct and reasonable answer analysis. The disease condition treated by selecting Ashi point, local meridian points, Spleen Transverse Meridian Point and the Sea of Blood is ( ) A. Migratory impediment B. Fixed impediment C. Painf…	A	A	Answer Analysis: The acupuncture points Ashi, local meridian points, Spleen Transverse Meridian Point, and the Sea of Blood are used to treat Migratory impediment. The correct answer is A. Migratory impediment.	TRUE	NO	NO	NO
104	single-choice question	Acupuncture and Moxibustion	The following is a single-choice question from the Chinese Comprehensive Ability of Clinical Medicine (TCM) Examination. Please choose the correct answer and provide a correct and reasonable answer analysis. Of the following acupuncture points, both of them are located 2 inches away from the anterior midline ( ) A. Kufang(ST14), Zhangmen(LR13) B. Shenshu(BL23), Tianzhu(BL10) C. Zhishi(BL52), Zhib…	C	D	Of the following acupuncture points, both of them are located 2 inches away from the anterior midline are Zhishi(BL52), Zhibian(BL54). The correct answer is C.	FALSE	NO	NO	NO		YES
105	single-choice question	Acupuncture and Moxibustion	The following is a single-choice question from the Chinese Comprehensive Ability of Clinical Medicine (TCM) Examination. Please choose the correct answer and provide a correct and reasonable answer analysis. Of the following acupuncture points, both of them are located 3 inches away from the anterior midline ( ) A. Kufang(ST14), Zhangmen(LR13) B. Shenshu(BL23), Tianzhu(BL10) C. Zhishi(BL52), Zhib…	C	C	Of the following acupuncture points, both of them are located 3 inches away from the anterior midline are Zhishi(BL52), Zhibian(BL54). The correct answer is C.	TRUE	NO	NO	NO
106	multiple-choice question	Basic Theory of TCM	The following is a multiple-choice question from the Chinese Comprehensive Ability of Clinical Medicine (TCM) Examination. For each sub-question, there are four options labeled A, B, C, and D, among which at least two meet the requirements of the question. Please choose the correct answers and generate a correct and reasonable answer analysis. The following narratives reflect that the human body …	A	ABCD	Answer Analysis: Of the following accounts, the view reflecting that the human body is an organic whole is the the comcept of the oneness of the five organs. Answer: The correct answer is A	FALSE	NO	NO	NO		YES
107	multiple-choice question	Basic Theory of TCM	The following is a multiple-choice question from the Chinese Comprehensive Ability of Clinical Medicine (TCM) Examination. For each sub-question, there are four options labeled A, B, C, and D, among which at least two meet the requirements of the question. Please choose the correct answers and generate a correct and reasonable answer analysis. Related to the theory of yin-yang interdependency is …	B	AB	Ans: Related to the theory of yin-yang interdependency is seeking yang from yin. Answer: The correct answer is B	FALSE	NO	NO	NO		YES
108	multiple-choice question	Basic Theory of TCM	The following is a multiple-choice question from the Chinese Comprehensive Ability of Clinical Medicine (TCM) Examination. For each sub-question, there are four options labeled A, B, C, and D, among which at least two meet the requirements of the question. A malfunction of the spleen's ascending function is ( ) A. Nausea and vomiting B. Abdominal swelling C. Prolonged diarrhea and prolapse D. Sub…	C	BC	Answer Analysis: A malfunction of the spleen's ascending function is prolonged diarrhea and prolapse. Answer: The correct answer is C	FALSE	NO	NO	NO		YES
109	multiple-choice question	Basic Theory of TCM	The following is a multiple-choice question from the Chinese Comprehensive Ability of Clinical Medicine (TCM) Examination. For each sub-question, there are four options labeled A, B, C, and D, among which at least two meet the requirements of the question. The relationship between the lungs and the kidneys is manifested as ( ) A. Promoting blood movement B. Respiratory movement C. Participating i…	D	BCD	Answer Analysis: The relationship between the lung and the kidney is mainly reflected in the synergy and dependence of water and fluid metabolism and respiratory movement. The lung is the upper source of water, regulating the waterways; the kidney is a water organ, the lung and kidney synergistic effect, coupled with the spleen on the transportation of water, to ensure the normal distribution and…	FALSE	YES	YES	YES	YES	YES
110	multiple-choice question	Basic Theory of TCM	The following is a multiple-choice question from the Chinese Comprehensive Ability of Clinical Medicine (TCM) Examination. For each sub-question, there are four options labeled A, B, C, and D, among which at least two meet the requirements of the question. About ying-nutrient qi, the correct is ( ) A. the nature of plagiarism and slippery B. sprinkled in the six fu-organs C. generated by the esse…	C	BCD	Answer Analysis: ying-nutrient qi refers to the essence that runs in the hemp pipe, is born in the water and food, originates from the spleen and stomach, and comes out of the middle jiao, which is soft and smooth in nature, and has the function of generating blood and nourishing the whole body. Ying-nutrient qi runs from the middle jiao up to the The lung meridian of hand-Taiyin, and then throug…	FALSE	YES	YES	YES		YES
111	multiple-choice question	Basic Theory of TCM	The following is a multiple-choice question from the Chinese Comprehensive Ability of Clinical Medicine (TCM) Examination. For each sub-question, there are four options labeled A, B, C, and D, among which at least two meet the requirements of the question. The following statement about the twelve divergent collaterals is correct ( ) A. There is no fixed relationship with the internal organs B. Th…	BC	ABCD	Answer Analysis: Twelve divergent collaterals are branches of the twelve meridians, and have a fixed relationship with the zang-fu, so the A option is wrong. Twelve divergent collaterals have both luo-connecting points and corresponding disease, so the B option is correct. Twelve divergent collaterals from the limbs below the elbow and knee joints, so option C is correct. The meridians, rather th…	FALSE	YES	YES	YES		YES
112	multiple-choice question	Basic Theory of TCM	The following is a multiple-choice question from the Chinese Comprehensive Ability of Clinical Medicine (TCM) Examination. For each sub-question, there are four options labeled A, B, C, and D, among which at least two meet the requirements of the question. According to "Su Wen - Wu Zang Generation", "eating too much sweetness" can lead to ( ) A. pain in bones and joints B. obesity C. dryness of m…	B	AD	Answer Analysis: According to "Plain Questions - Five Zang Generation", "eating too much sweet food" can lead to obesity. Answer: B	FALSE	NO	NO	NO		YES
113	multiple-choice question	Basic Theory of TCM	The following is a multiple-choice question from the Chinese Comprehensive Ability of Clinical Medicine (TCM) Examination. For each sub-question, there are four options labeled A, B, C, and D, among which at least two meet the requirements of the question. The following about "internal dryness" statement, the correct is ( ) A. The onset of the disease is mostly in the autumn B. Mostly due to malf…	A	BCD	Answer Analysis: Internal dryness is a TCM term to refer to the lack of fluid in the body, resulting in dryness. The onset of is more in the fall, because the autumn climate is dry, easy to hurt the body's yin; more due to the malfunction of internal organs, fluid deficiency, such as liver qi stagnation, spleen deficiency with dampness, etc.; more in the lungs, the stomach and the large intestine…	FALSE	YES	YES	YES	YES	YES
114	multiple-choice question	Basic Theory of TCM	The following is a multiple-choice question from the Chinese Comprehensive Ability of Clinical Medicine (TCM) Examination. For each sub-question, there are four options labeled A, B, C, and D, among which at least two meet the requirements of the question. The following is correct in the description of the seven emotions that cause disease and directly injure internal organs ( ) A. first affect t…	A	ABCD	Answer Analysis: The seven emotions causing diseases refer to the seven human emotions (joy, anger, worry, thoughts, grief, fear, and shock) that are too intense, leading to the dysfunction of internal organs and causing diseases. Among them, the first impact on the heart and soul, because the heart is the master of bright spirit, is the master of the body's spiritual activities; second, the numb…	FALSE	YES	YES	YES	YES	YES
115	multiple-choice question	Basic Theory of TCM	The following is a multiple-choice question from the Chinese Comprehensive Ability of Clinical Medicine (TCM) Examination. For each sub-question, there are four options labeled A, B, C, and D, among which at least two meet the requirements of the question. Of the following, the one that belongs to the treatment of yang deficiency is () A. treating yang for yin patterns B. seeking yang from yin C.…	D	ABC	Answer Analysis: Yang deficiency treatment is mainly through the supplementation of yang to achieve the purpose of treatment. A option "treating yang for yin patterns" refers to the yin deficiency-induced internal heat patterns and other patterns, and should use the method of nourishing yin to reduce the fire to treat; B option " seeking yang from yin" refers to the balance of yin and yang throug…	FALSE	YES	YES	YES		YES
116	multiple-choice question	Diagnostics of TCM	The following is a multiple-choice question from the Chinese Comprehensive Ability of Clinical Medicine (TCM) Examination. For each sub-question, there are four options labeled A, B, C, and D, among which at least two meet the requirements of the question. Of the following, a hypothermia can result from A. Qi deficiency B. Fluid retention C. Yin deficiency D. Qi stagnation	ABCD	ACD	Answer Analysis: Low-grade fever is defined as a body temperature that is slightly above the normal range but below 38℃. In TCM theory, low-grade fever can be caused by qi deficiency, fluid retention, yin deficiency and qi stagnation. Qi deficiency" refers to the deficiency of qi and blood in the human body, resulting in reduced body functions and symptoms of low-grade fever; "Fluid retention" re…	FALSE	YES	YES	YES		YES
117	multiple-choice question	Diagnostics of TCM	The following is a multiple-choice question from the Chinese Comprehensive Ability of Clinical Medicine (TCM) Examination. For each sub-question, there are four options labeled A, B, C, and D, among which at least two meet the requirements of the question. The following pulse phenomena belong to the physiological variation of the pulse () A. Six yin pulse B. Deep pulse in obese people C. Floating…	ABC	ABCD	Answer Analysis: Physiological variation of the pulse refers to the normal physiological state of the human body or some special state of the pulse changes. option A. "six yin pulse" is unique to TCM, a pulse, belong to the normal physiological phenomenon; option B "obese people appear to be deep pulse" is because of the obese body heavier moisture, resulting in the pulse sinking, is a normal phy…	FALSE	YES	YES	YES		YES
118	multiple-choice question	Diagnostics of TCM	The following is a multiple-choice question from the Chinese Comprehensive Ability of Clinical Medicine (TCM) Examination. For each sub-question, there are four options labeled A, B, C, and D, among which at least two meet the requirements of the question. The pulse signs that can be seen in a deficiency pattern are () A. fine pulse B. arterial pulsation C. tympanic pulse D. racing pulse	AD	ACD	Answer Analysis: Pulse condition is one of the important basis for diagnosis in TCM, which can be seen in the pulse of deficiency pattern, including fine pulse, arterial pulse and racing pulse. A option "fine pulse" refers to the pulse is weak and feeble, common in qi deficiency, blood deficiency and other deficiency; B option "arterial pulsation" refers to the pulse is strong and long, common in…	FALSE	YES	YES	YES	YES	YES
119	multiple-choice question	Diagnostics of TCM	The following is a multiple-choice question from the Chinese Comprehensive Ability of Clinical Medicine (TCM) Examination. For each sub-question, there are four options labeled A, B, C, and D, among which at least two meet the requirements of the question. The following options can lead to a stiff tongue () A. Cold congealing the sinews B. Heat entering the pericardium C. Wind phlegm entering the…	ABCD	BCD	Answer Analysis: Stiff tongue is a symptom of stiffness and inflexible movement of the tongue. In TCM, the main causes of tongue stiffness include cold congealing the sinews, heat entering the pericardium, wind phlegm entering the meridians, exuberant heat damaging fluids. Option A: "Cold congealing the sinews" refers to the invasion of the tendons and veins by cold, resulting in poor qi and bloo…	FALSE	YES	YES	YES		YES
120	multiple-choice question	Diagnostics of TCM	The following is a multiple-choice question from the Chinese Comprehensive Ability of Clinical Medicine (TCM) Examination. For each sub-question, there are four options labeled A, B, C, and D, among which at least two meet the requirements of the question. The following are characteristics of "stomach reflux": () A. Eating in the morning and vomiting in the evening B. Eating in the evening and vo…	ABC	AB	Analysis: Stomach reflux is a symptom in which stomach contents flow back into the esophagus, causing discomfort. In TCM, stomach reflux is characterized by eating in the morning and vomiting in the evening, eating in the evening and vomiting next morning, and vomiting immediately after eating. Option A, "Eating in the morning and vomiting in the evening", refers to the nausea and vomiting in the…	FALSE	YES	YES	YES		YES
121	multiple-choice question	Diagnostics of TCM	The following is a multiple-choice question from the Chinese Comprehensive Ability of Clinical Medicine (TCM) Examination. For each sub-question, there are four options labeled A, B, C, and D, among which at least two meet the requirements of the question. Please choose the correct answers and generate a correct and reasonable answer analysis The following is () A. Aversion to cold and fever, hea…	A	ACD	Analysis: The same disease in the exterior means that the surface syndrome and the inside syndrome appear in the same period, and there are three common situations: first, the initial disease is to see the surface syndrome and see the inside syndrome. The second is the onset of only superficial syndrome, later due to the pathogenic factor into the inside and see the inside syndrome, but the surfa…	FALSE	YES	YES	NO	YES	YES
122	multiple-choice question	Diagnostics of TCM	The following is a multiple-choice question from the Chinese Comprehensive Ability of Clinical Medicine (TCM) Examination. For each sub-question, there are four options labeled A, B, C, and D, among which at least two meet the requirements of the question. Please choose the correct answers and generate a correct and reasonable answer analysis Patients with high fever and thirst, more than the nex…	D	AC	Analysis: Patients with high heat and thirst, more than the next benefit, tongue red fur yellow pulse number, due to improper treatment, suddenly appear cold sweat, limbs cold, pale face, pulse fine want to be absolutely belong to real heat false cold. The answer is D	FALSE	NO	NO	NO		YES
123	multiple-choice question	Diagnostics of TCM	The following is a multiple-choice question from the Chinese Comprehensive Ability of Clinical Medicine (TCM) Examination. For each sub-question, there are four options labeled A, B, C, and D, among which at least two meet the requirements of the question. Please choose the correct answers and generate a correct and reasonable answer analysis The following options belong to the manifestation of l…	A	ABCD	Analysis: The performance of liver and kidney Yin deficiency has dizziness, tinnitus forgetfulness, insomnia and dreams, less menstruation and so on. Answer: This is choice A.	FALSE	NO	NO	NO	YES	YES
124	multiple-choice question	Diagnostics of TCM	The following is a multiple-choice question from the Chinese Comprehensive Ability of Clinical Medicine (TCM) Examination. For each sub-question, there are four options labeled A, B, C, and D, among which at least two meet the requirements of the question. Please choose the correct answers and generate a correct and reasonable answer analysis Stomach Yin deficiency syndrome and stomach fire incan…	A	AB	Analysis: Stomach Yin deficiency syndrome and stomach fire burning syndrome can be seen in the manifestations of dry mouth and lips, noisy, retching, diet reduction, swallowing adverse, chest and diaphragm discomfort after food, dry stool, red tongue center dry, less moss or tongue light, dry, thin pulse. Answer: This is choice A.	FALSE	YES	YES	NO		YES
125	multiple-choice question	Diagnostics of TCM	The following is a multiple-choice question from the Chinese Comprehensive Ability of Clinical Medicine (TCM) Examination. For each sub-question, there are four options labeled A, B, C, and D, among which at least two meet the requirements of the question. Please choose the correct answers and generate a correct and reasonable answer analysis Among the following options, can be seen in the spleen…	A	ABCD	"Analysis: spleen does not regulate the blood symptoms are blood stool, urine blood, lack of energy, menstrual disorder, weak tongue, thin pulse and so on. Answer: This is choice A.	FALSE	YES	YES	NO	YES	YES
126	multiple-choice question	Pharmacology of TCM	The following is a multiple-choice question from the Chinese Comprehensive Ability of Clinical Medicine (TCM) Examination. For each sub-question, there are four options labeled A, B, C, and D, among which at least two meet the requirements of the question. Please choose the correct answers and generate a correct and reasonable answer analysis The following drugs that should not be used with licor…	A	ABD	"Liquorice and Beijing Euphorbia used together will lead to abnormal drug metabolism and increase toxic side effects. Answer: This is choice A.	FALSE	YES	YES	NO		YES
127	multiple-choice question	Pharmacology of TCM	The following is a multiple-choice question from the Chinese Comprehensive Ability of Clinical Medicine (TCM) Examination. For each sub-question, there are four options labeled A, B, C, and D, among which at least two meet the requirements of the question. Please choose the correct answers and generate a correct and reasonable answer analysis Treatment of lung carbuncle, commonly used drugs are (…	ABC	ACD	Answer: This is A, B, C Analysis: Treatment of lung carbuncle, commonly used drugs are reed root, big blood vine and houttuynia. It has the function of clearing heat and detoxifying, moistening lung and relieving cough. Big blood rattan can clear heat and detoxify, reduce swelling and pain; Houttuynia has the function of clearing heat, detoxifying, antibacterial and anti-inflammatory. Although co…	FALSE	YES	YES	YES		YES
128	multiple-choice question	Pharmacology of TCM	The following is a multiple-choice question from the Chinese Comprehensive Ability of Clinical Medicine (TCM) Examination. For each sub-question, there are four options labeled A, B, C, and D, among which at least two meet the requirements of the question. Please choose the correct answers and generate a correct and reasonable answer analysis Drugs that both reduce water and strengthen the spleen…	D	BCD	"The answer is D Analysis: Baizhu has the effect of invigorating spleen and diuresis, which can promote digestion and absorption and improve the function of spleen and stomach. The main function of astragalus is to replenish qi, and Acanthus peel and Tuckahoe are mainly used for reducing swelling. Therefore, Baizhu is a medicine that both improves water and strengthens the spleen.	FALSE	YES	YES	YES		YES
129	multiple-choice question	Pharmacology of TCM	The following is a multiple-choice question from the Chinese Comprehensive Ability of Clinical Medicine (TCM) Examination. For each sub-question, there are four options labeled A, B, C, and D, among which at least two meet the requirements of the question. Please choose the correct answers and generate a correct and reasonable answer analysis The indications of Thunberg Fritillary are () A. Wind-…	D	AC	Analysis: The indications of Thunberg Fritillary mother are clearing heat and eliminating phlegm, reducing qi and relieving cough, dispersing swelling, which has certain effects on wind heat or phlegm-heat cough, lung carbuncle vomiting pus, sore carbuncle swelling poison. Answer: This is D."	FALSE	YES	YES	NO	YES	YES
130	multiple-choice question	Pharmacology of TCM	The following is a multiple-choice question from the Chinese Comprehensive Ability of Clinical Medicine (TCM) Examination. For each sub-question, there are four options labeled A, B, C, and D, among which at least two meet the requirements of the question. Please choose the correct answers and generate a correct and reasonable answer analysis The efficacy of Eucommia is () A. dispelling wind-damp…	ABC	BCD	Answer: This question chooses A, B, C analysis: Euperia has the effect of tonifying liver and kidney, strengthening muscles and bones, and can be used to treat the symptoms of waist and knee weakness, muscles and bones weakness. At the same time, Eucommia also has a certain effect of dispelling wind and dampness, which can relieve joint pain and muscle soreness. Placenta is not one of the main ef…	FALSE	YES	YES	NO		YES
131	multiple-choice question	Pharmacology of TCM	The following is a multiple-choice question from the Chinese Comprehensive Ability of Clinical Medicine (TCM) Examination. For each sub-question, there are four options labeled A, B, C, and D, among which at least two meet the requirements of the question. Please choose the correct answers and generate a correct and reasonable answer analysis Of the following drugs, pregnant women should be cauti…	D	ABCD	Analysis: The drugs that pregnant women should use with caution include rhubarb, senna, hawthorn, Trifoliate, Puhuang, Taiyangflower gum, motherwort, Moutan bark, Yu Jin, aconite, cinnamon, dried ginger, white bud root, pearl barley kernel, east Taiyangflower seed and Tongcao. Answer: This is D."	FALSE	YES	YES	NO	YES	YES
132	multiple-choice question	Pharmacology of TCM	The following is a multiple-choice question from the Chinese Comprehensive Ability of Clinical Medicine (TCM) Examination. For each sub-question, there are four options labeled A, B, C, and D, among which at least two meet the requirements of the question. Please choose the correct answers and generate a correct and reasonable answer analysis The following treatment of rheumatic fever, commonly u…	A	ABC	"Analysis: The treatment of rheumatic heat bi, often used drugs are Daqingentian Decoction , in addition to wind and Qiang live Decoction , white tiger plus laurel branch Decoction , as well as angelica Tianpain Decoction , lotus leaf ligusticum Decoction , latent powder and so on. These prescriptions through the doctor's syndrome differentiation reasonable through the symptomatic treatment of tr…	FALSE	YES	YES	NO		YES
133	multiple-choice question	Pharmacology of TCM	The following is a multiple-choice question from the Chinese Comprehensive Ability of Clinical Medicine (TCM) Examination. For each sub-question, there are four options labeled A, B, C, and D, among which at least two meet the requirements of the question. Please choose the correct answers and generate a correct and reasonable answer analysis Panax notoginseng and Pu Huang are mainly used in () A…	D	ACD	Analysis: Panax Notoginseng and Pu Huang belong to stasis and hemostasis drugs, can treat stasis and bleeding. Answer: This is D."	FALSE	YES	YES	NO		YES
134	multiple-choice question	Pharmacology of TCM	The following is a multiple-choice question from the Chinese Comprehensive Ability of Clinical Medicine (TCM) Examination. For each sub-question, there are four options labeled A, B, C, and D, among which at least two meet the requirements of the question. Please choose the correct answers and generate a correct and reasonable answer analysis Oyster Treatment () A. spermatosynopsis B. palpitation…	A	ABCD	"The treatment of oysters is spermatosynopsis. Answer: This is choice A.	FALSE	NO	NO	NO		YES
135	multiple-choice question	Pharmacology of TCM	The following is a multiple-choice question from the Chinese Comprehensive Ability of Clinical Medicine (TCM) Examination. For each sub-question, there are four options labeled A, B, C, and D, among which at least two meet the requirements of the question. Please choose the correct answers and generate a correct and reasonable answer analysis Indications of calamine () A. wet sores itching B. unr…	C	ABC	"Calamine is a disease of the eyes. The answer is C.	FALSE	NO	NO	NO		YES
136	multiple-choice question	Formulas of TCM	The following is a multiple-choice question from the Chinese Comprehensive Ability of Clinical Medicine (TCM) Examination. For each sub-question, there are four options labeled A, B, C, and D, among which at least two meet the requirements of the question. Please choose the correct answers and generate a correct and reasonable answer analysis Belonging to the "Israeli legal Authority" are () A. T…	A	ABCD	"Answer: This is choice A Analysis: "To rule the formula" means according to the theory of traditional Chinese medicine, according to certain rules and methods to organize the formula. Among them, "law dispatching prescription" refers to the method of dispatching prescription to achieve the purpose of treatment according to the theory of traditional Chinese medicine; According to the theory of tr…	FALSE	YES	YES	NO		YES
137	multiple-choice question	Formulas of TCM	The following is a multiple-choice question from the Chinese Comprehensive Ability of Clinical Medicine (TCM) Examination. For each sub-question, there are four options labeled A, B, C, and D, among which at least two meet the requirements of the question. Please choose the correct answers and generate a correct and reasonable answer analysis The formulae classified according to their function or…	B	BD	"Answer: This is choice B Analysis: The prescription classification according to the function or treatment of the prescription is eight. Eight regimens are commonly used in TCM clinical prescription classification, which are divided into eight categories: relieving surface, purging, reconciling, clearing heat, warming inside, tonifying, reinforcing astringent and calming the mind, so as to facili…	FALSE	YES	YES	YES		YES
138	multiple-choice question	Formulas of TCM	The following is a multiple-choice question from the Chinese Comprehensive Ability of Clinical Medicine (TCM) Examination. For each sub-question, there are four options labeled A, B, C, and D, among which at least two meet the requirements of the question. Please choose the correct answers and generate a correct and reasonable answer analysis The Intention of Combining Cohosh with Stomach Clearin…	A	ABD	"The purpose of combining cohosh with stomach clearing powder is to diffuse fire. Answer: This is choice A Analysis: Qingwei Powder is a prescription for clearing heat and expelling fire. It is mainly used to treat dry mouth, thirst, sore throat and other symptoms caused by stomach heat. The combination of cohosh can enhance the effect of Qingwei powder on clearing heat and expelling fire, and ha…	FALSE	YES	YES	YES		YES
139	multiple-choice question	Formulas of TCM	The following is a multiple-choice question from the Chinese Comprehensive Ability of Clinical Medicine (TCM) Examination. For each sub-question, there are four options labeled A, B, C, and D, among which at least two meet the requirements of the question. Please choose the correct answers and generate a correct and reasonable answer analysis The following are Chuanxiong Chadiao based on () A. Th…	A	ABD	"Answer: This is choice A Analysis: Chuanxiong Chatiao San is a kind of prescription used to treat headache, and its prescription is based on "Waifeng Yishan", that is, it is suitable for headache caused by external wind cold. On the top of the top, the only wind medicine can be a view in the theory of traditional Chinese medicine, that the wind evil is the most easy to invade the human head, so …	FALSE	YES	YES	YES	YES	YES
140	multiple-choice question	Formulas of TCM	The following is a multiple-choice question from the Chinese Comprehensive Ability of Clinical Medicine (TCM) Examination. For each sub-question, there are four options labeled A, B, C, and D, among which at least two meet the requirements of the question. Please choose the correct answers and generate a correct and reasonable answer analysis The combination of pinellia sinensis and Ophiopogon, w…	B	AD	"Answer: This is choice B Analysis: The combination of pinellia and ophiopogon is Xuanfu Daizhe decoction. Xuanfu Daizhe Decoction is a kind of prescription used to treat stomach diseases, in which the combination of pinellia and ophiopogon can remove the toxicity of pinellia and retain its efficacy, so as to achieve the purpose of "detoxification and preservation". Among other options, wheat Men…	FALSE	YES	YES	YES		YES
141	multiple-choice question	Formulas of TCM	The following is a multiple-choice question from the Chinese Comprehensive Ability of Clinical Medicine (TCM) Examination. For each sub-question, there are four options labeled A, B, C, and D, among which at least two meet the requirements of the question. Please choose the correct answers and generate a correct and reasonable answer analysis Gastrodia Guteng drink and Dendrobium night light Wan …	C	AC	"The answer is C Analysis: Tianma Guteng drink and Dendrobium night light Wan are commonly used prescriptions of traditional Chinese medicine, with the effect of calming liver and wind. Gastrodia Guteng drink is mainly used to treat headache, vertigo and other symptoms, its main components Gastrodia and Guteng have the effect of calming liver wind; Dendrobium night light Wan is mainly used to tre…	FALSE	YES	YES	YES		YES
142	multiple-choice question	Formulas of TCM	The following is a multiple-choice question from the Chinese Comprehensive Ability of Clinical Medicine (TCM) Examination. For each sub-question, there are four options labeled A, B, C, and D, among which at least two meet the requirements of the question. Please choose the correct answers and generate a correct and reasonable answer analysis The following formulae for the treatment of spontaneou…	C	ABC	"The answer is C Analysis: Oyster powder is a kind of prescription used to treat spontaneous sweating. Oyster has the effect of astringent and antiperspirant, which is often used to treat the symptoms of spontaneous sweating and night sweating caused by kidney Yin deficiency. Among other options, Guizhi decoction is mainly used to treat symptoms such as wind cold, cold and headache; Yupingfeng po…	FALSE	YES	YES	YES	YES	YES
143	multiple-choice question	Formulas of TCM	The following is a multiple-choice question from the Chinese Comprehensive Ability of Clinical Medicine (TCM) Examination. For each sub-question, there are four options labeled A, B, C, and D, among which at least two meet the requirements of the question. Please choose the correct answers and generate a correct and reasonable answer analysis The following formulae for supplementing lung qi, nour…	C	AB	"The answer is C Analysis: Baihe Gujin Decoction is a kind of prescription used to treat long cough. It has the effect of tonifying lung qi and nourishing lung Yin. Among them, lily has the function of clearing lung and moistening dryness, which can relieve cough symptoms; Astragalus, white art and other drugs in Gujin Decoction can tonify temper, enhance the body's resistance, and help to improv…	FALSE	YES	YES	YES		YES
144	multiple-choice question	Formulas of TCM	The following is a multiple-choice question from the Chinese Comprehensive Ability of Clinical Medicine (TCM) Examination. For each sub-question, there are four options labeled A, B, C, and D, among which at least two meet the requirements of the question. Please choose the correct answers and generate a correct and reasonable answer analysis The following derivatives of Guizhi Decoction are () A…	D	ABC	"The answer is D Analysis: Guizhi Poria Wan is a prescription derived from Guizhi decoction, which is mainly used to treat spleen and stomach weakness, edema and other symptoms. Guizhi and poria Wan are made by adding poria and other drugs on the basis of Guizhi decoction. It has the functions of warming the middle and strengthening the spleen and reducing swelling. Among other options, Angelica …	FALSE	YES	YES	YES		YES
145	multiple-choice question	Formulas of TCM	The following is a multiple-choice question from the Chinese Comprehensive Ability of Clinical Medicine (TCM) Examination. For each sub-question, there are four options labeled A, B, C, and D, among which at least two meet the requirements of the question. Please choose the correct answers and generate a correct and reasonable answer analysis The following statements about Buyang Huanwu decoction…	A	ABCD	Analysis: Buyang Huanwu Decoction is a traditional Chinese medicine prescription, with the effect of tonifying qi, promoting blood circulation and clearing collaterals, treating the syndrome of Qi deficiency and blood stasis of stroke. Clinical commonly used to treat cerebrovascular accident sequelae, coronary heart disease, poliomyelitis sequelae and so on. Answer: This is choice A.	FALSE	YES	YES	NO		YES
146	multiple-choice question	Internal Medicine of TCM	The following is a multiple-choice question from the Chinese Comprehensive Ability of Clinical Medicine (TCM) Examination. For each sub-question, there are four options labeled A, B, C, and D, among which at least two meet the requirements of the question. Please choose the correct answers and generate a correct and reasonable answer analysis Treatments that can be used for jue confirmation inclu…	AD	ABCD	"A. D. Analysis: Jue syndrome refers to a group of symptoms caused by a variety of reasons that cause the movement of Qi and blood is not smooth, so that the body loses its regulatory function. There are two main methods of TCM treatment for jue syndrome: opening the body to awaken the spirit and promoting blood circulation to remove blood stasis. Among them, resuscitation is to restore the regul…	FALSE	YES	YES	YES		YES
147	multiple-choice question	Internal Medicine of TCM	The following is a multiple-choice question from the Chinese Comprehensive Ability of Clinical Medicine (TCM) Examination. For each sub-question, there are four options labeled A, B, C, and D, among which at least two meet the requirements of the question. Please choose the correct answers and generate a correct and reasonable answer analysis The following blood syndrome can be treated by Guipi d…	D	ABD	Analysis: Guipi Decoction is a traditional Chinese medicine prescription, with beneficial qi tonifying blood, spleen and heart effect. Indications: Heart and spleen Qi and blood deficiency syndrome, palpitation, insomnia, night sweats, body fatigue, little food, pale, pale tongue, thin white fur, thin pulse; Spleen failure to regulate blood syndrome. Hematochezia, subcutaneous purpura, women's le…	FALSE	YES	YES	YES	YES	YES
[truncated: 18 more rows]

## Sheet: GPT-4
Number	Type	Subject	Question	The chosen answer from response	Correct answer	LLM's response	Evaluation metrics				Reasons for incorrect response
							Accuracy(TRUE/FALSE)	Logical reasoning(YES/NO)	Ability to use internal information(YES/NO)	Ability to use external information(YES/NO)	Logical error	Information error
[truncated: 165 more rows]
